# Supplementary material for: Novel Methylselenoesters as Antiproliferative Agents
Source: PubMed Central journal article supplement (PMC6152192; doi:10.3390/molecules22081288), 2017-08-02

## Supplementary material

### **Novel methylselenoesters as antiproliferative agents**

Nuria Díaz-Argelich<sup>1,2,3</sup>, Ignacio Encío<sup>4</sup>, Daniel Plano<sup>1,2</sup>, Aristi P. Fernandes<sup>3</sup>, Juan Antonio Palop<sup>1,2</sup>, Carmen Sanmartín<sup>1,2\*</sup>

*1) University of Navarra. Faculty of Pharmacy and Nutrition. Department of Organic and Pharmaceutical Chemistry, Irunlarrea 1, 3E-1008 Pamplona, Spain*

*2) Oncology and Hematology Section, IdiSNA, Navarra Institute for Health Research, Irunlarrea 3, E-31008, Pamplona, Spain*

*3) Division of Biochemistry, Department of Medical Biochemistry and Biophysics (MBB), Karolinska Institutet, SE-171 77 Stockholm, Sweden*

*4) Department of Health Sciences, Public University of Navarra, Avda. Barañain s/n, E-31008 Pamplona, Spain*

**Contents:**

**Representative spectra (<sup>1</sup>H and <sup>13</sup>C NMR) of the methylselenoesters**

<sup>1</sup>H NMR Compound 1

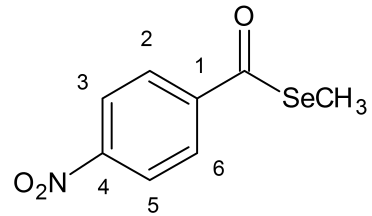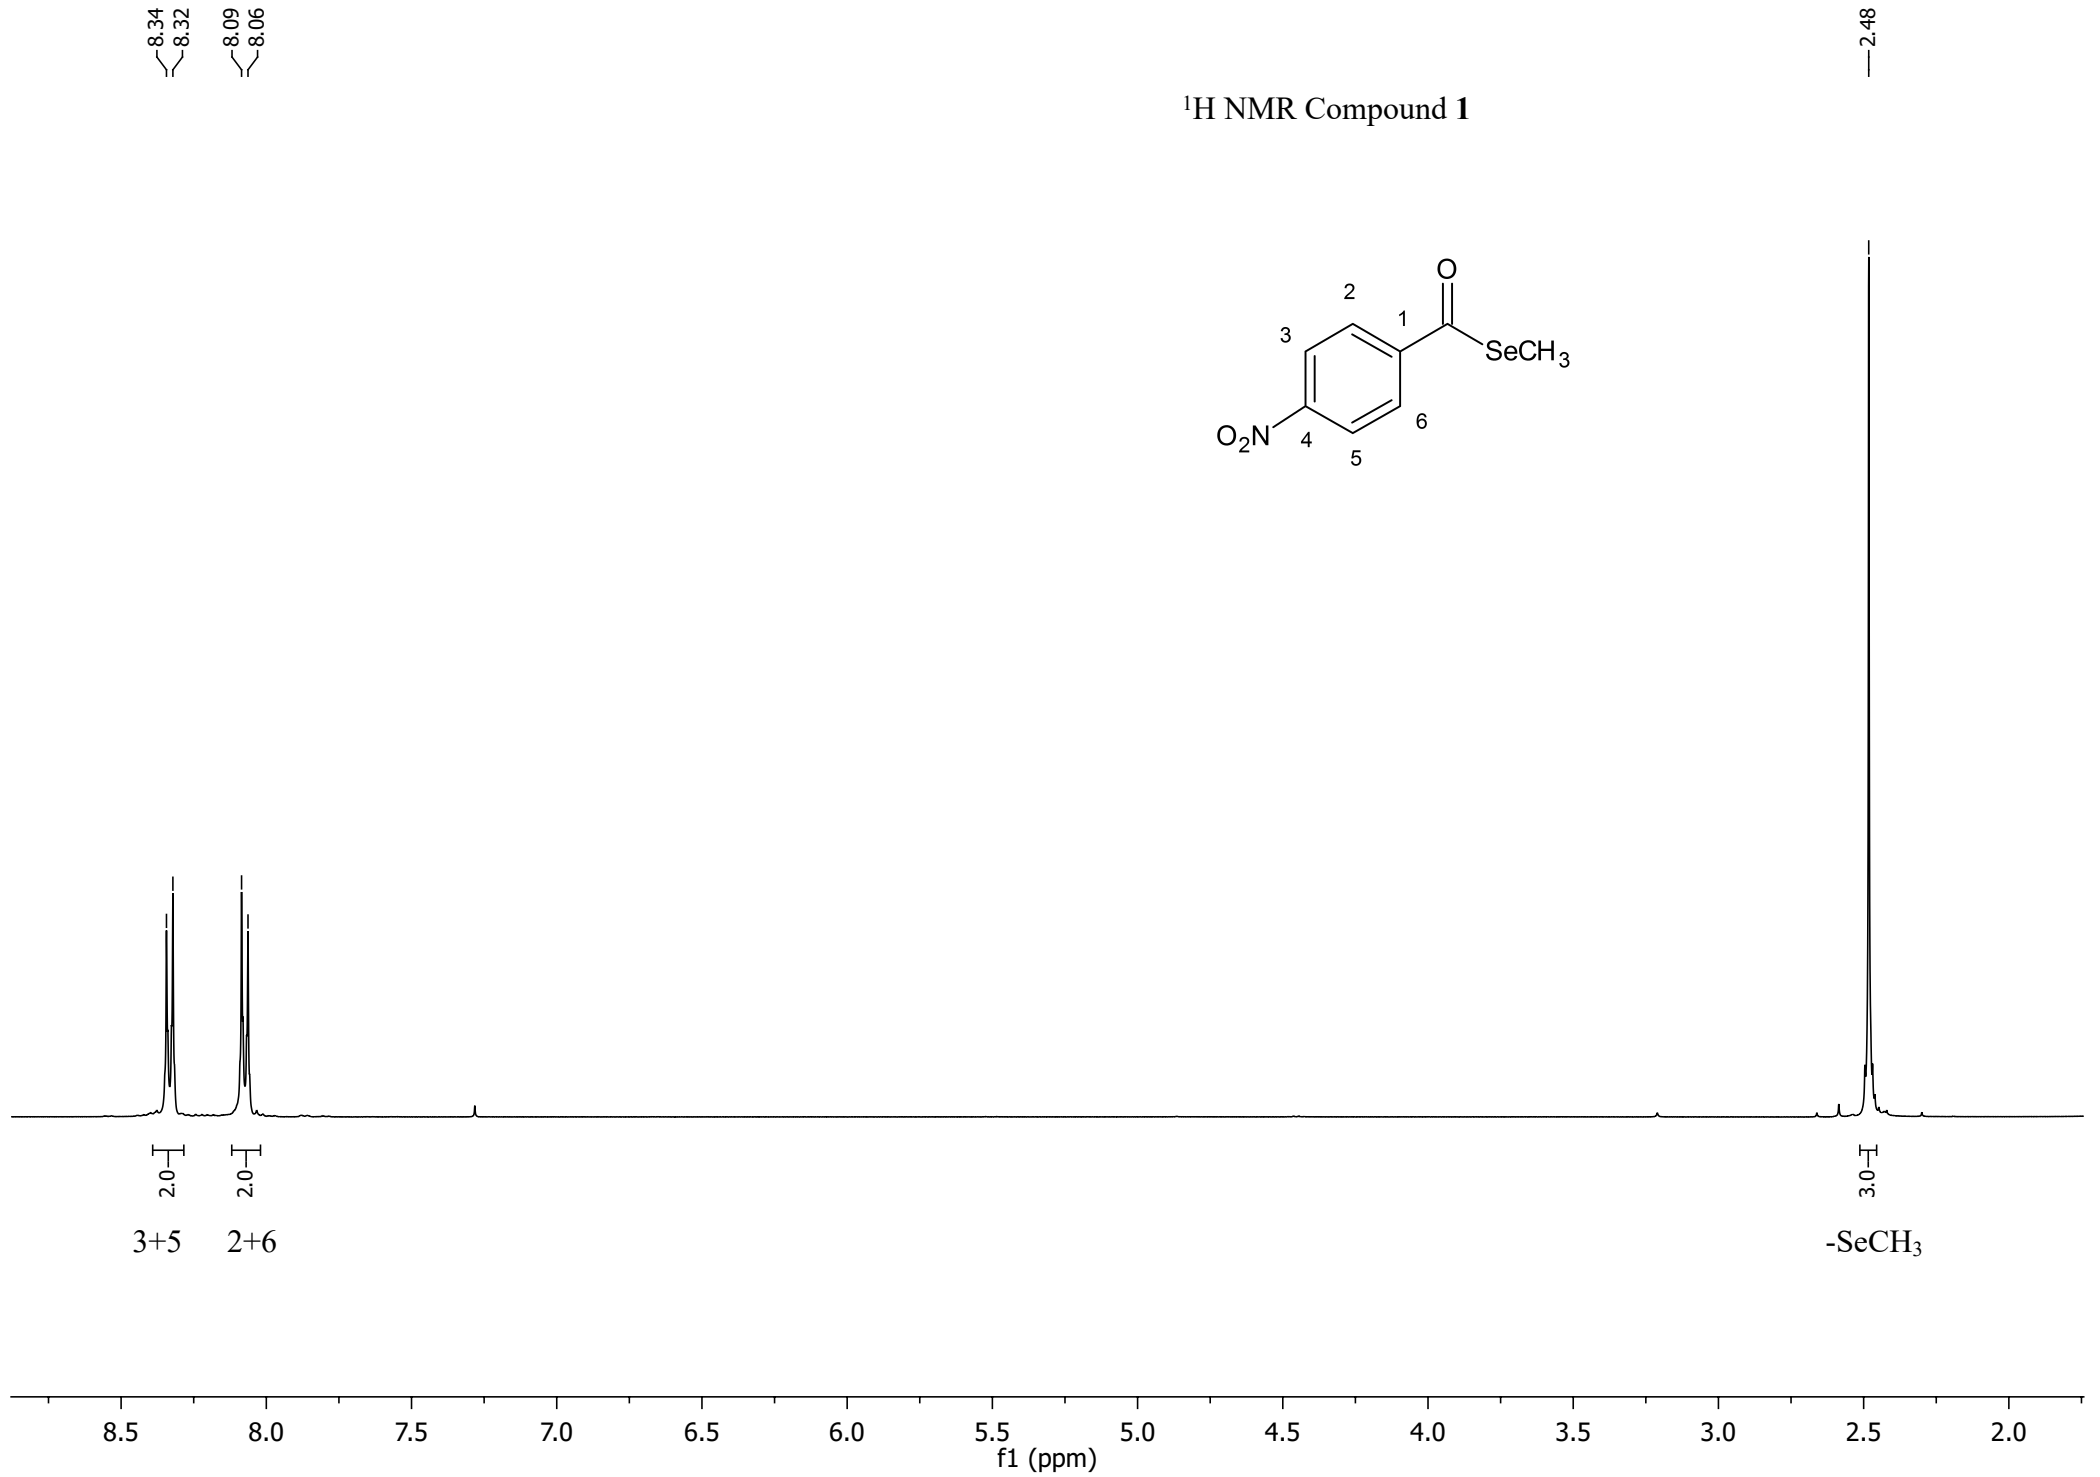

—193.72

—150.45

—143.33

—127.88

—124.07

<sup>13</sup>C NMR Compound 1

—5.97

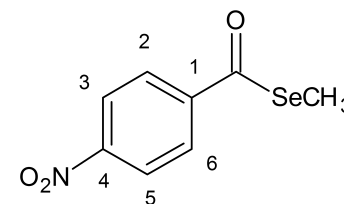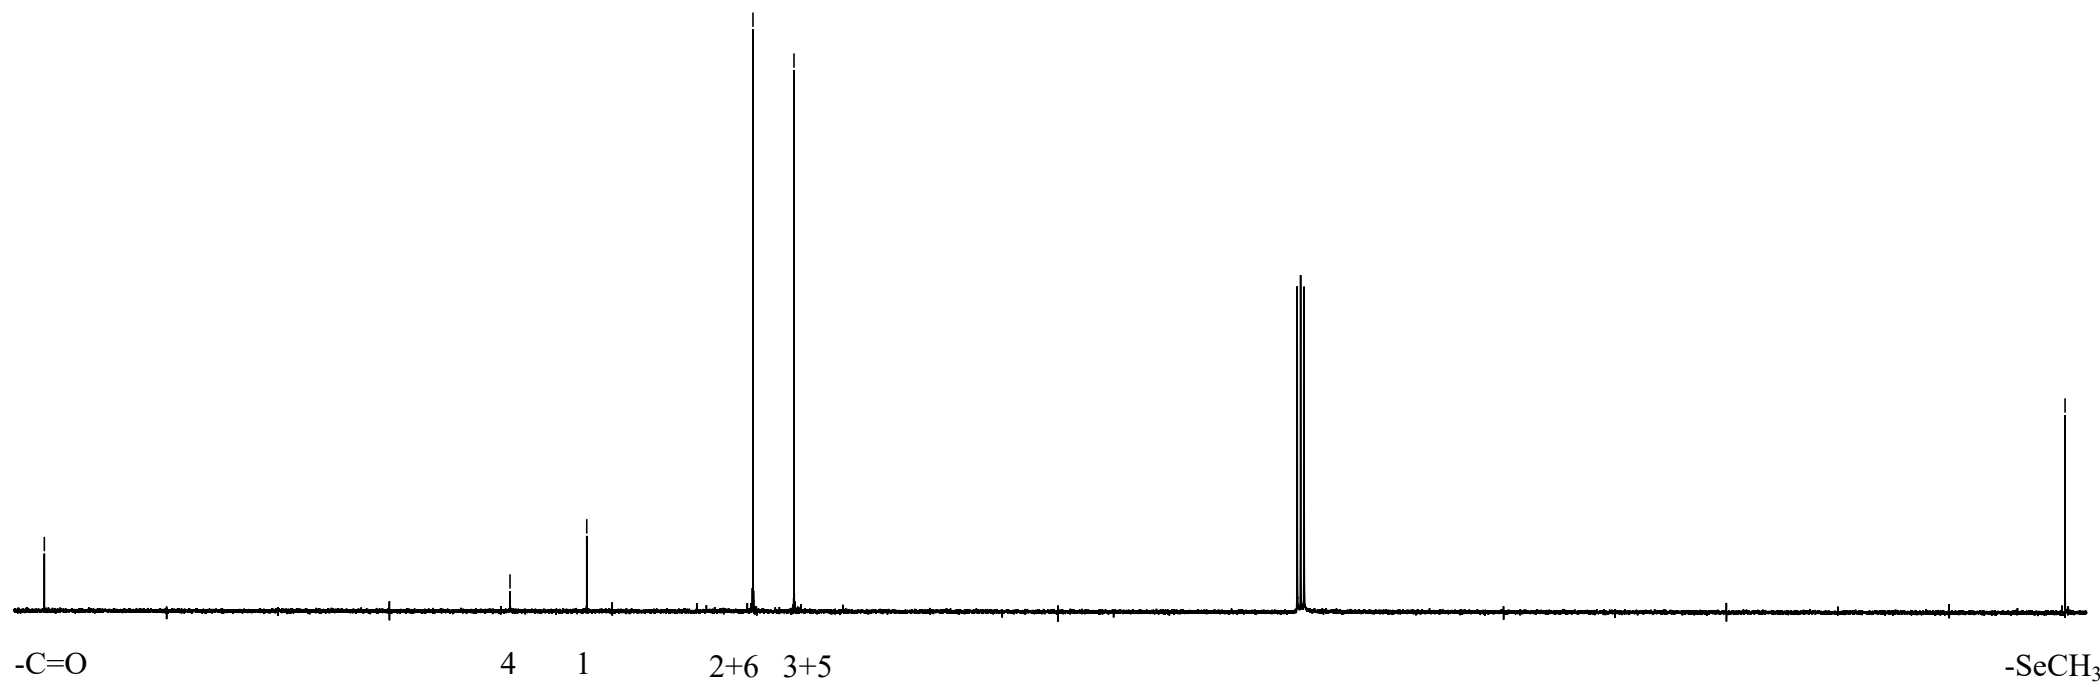

190 180 170 160 150 140 130 120 110 100 90 80 70 60 50 40 30 20 10

f1 (ppm)

<sup>1</sup>H NMR Compound 2

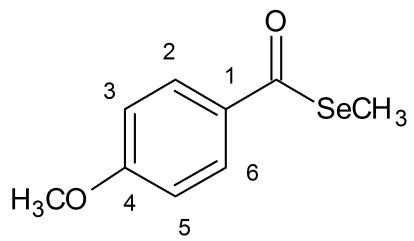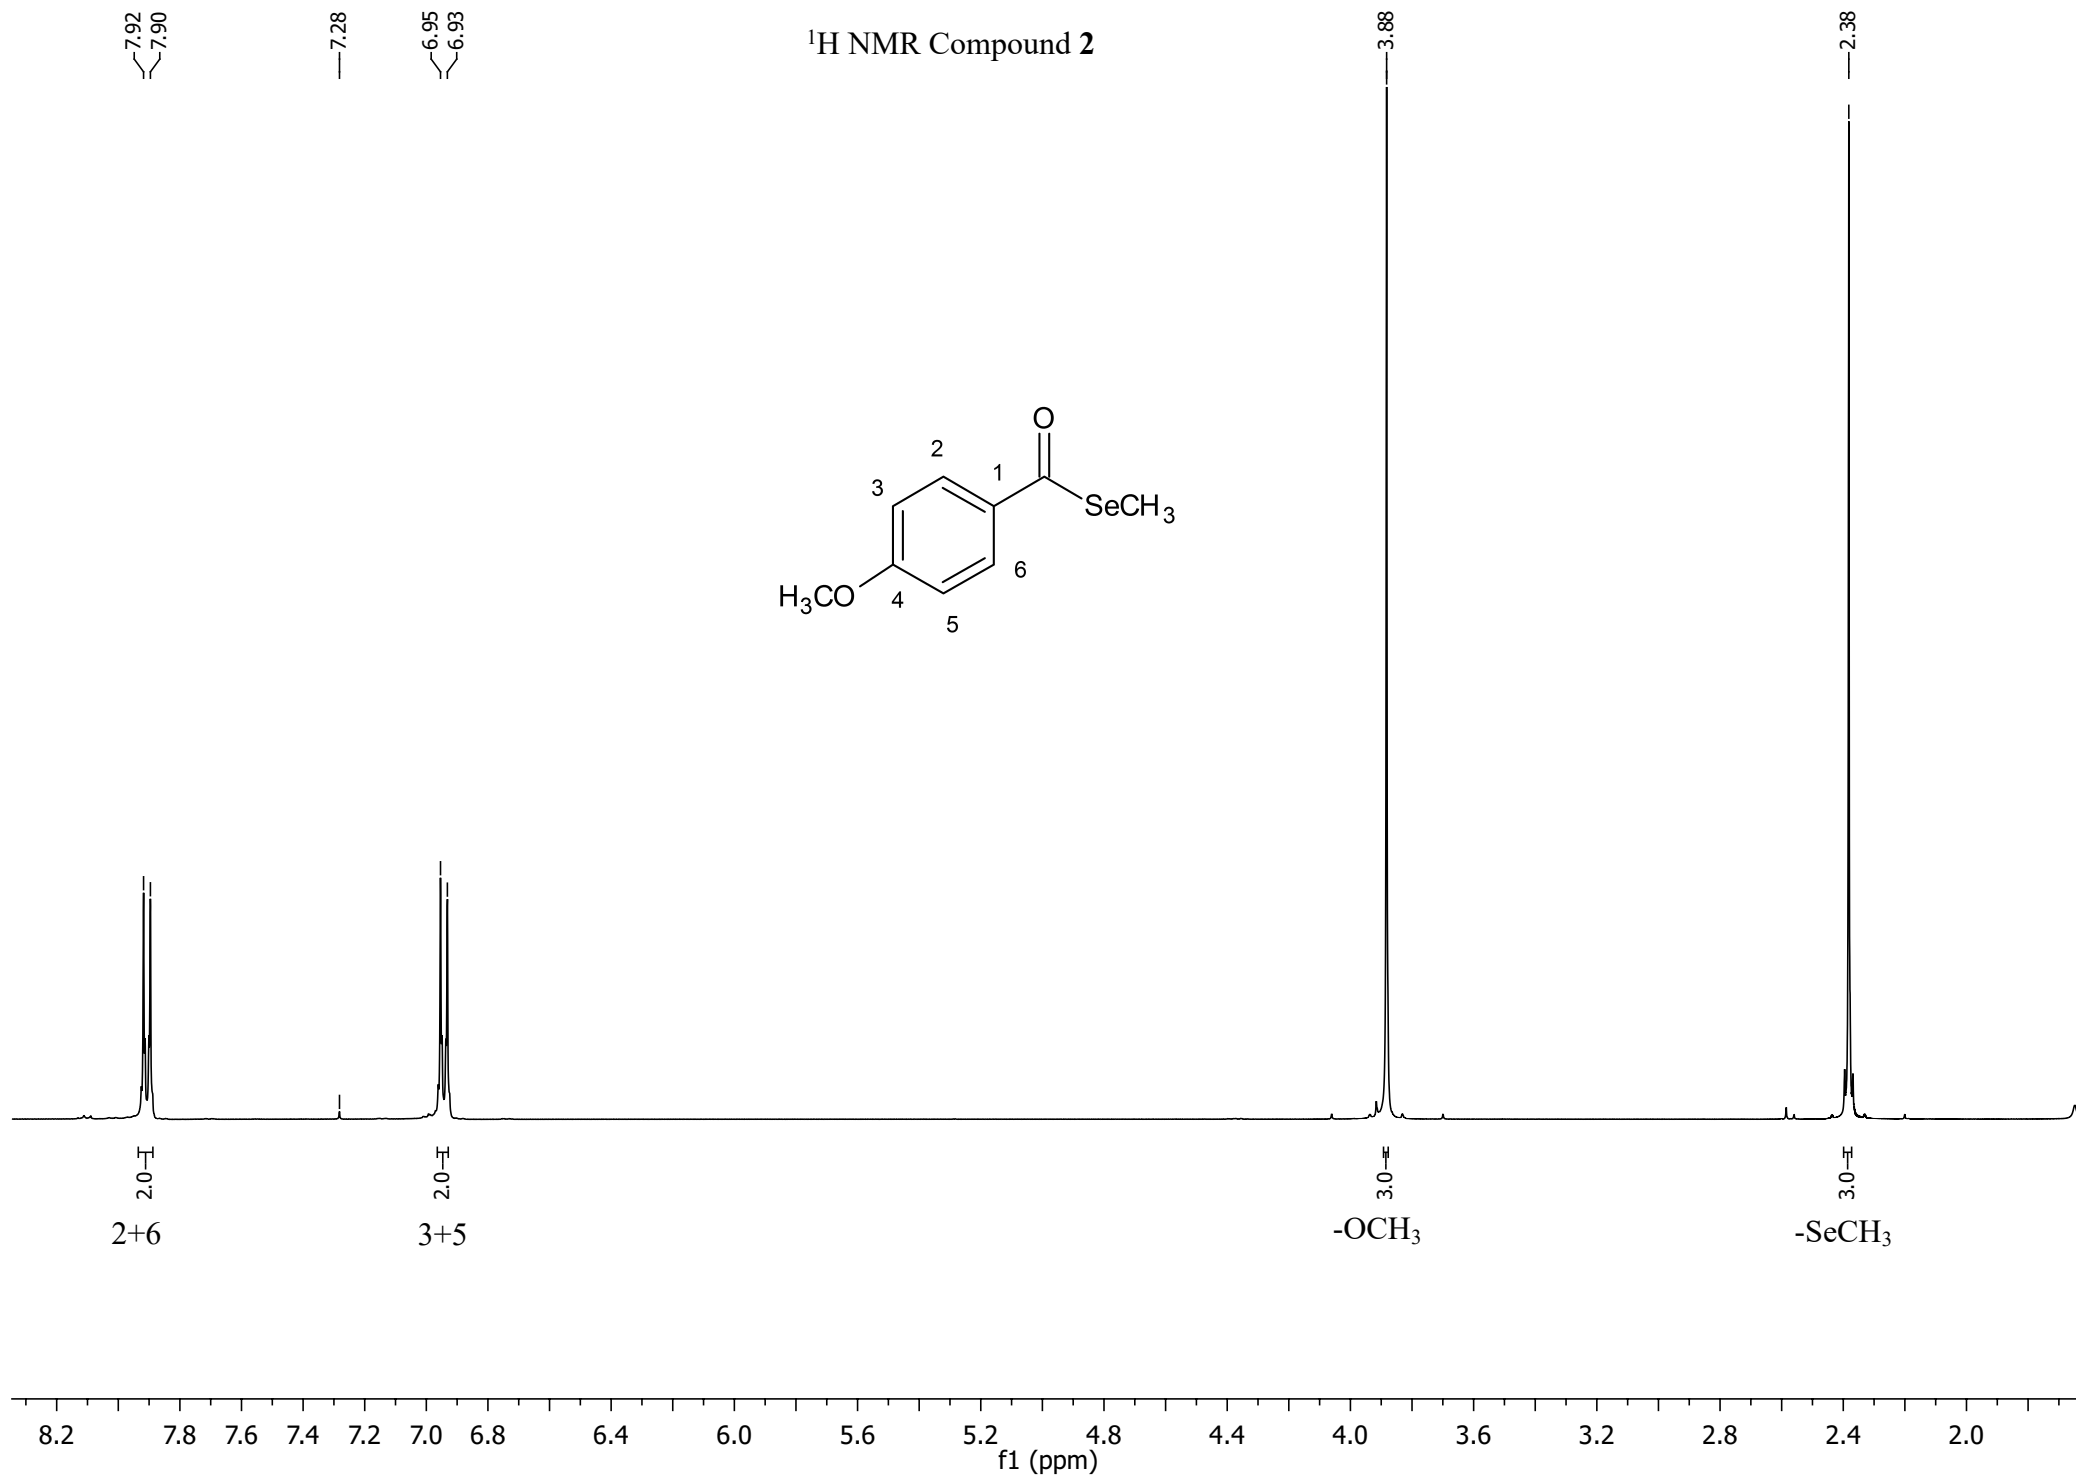

<sup>13</sup>C NMR Compound 2

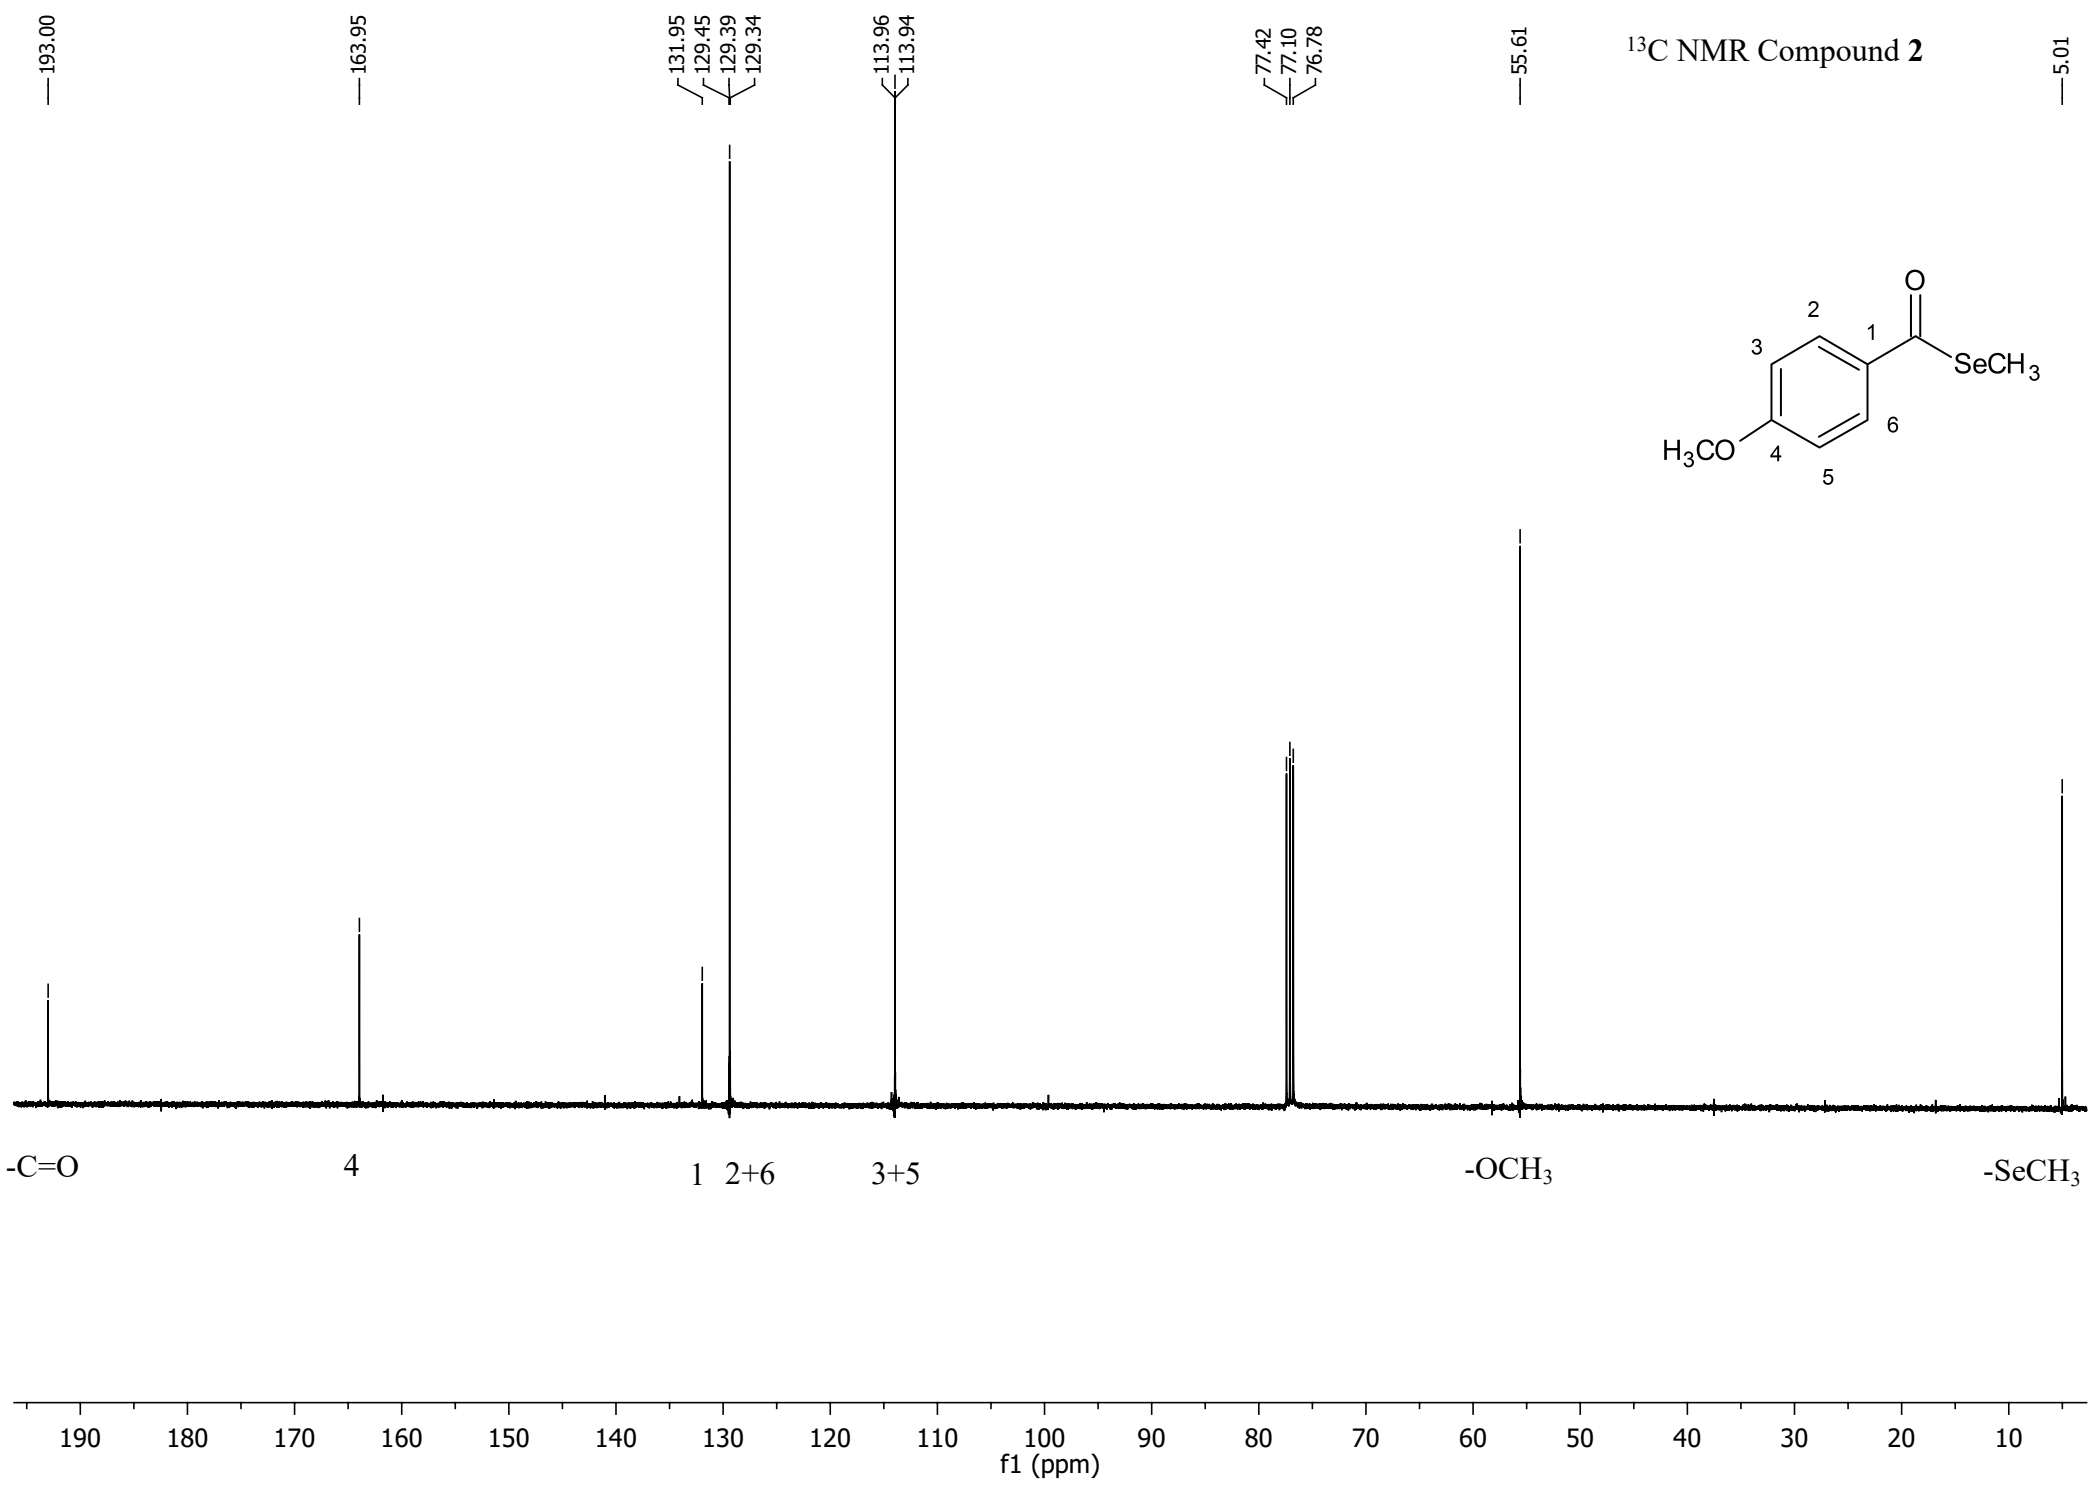

9.03  
9.03  
9.01  
9.01  
8.84  
8.84  
8.83

# <sup>1</sup>H NMR Compound 3

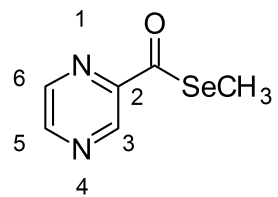

2.28

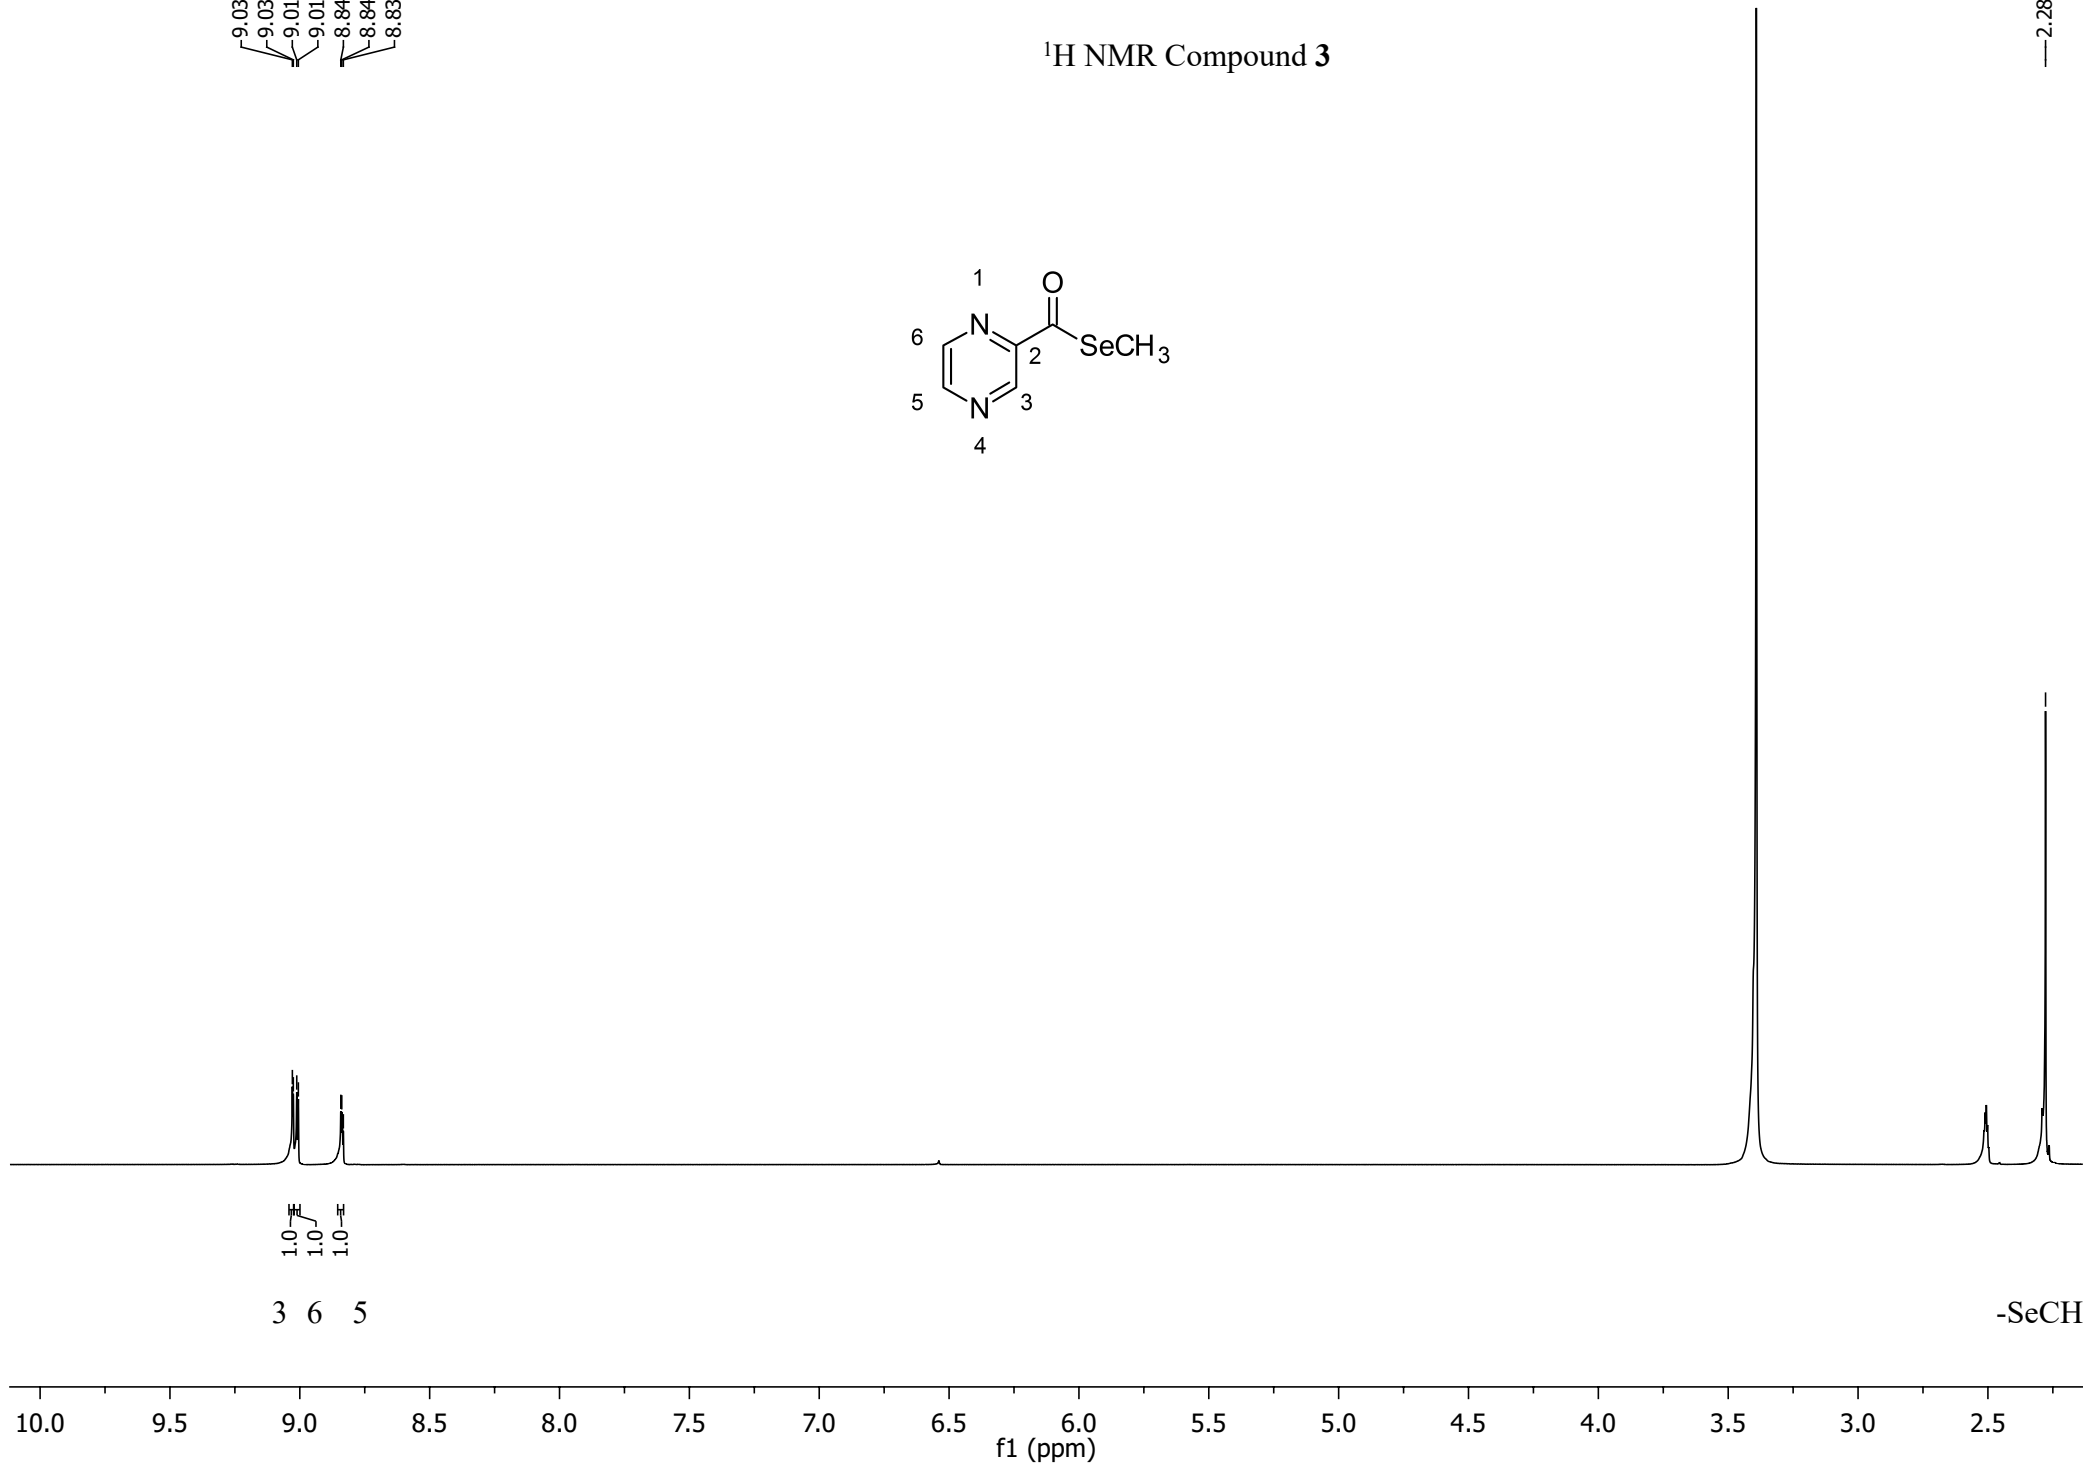

1.0  
1.0  
1.0

3 6 5

-SeCH<sub>3</sub>

10.0 9.5 9.0 8.5 8.0 7.5 7.0 6.5 6.0 5.5 5.0 4.5 4.0 3.5 3.0 2.5

f1 (ppm)

—198.03

—150.94

—147.15

—145.75

—140.40

### $^{13}\text{C}$ NMR Compound 3

—40.56

—40.35

—40.15

—4.88

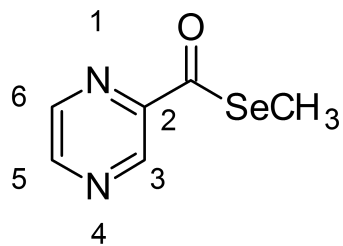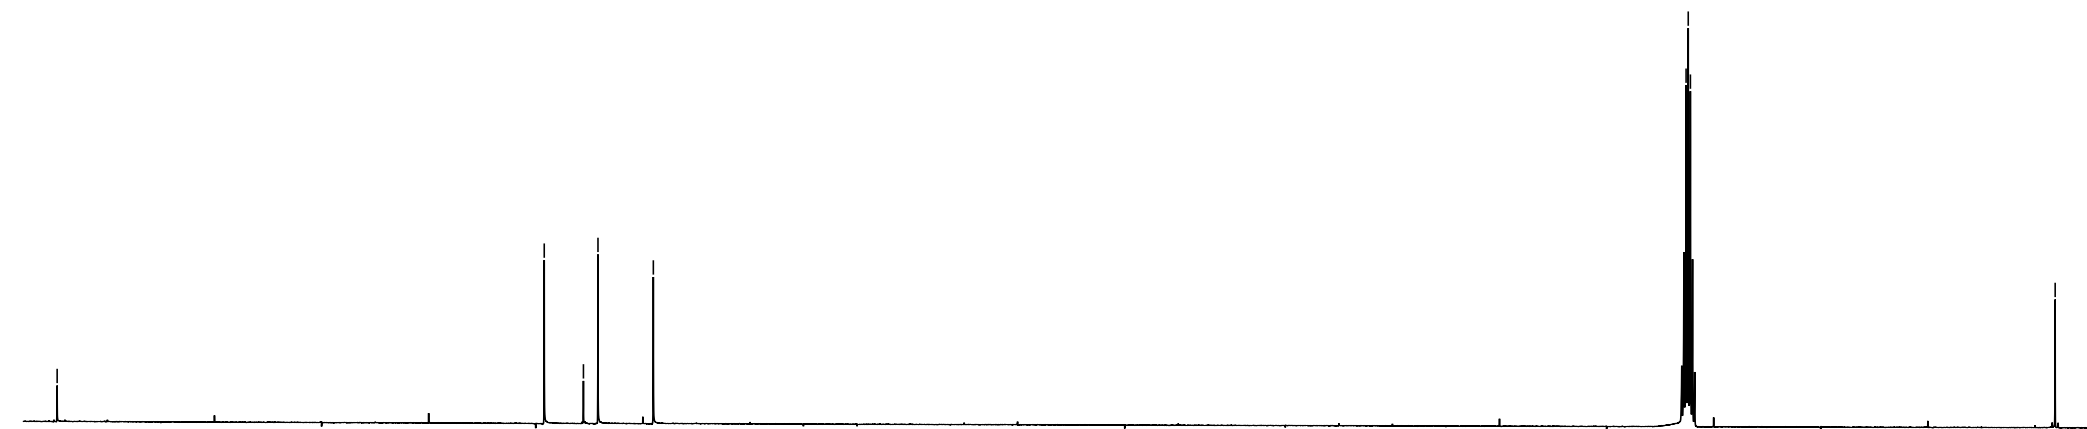

-C=O

3 5 6 2

-SeCH<sub>3</sub>

200 190 180 170 160 150 140 130 120 110 100 90 80 70 60 50 40 30 20 10

f1 (ppm)

$^1\text{H}$  NMR Compound 4

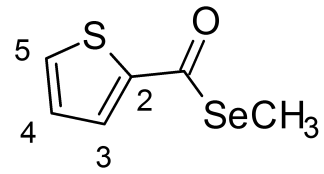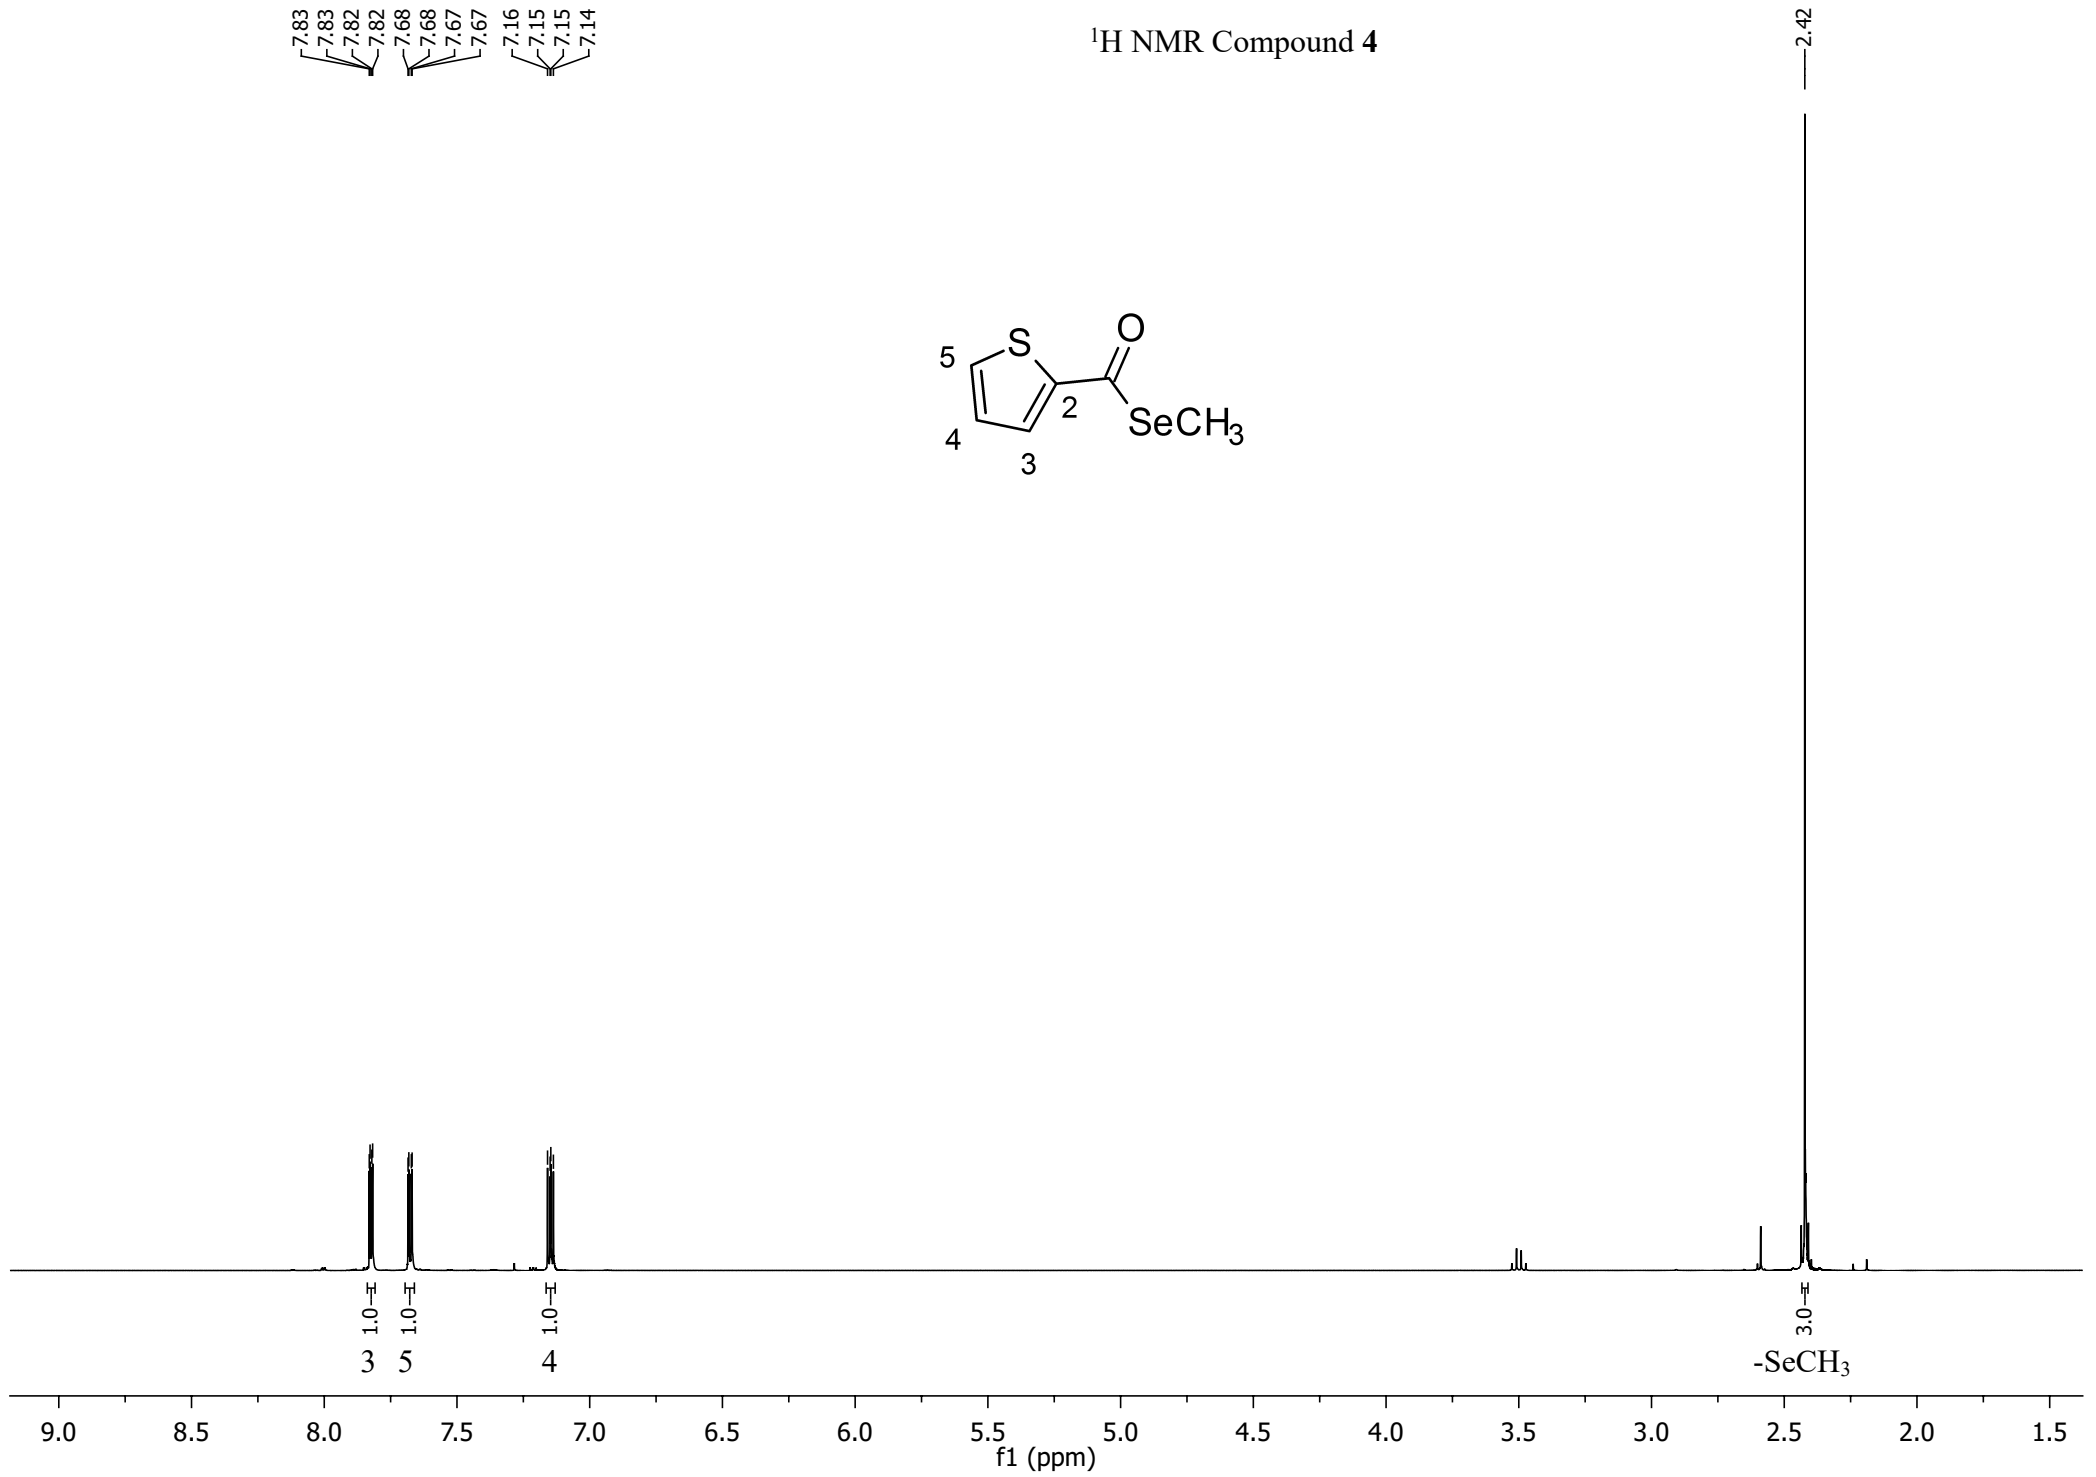



—185.48

—144.32

—133.33

—131.82

—128.29

77.78

77.46

77.14

<sup>13</sup>C NMR Compound 4

—5.70

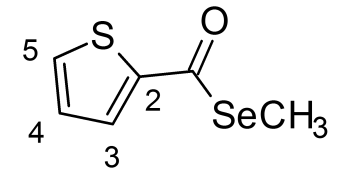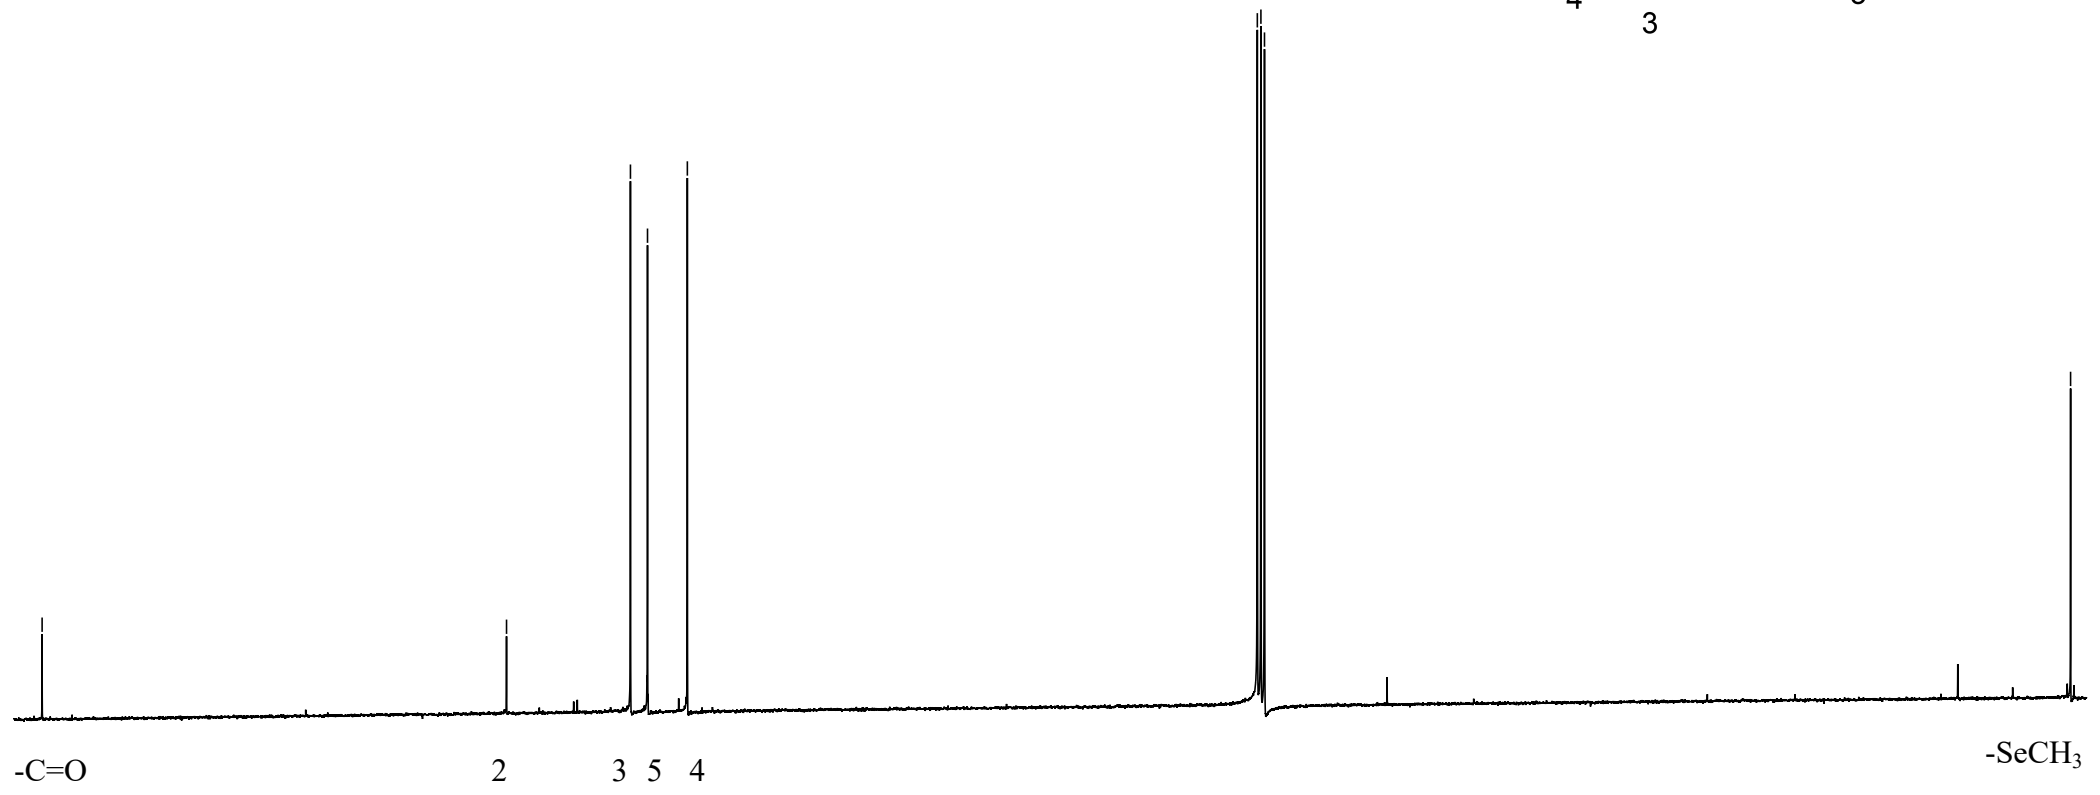

180 170 160 150 140 130 120 110 100 90 80 70 60 50 40 30 20 10  
f1 (ppm)

<sup>1</sup>H NMR Compound 5

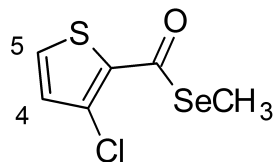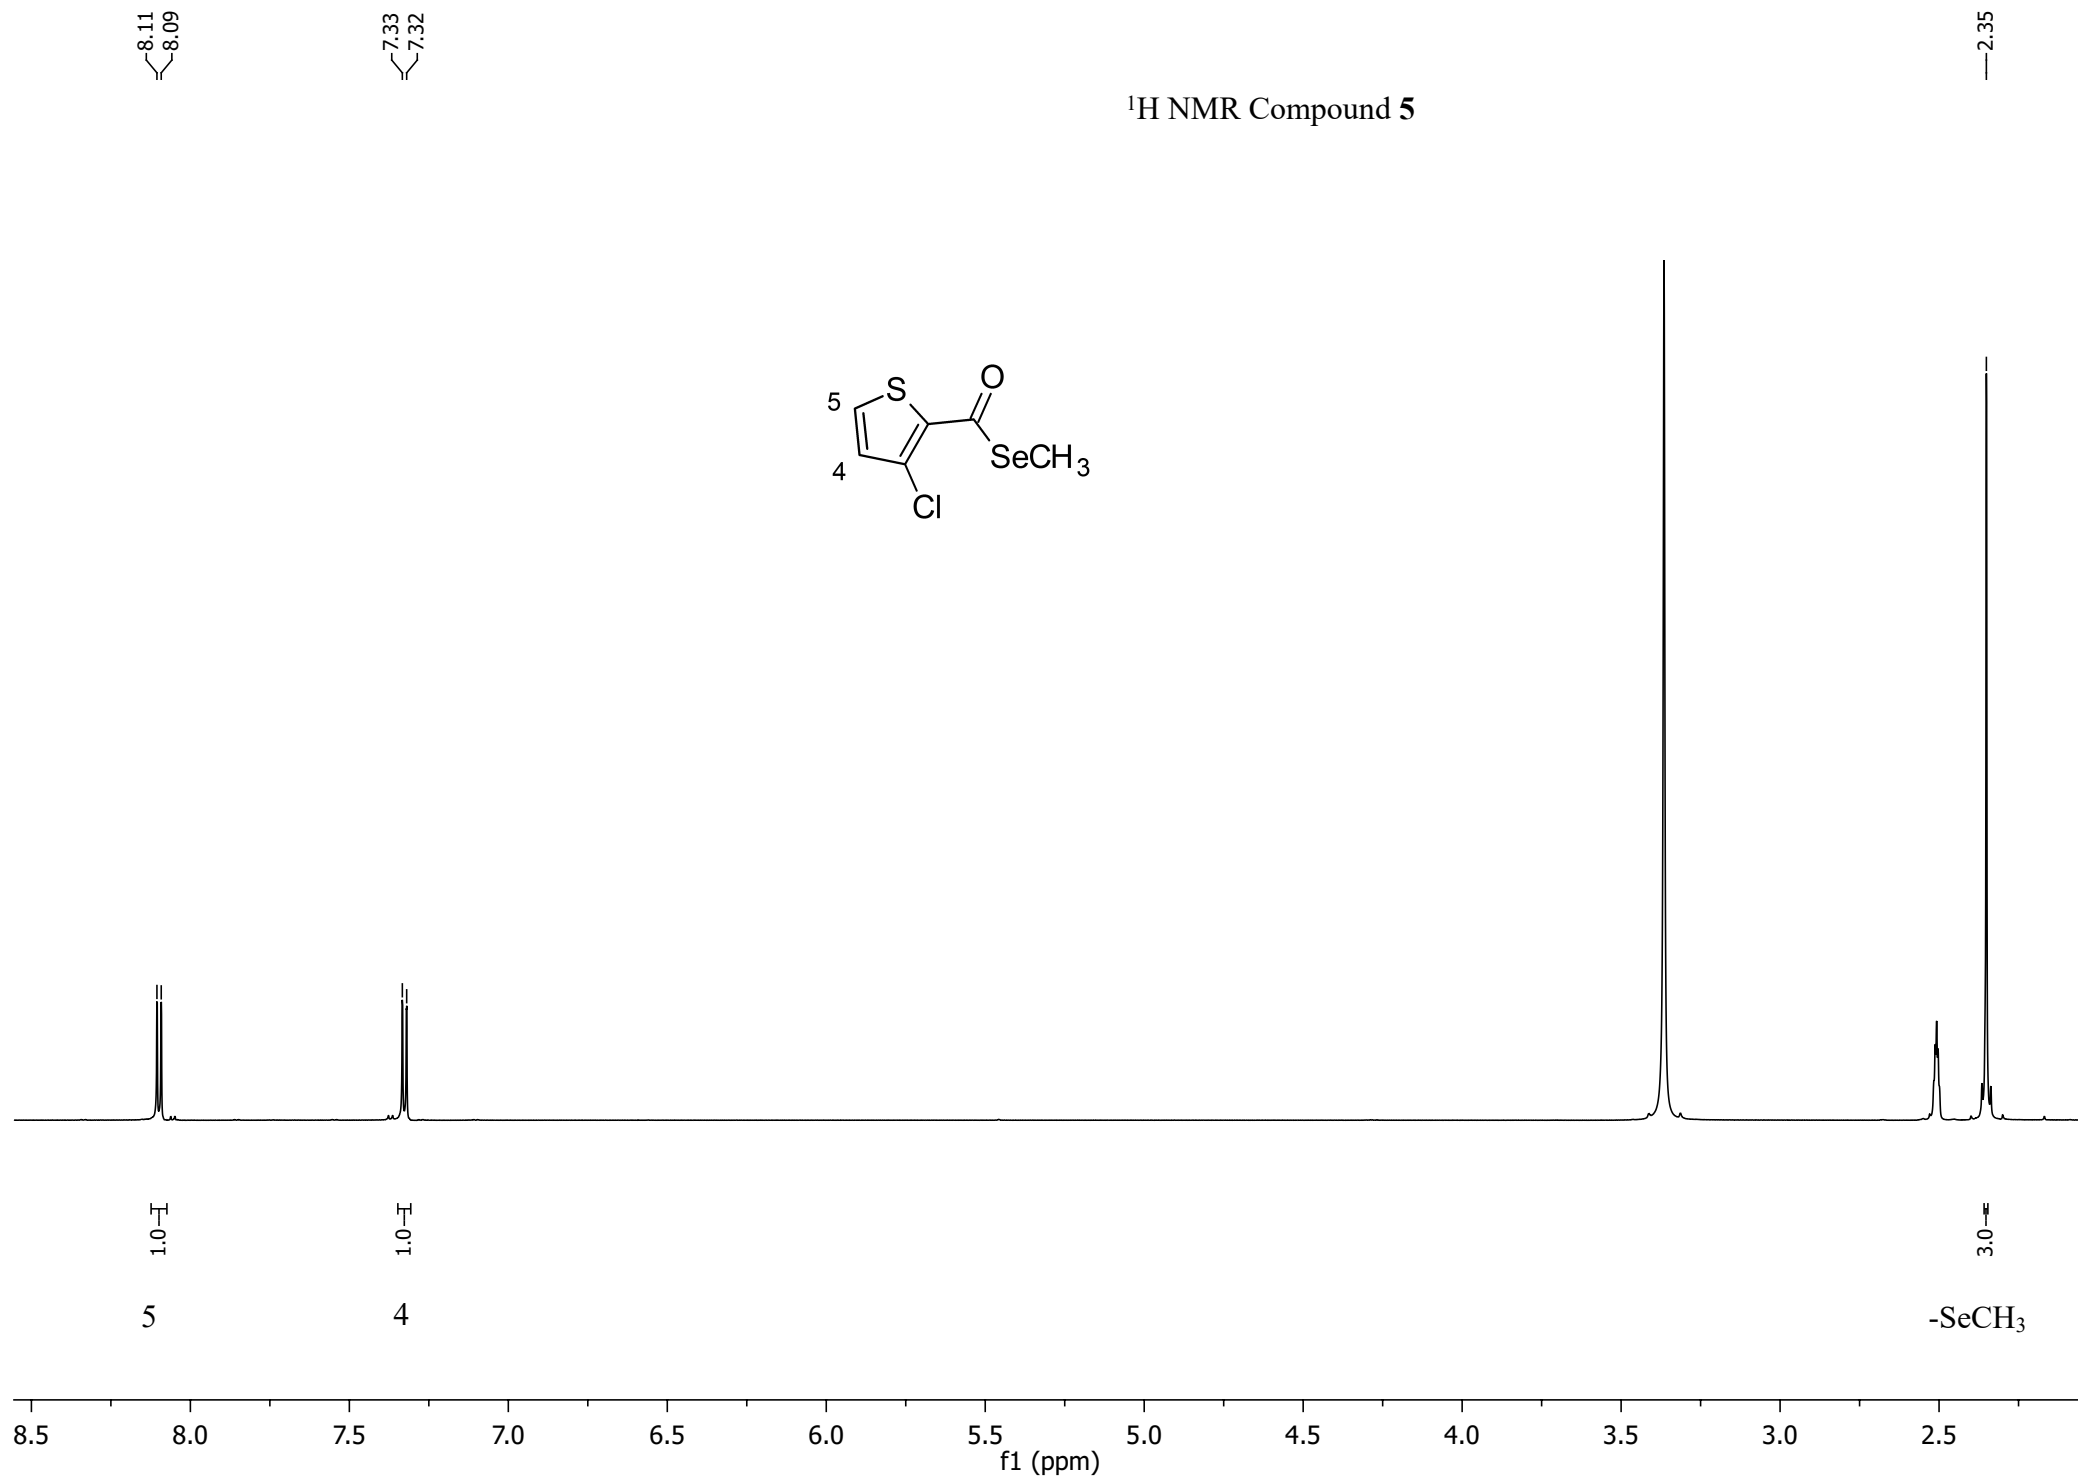

—184.34

137.24  
134.66  
131.62  
127.86

<sup>13</sup>C NMR Compound 5

40.81  
40.60  
40.39  
40.18  
39.97

—6.85

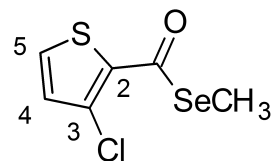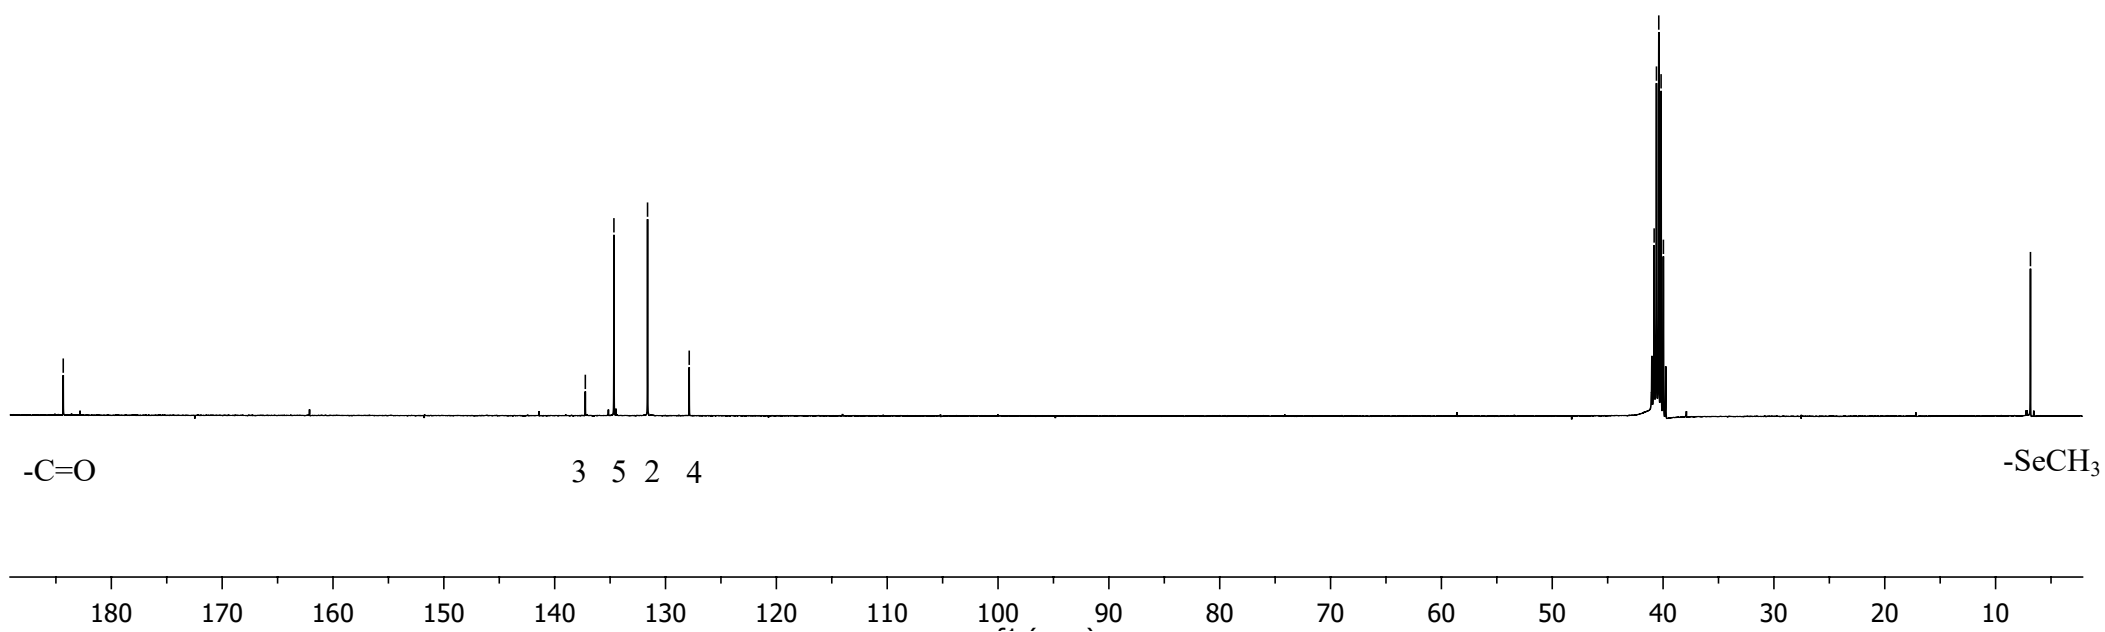

8.92  
8.91

<sup>1</sup>H NMR Compound 6

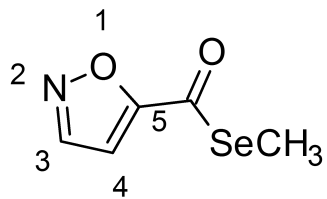

2.42

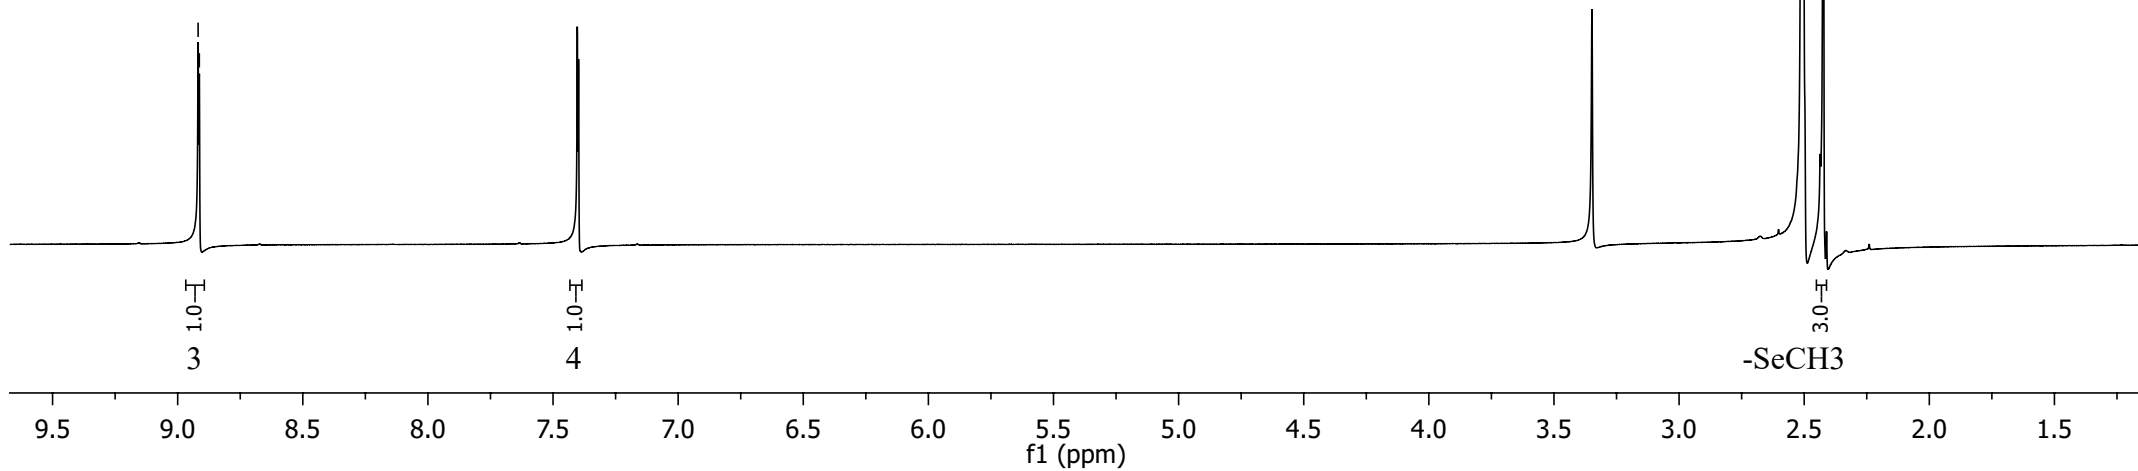

<sup>13</sup>C NMR Compound 6

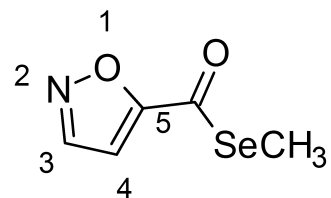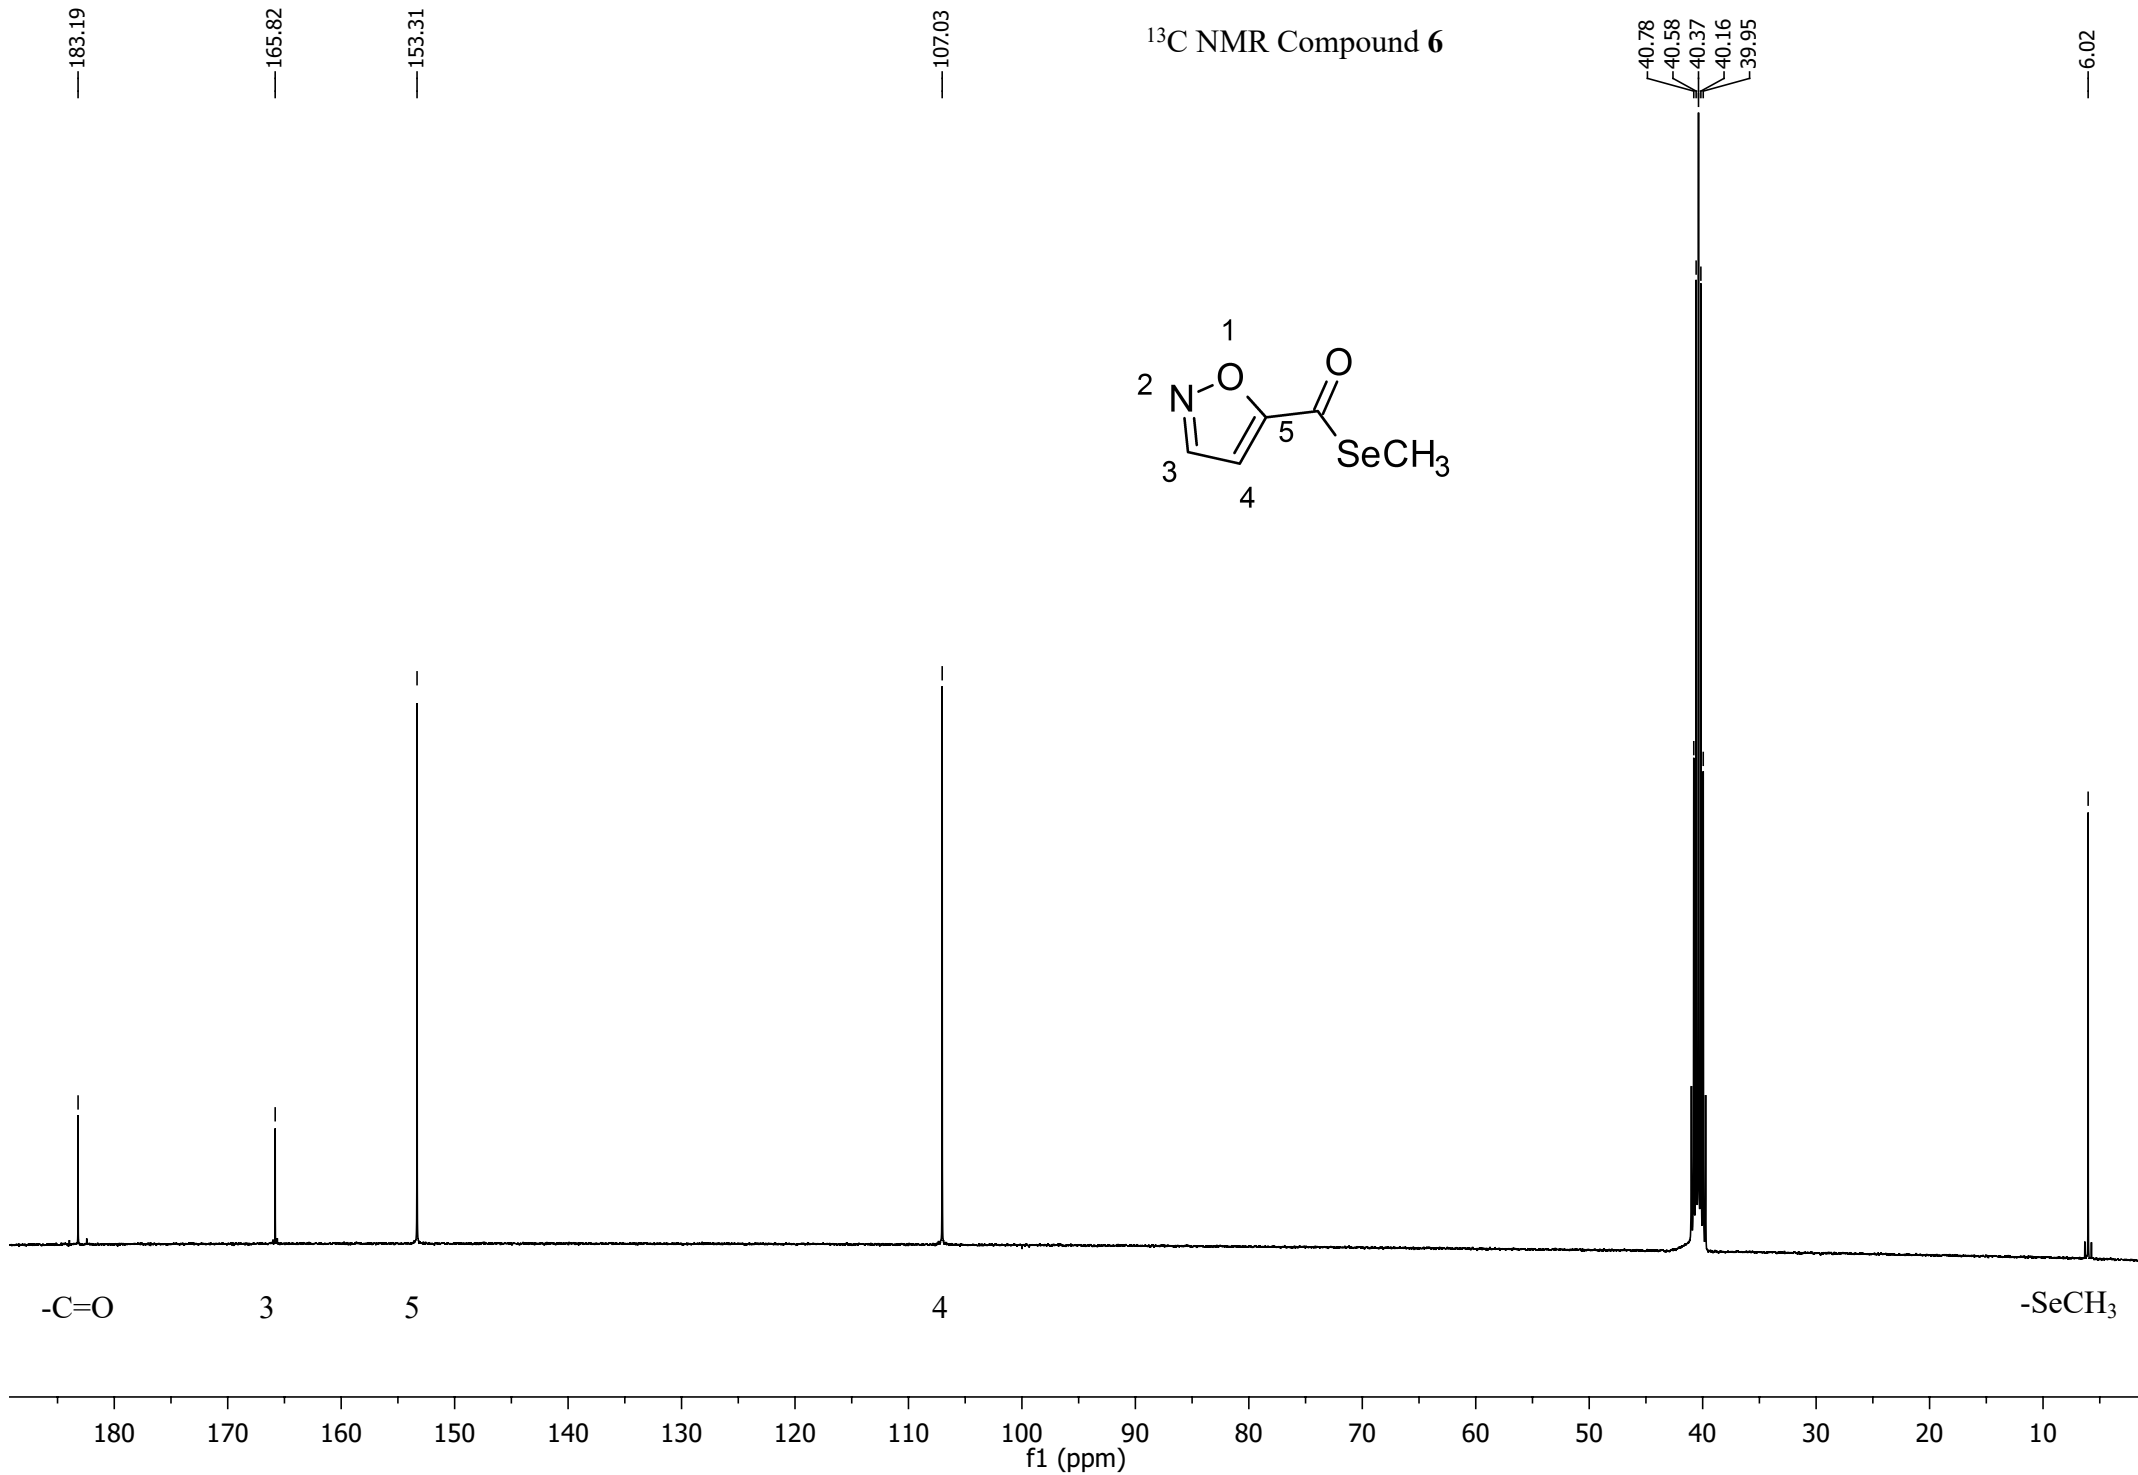

<sup>1</sup>H NMR Compound 7

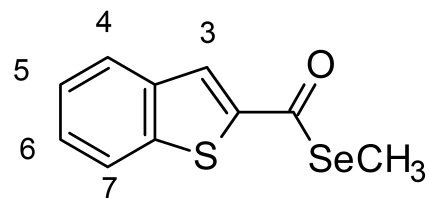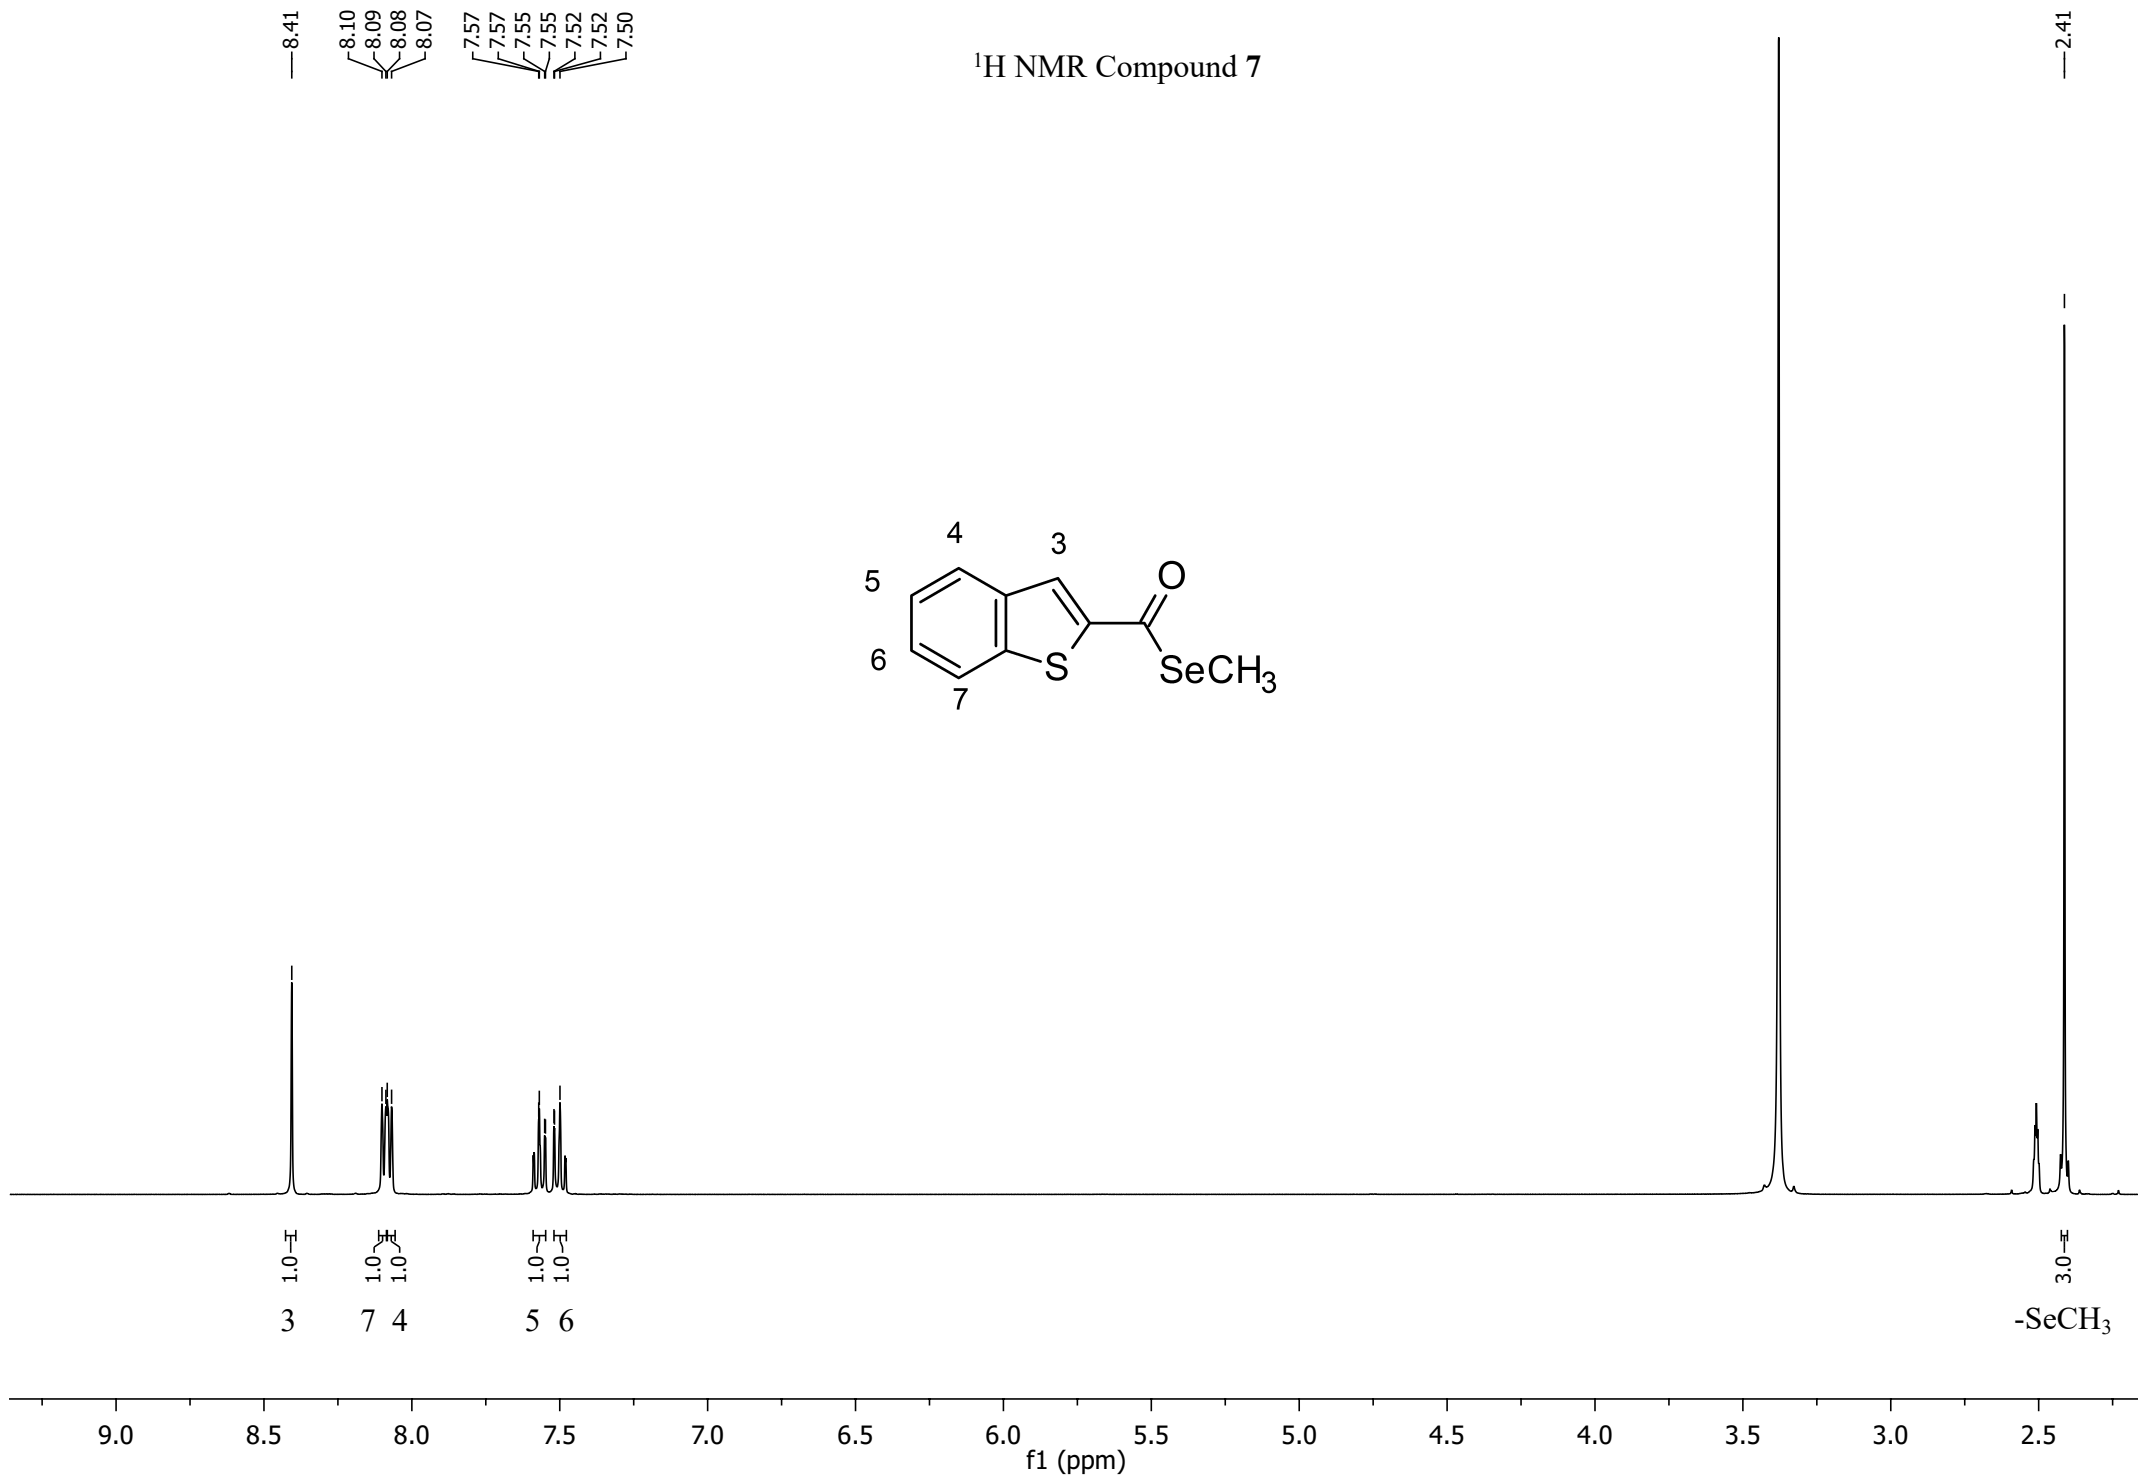

—187.57

142.95  
141.79  
139.34

130.64  
128.86  
127.36  
126.44  
124.11

### $^{13}\text{C}$ NMR Compound 7

40.59  
40.39  
40.18

—6.32

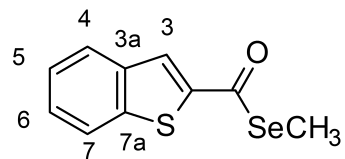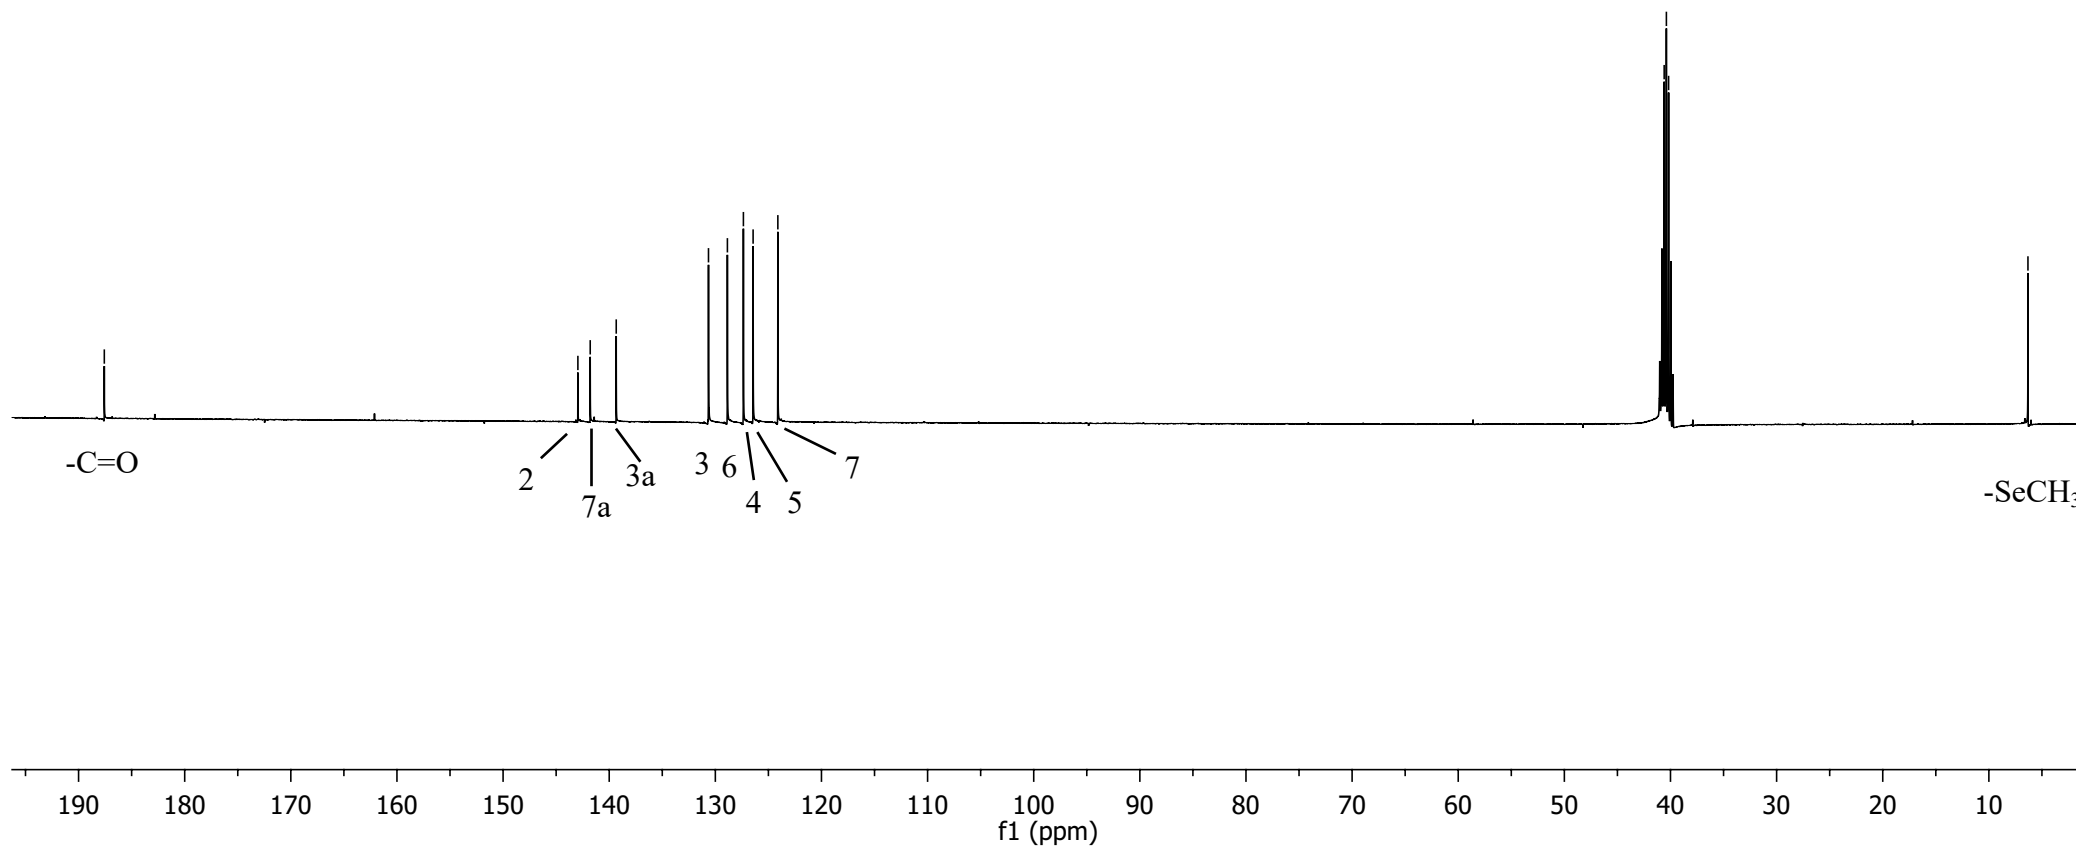

7.56  
7.54  
7.35  
7.26

6.85  
6.83

6.05

<sup>1</sup>H NMR Compound 8

2.36

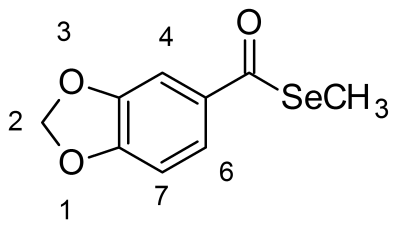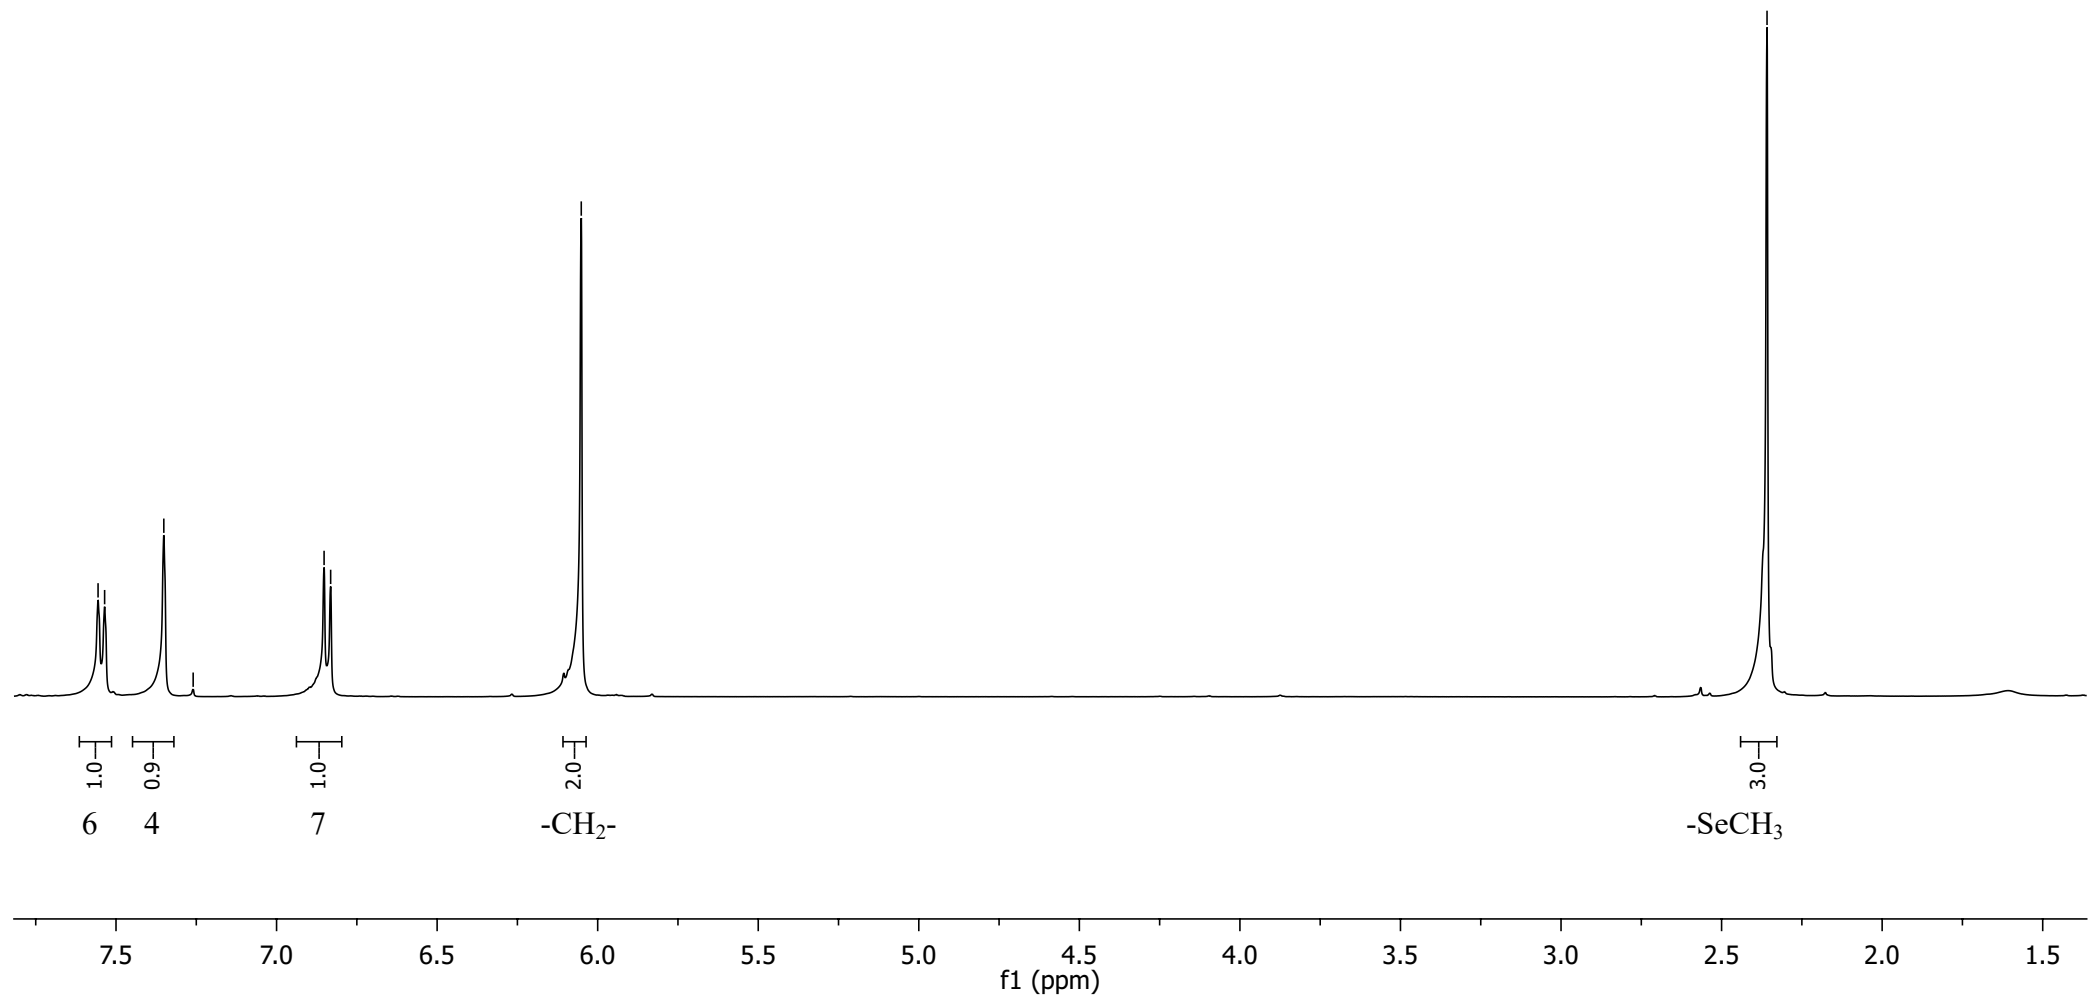



—192.32

—151.79

—147.83

—133.21

—123.19

—107.77

—106.48

—101.68

—77.00

—76.68

—76.36

<sup>13</sup>C NMR Compound **8**

—4.87

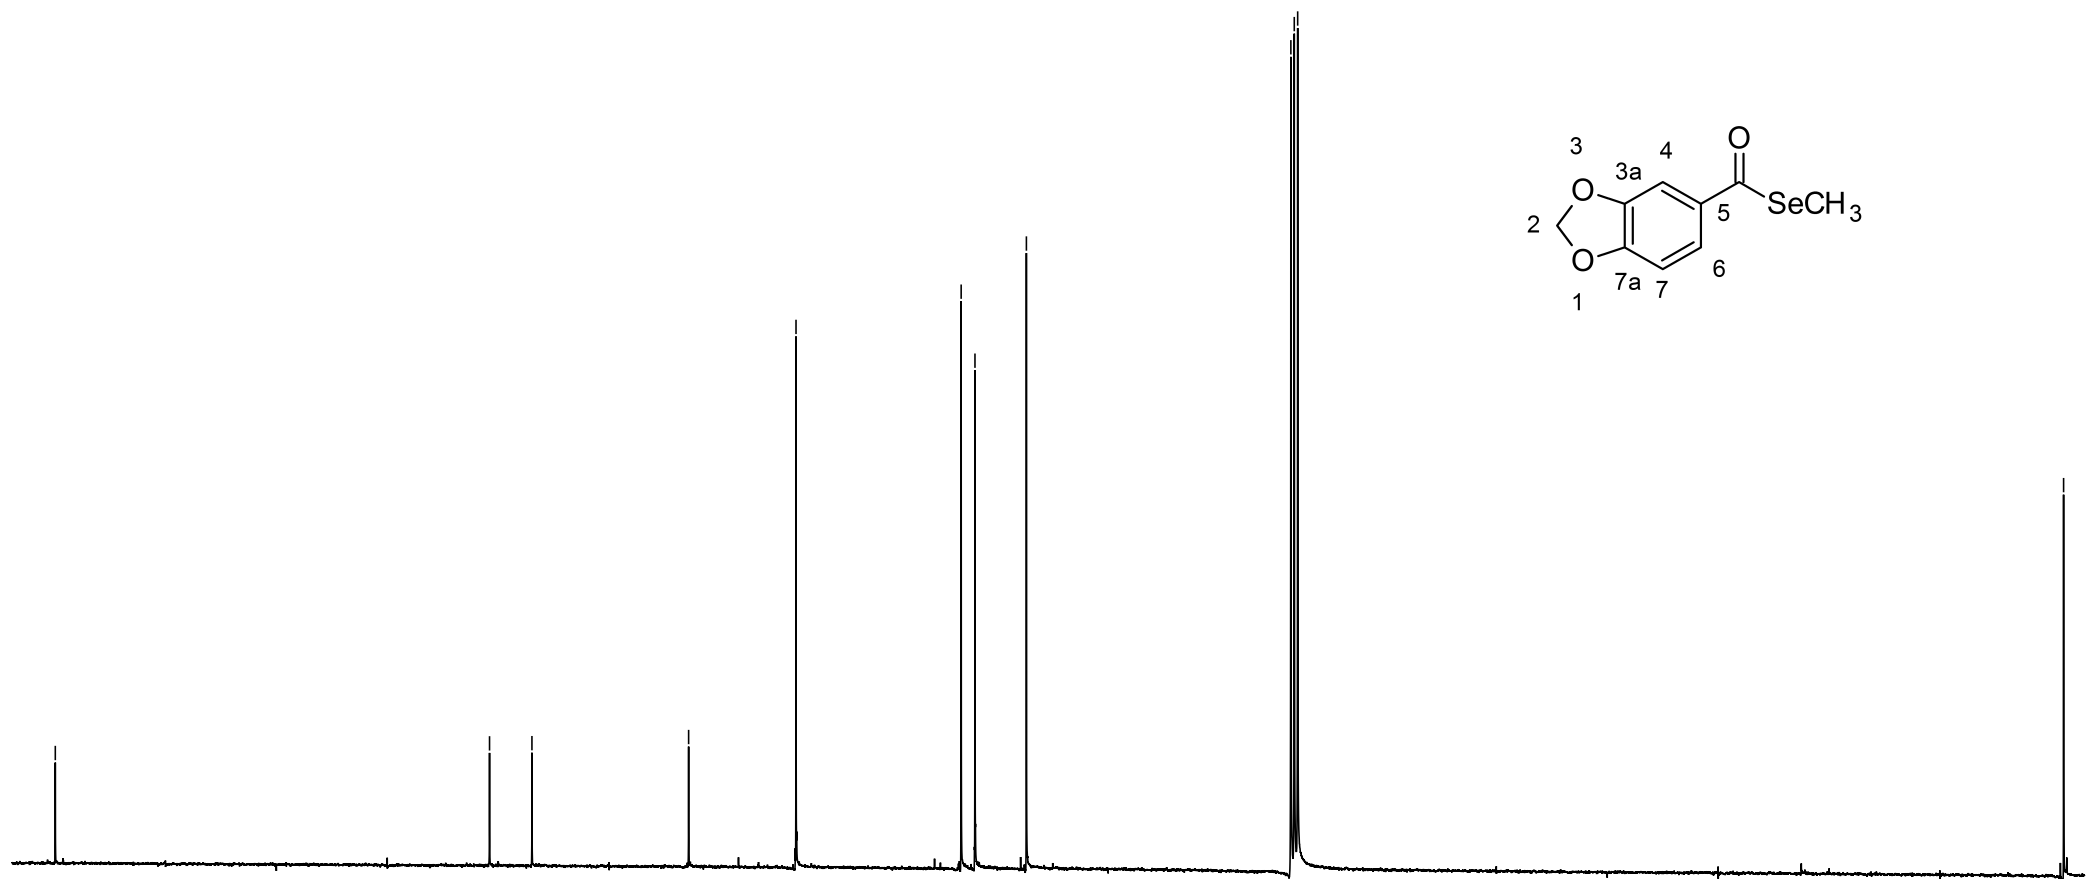

-C=O

7a 3a

5

6

4

7

2

-SeCH<sub>3</sub>

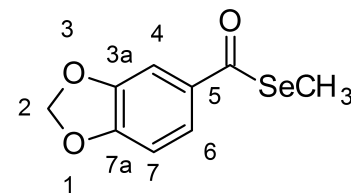

f1 (ppm)

—9.35

—8.72

8.22  
8.20  
8.00  
7.98  
7.89  
7.88  
7.86  
7.68  
7.66  
7.64

—2.48

### <sup>1</sup>H NMR Compound 9

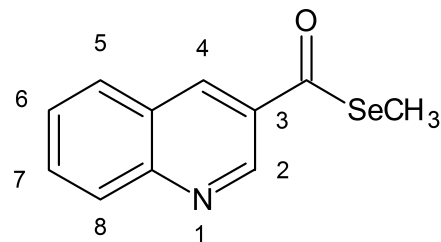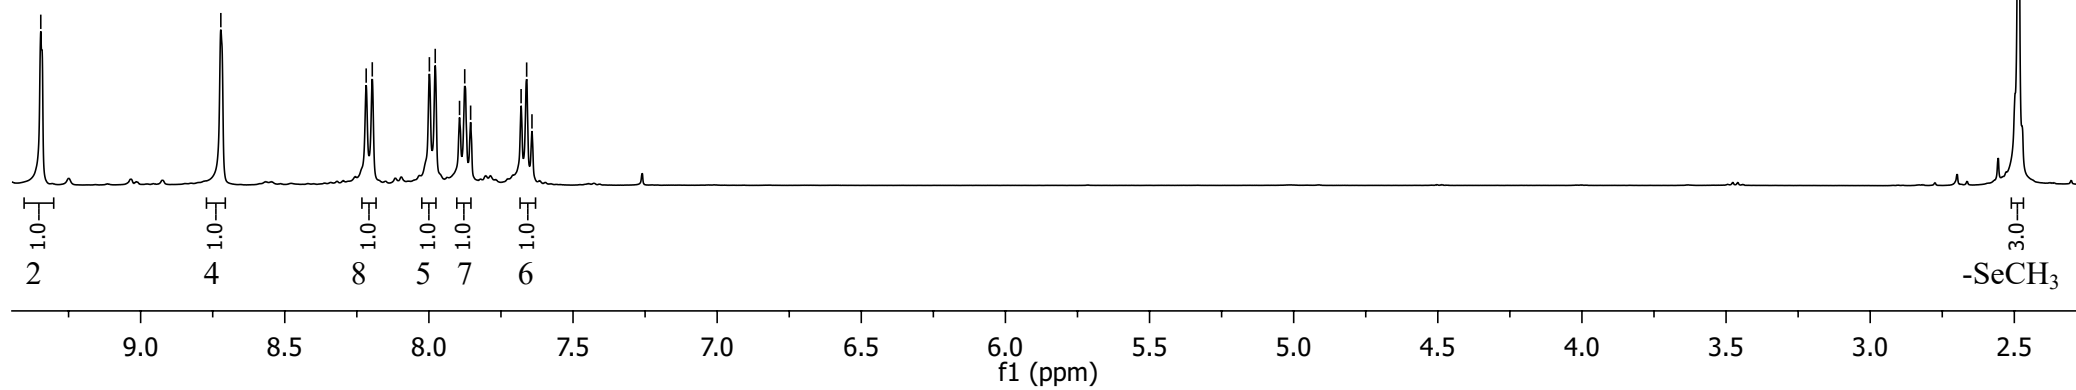

—193.47

—149.87  
—147.48

136.90  
132.88  
131.96  
129.82  
129.49  
128.48  
127.40

<sup>13</sup>C NMR Compound 9

77.77  
77.45  
77.13

—5.99

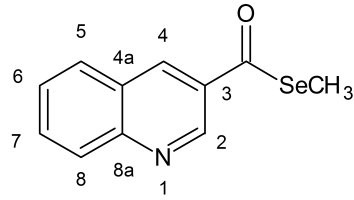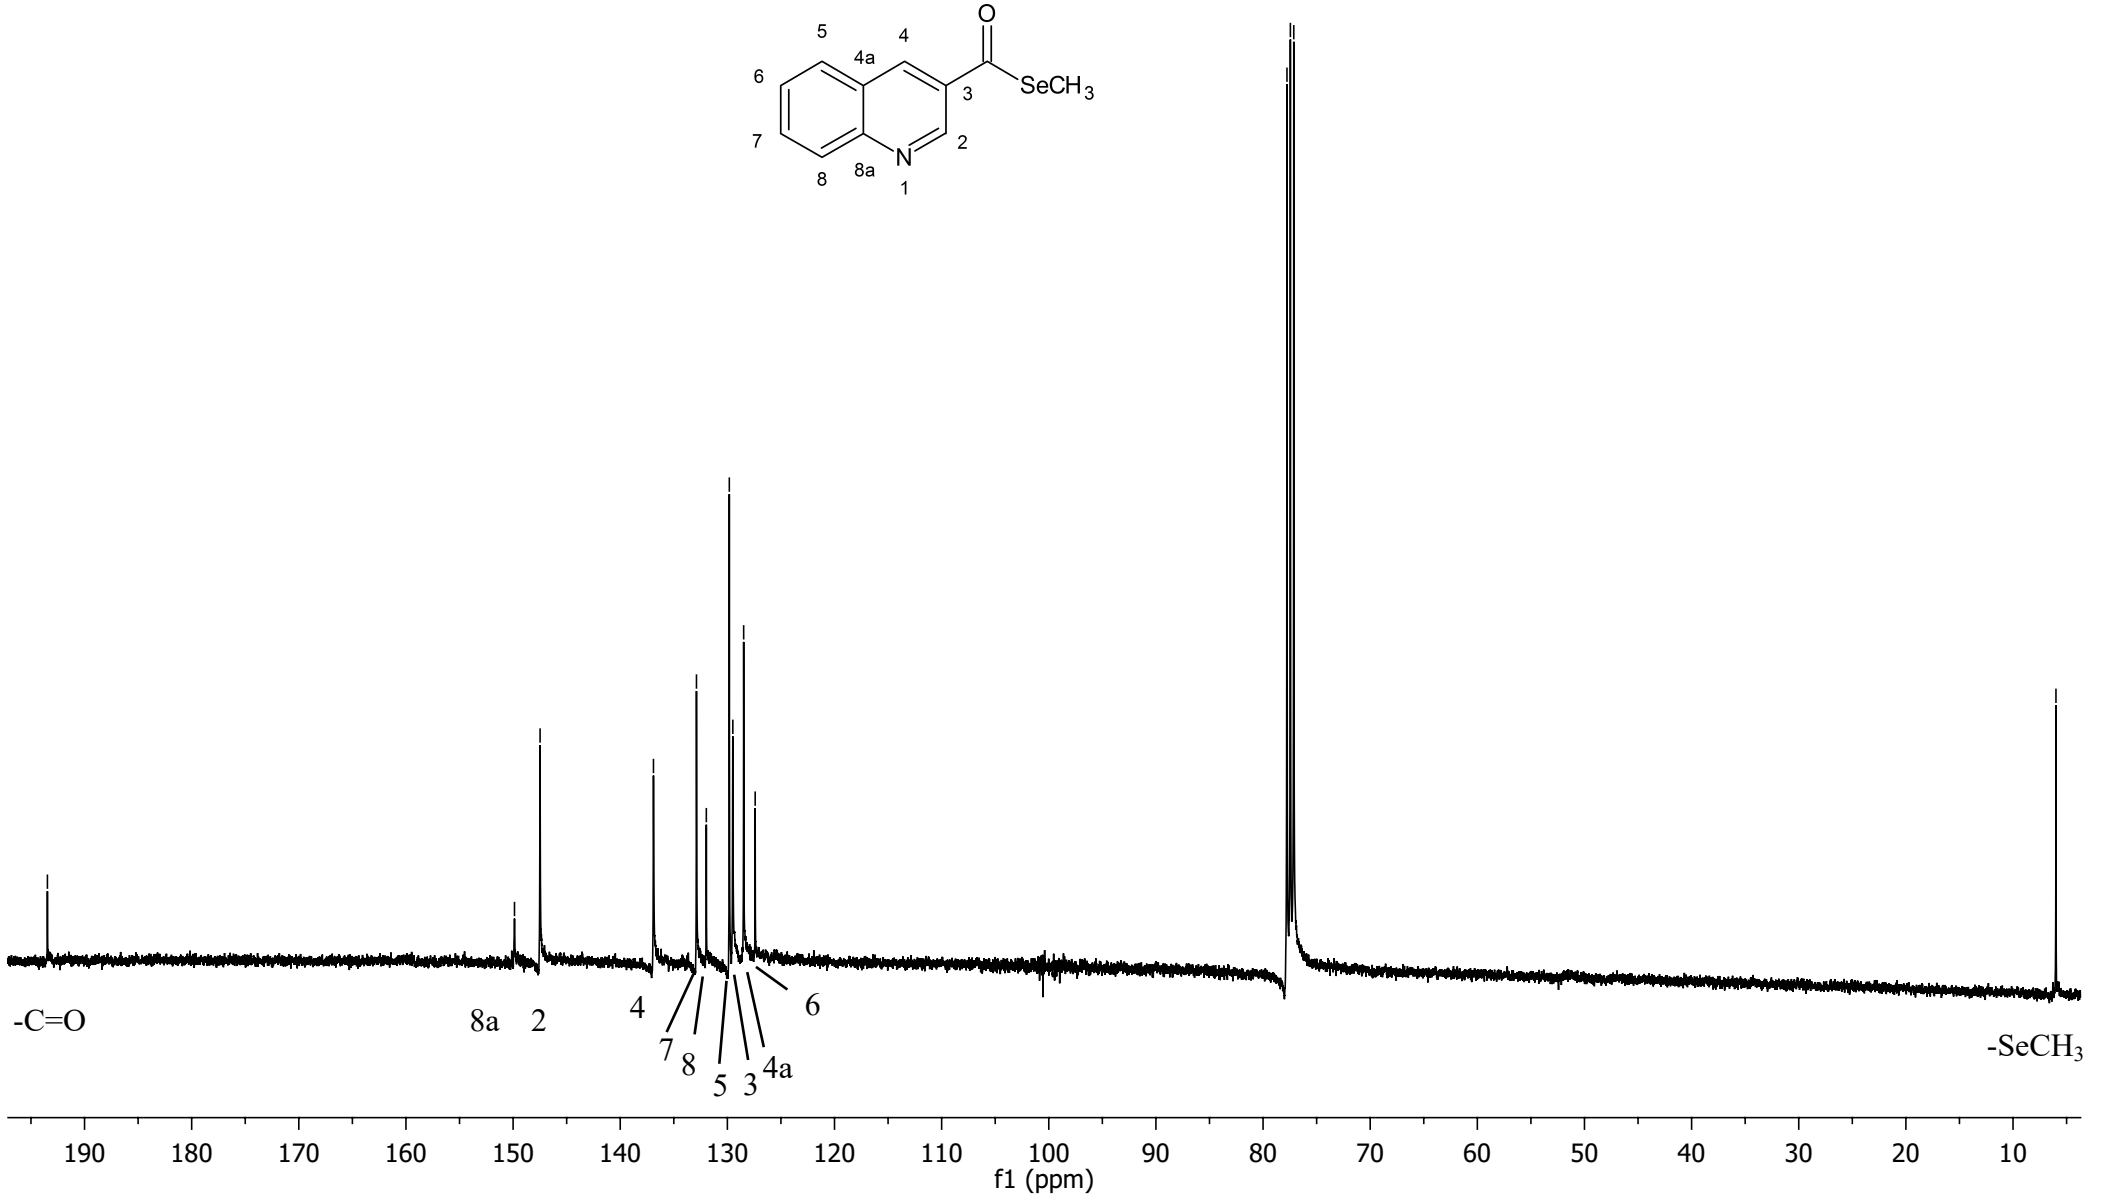

<sup>1</sup>H NMR Compound 10

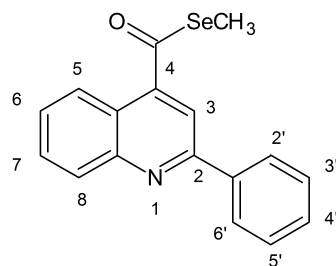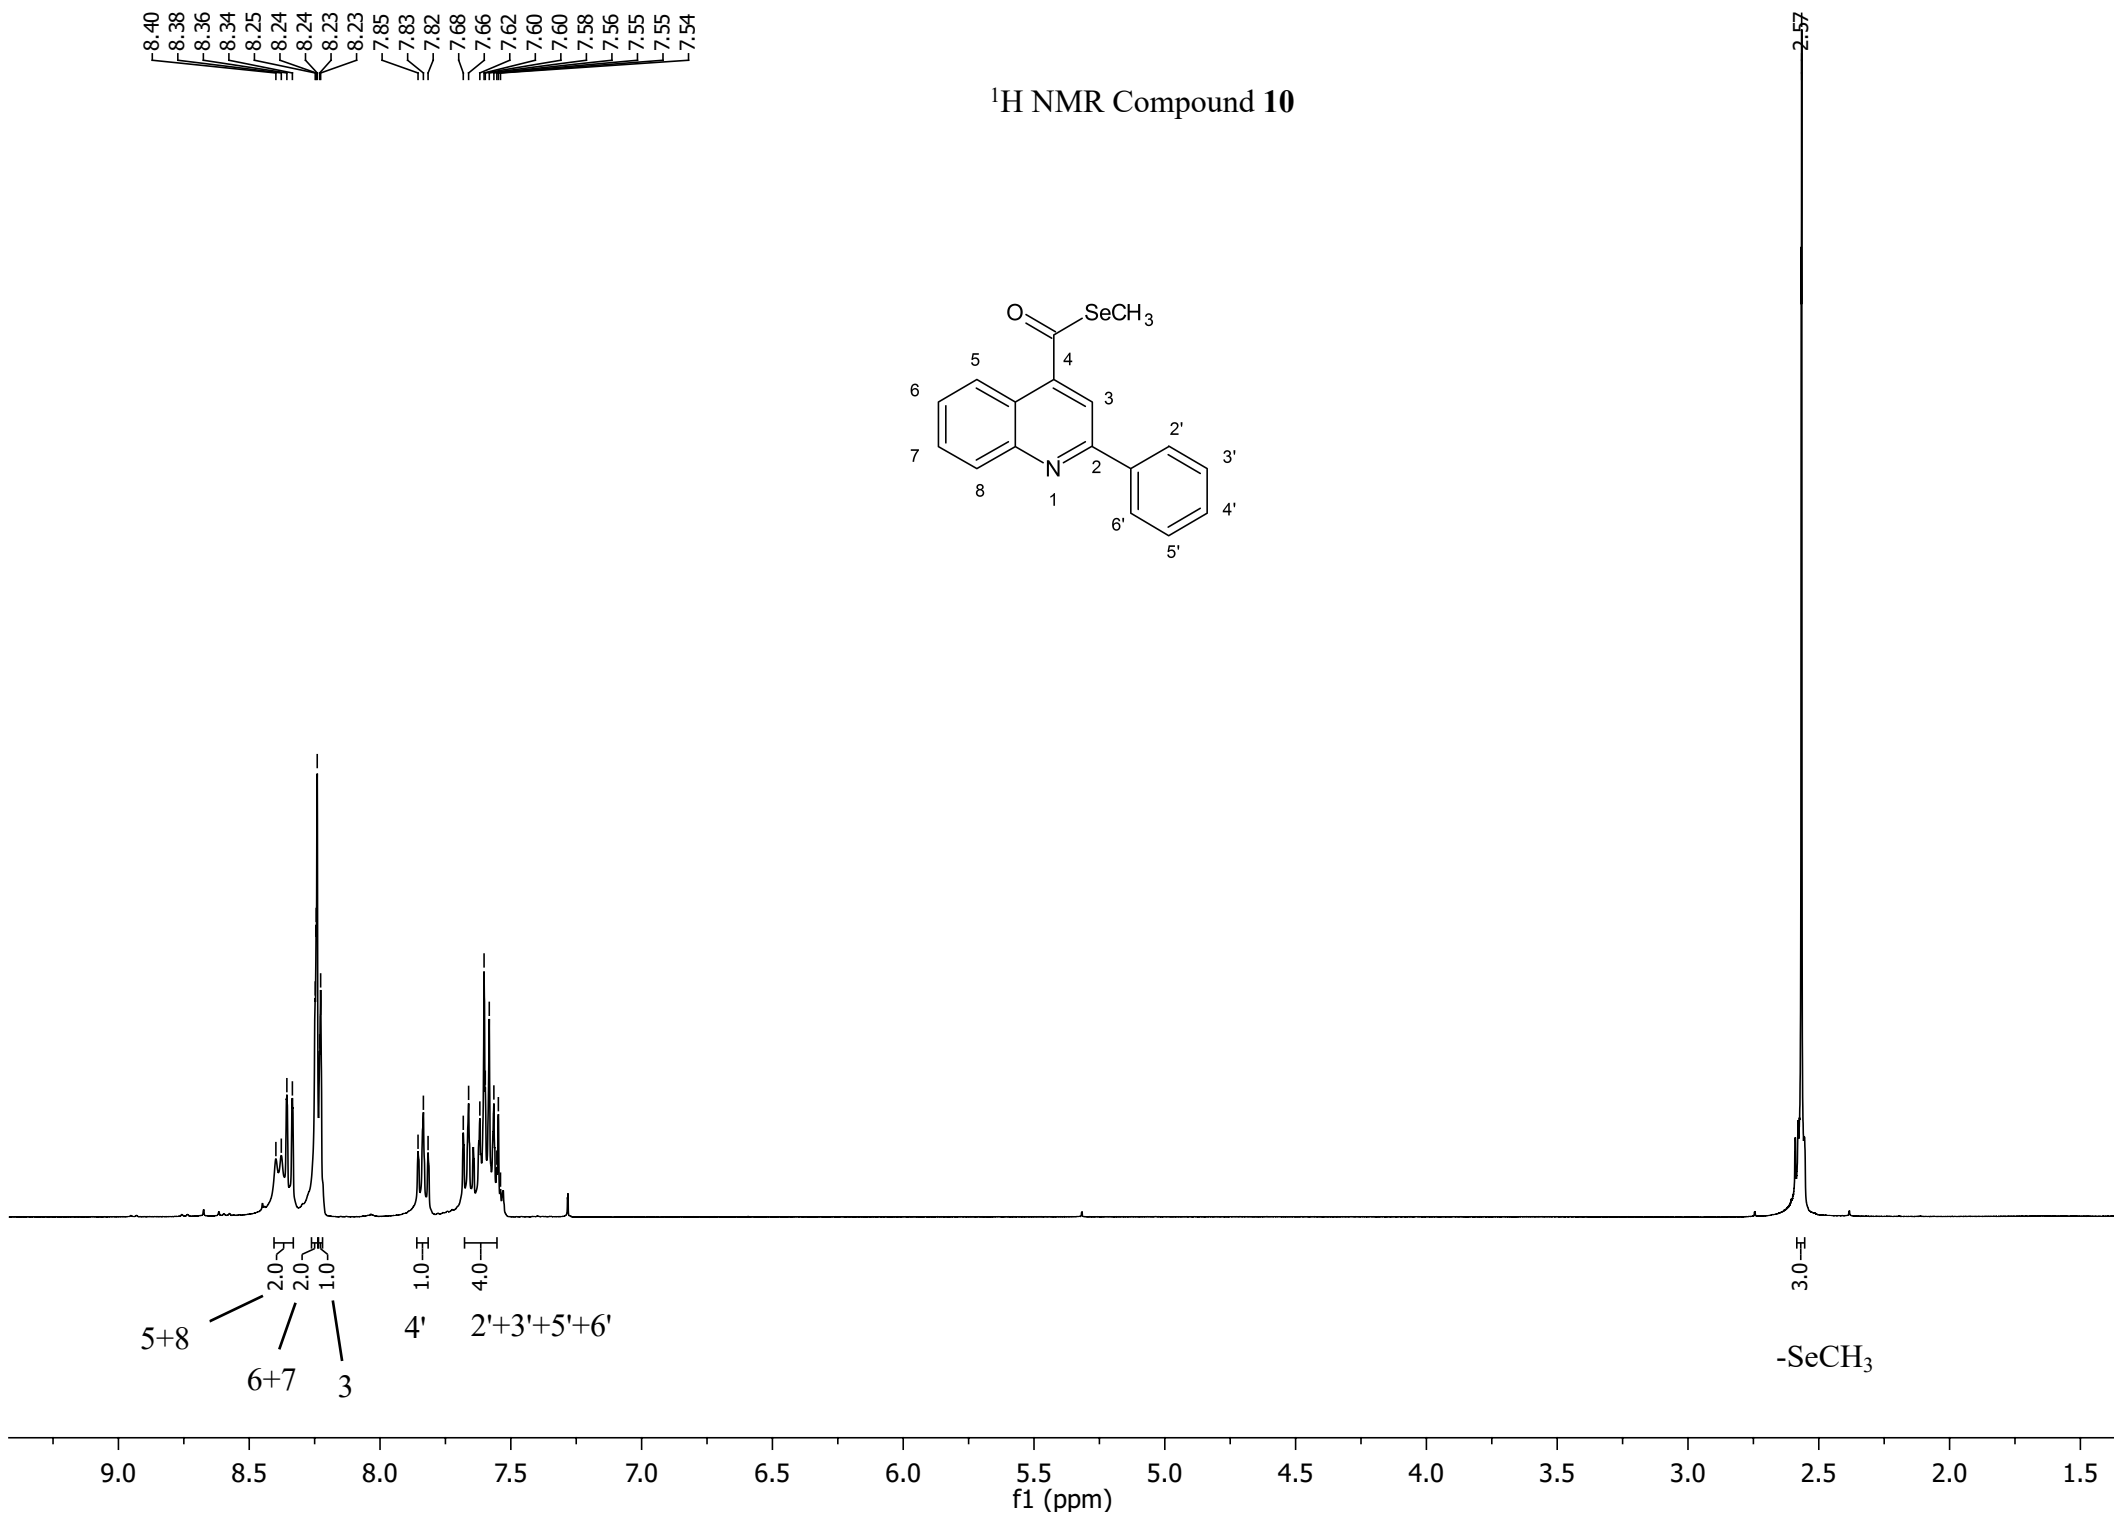

—197.10

—157.26

—148.70

—146.28

—138.17

—131.29

—130.72

—129.82

—129.53

—128.77

—128.22

—125.25

—121.40

—117.85

<sup>13</sup>C NMR Compound 10

—7.28

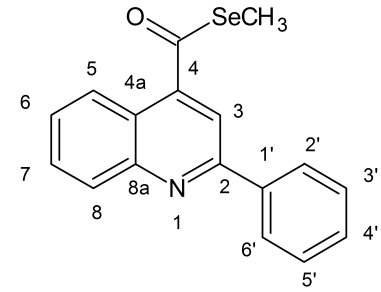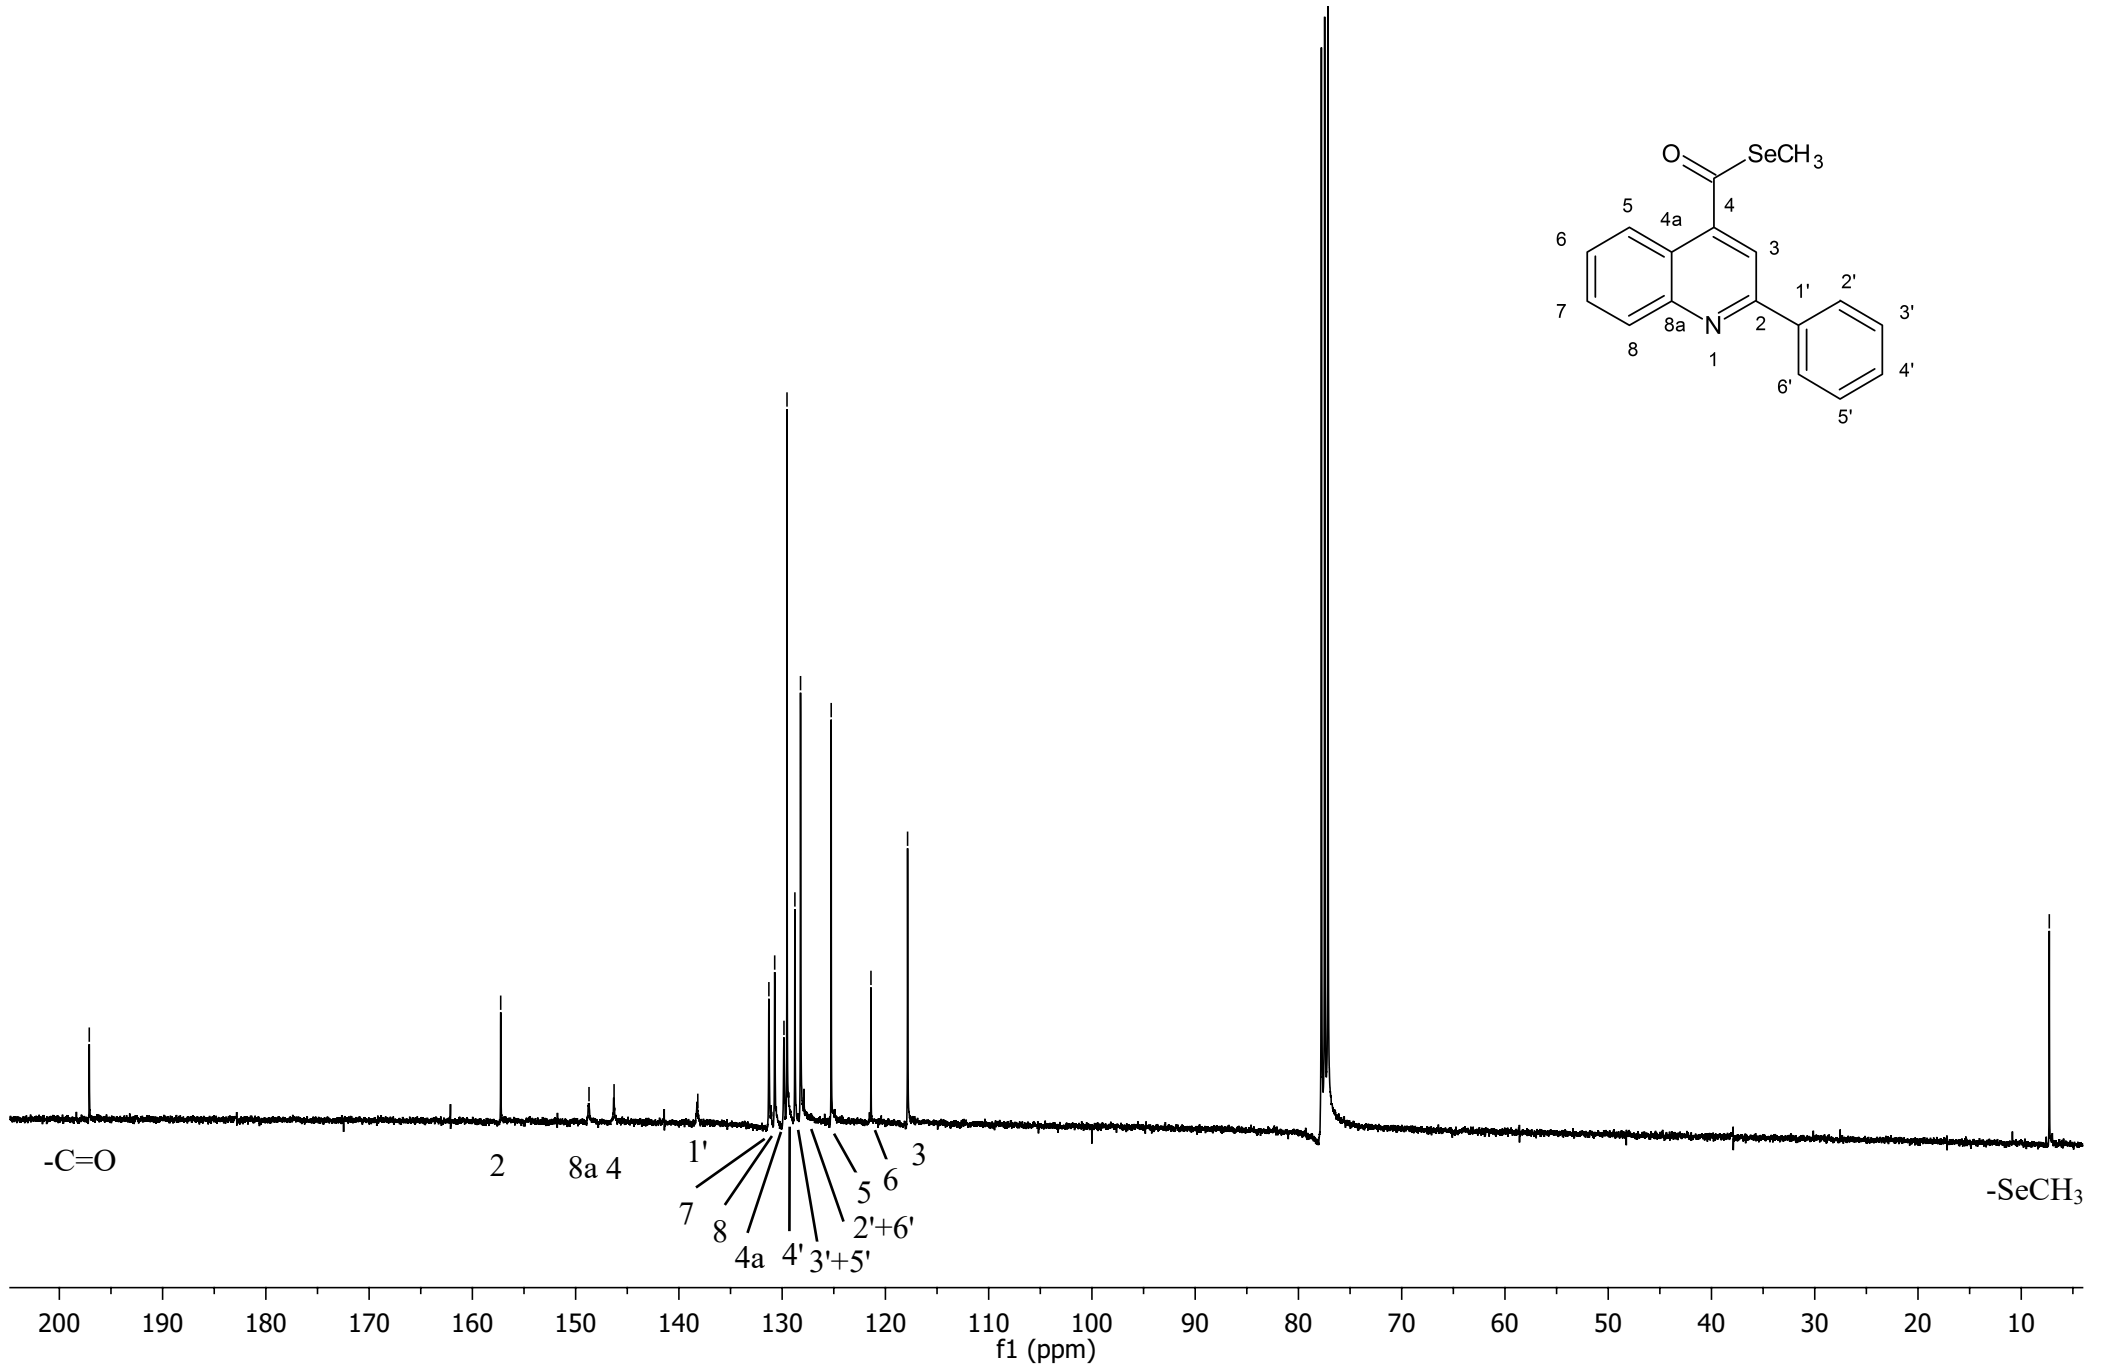

<sup>1</sup>H NMR Compound 11

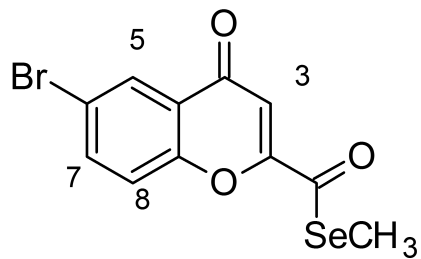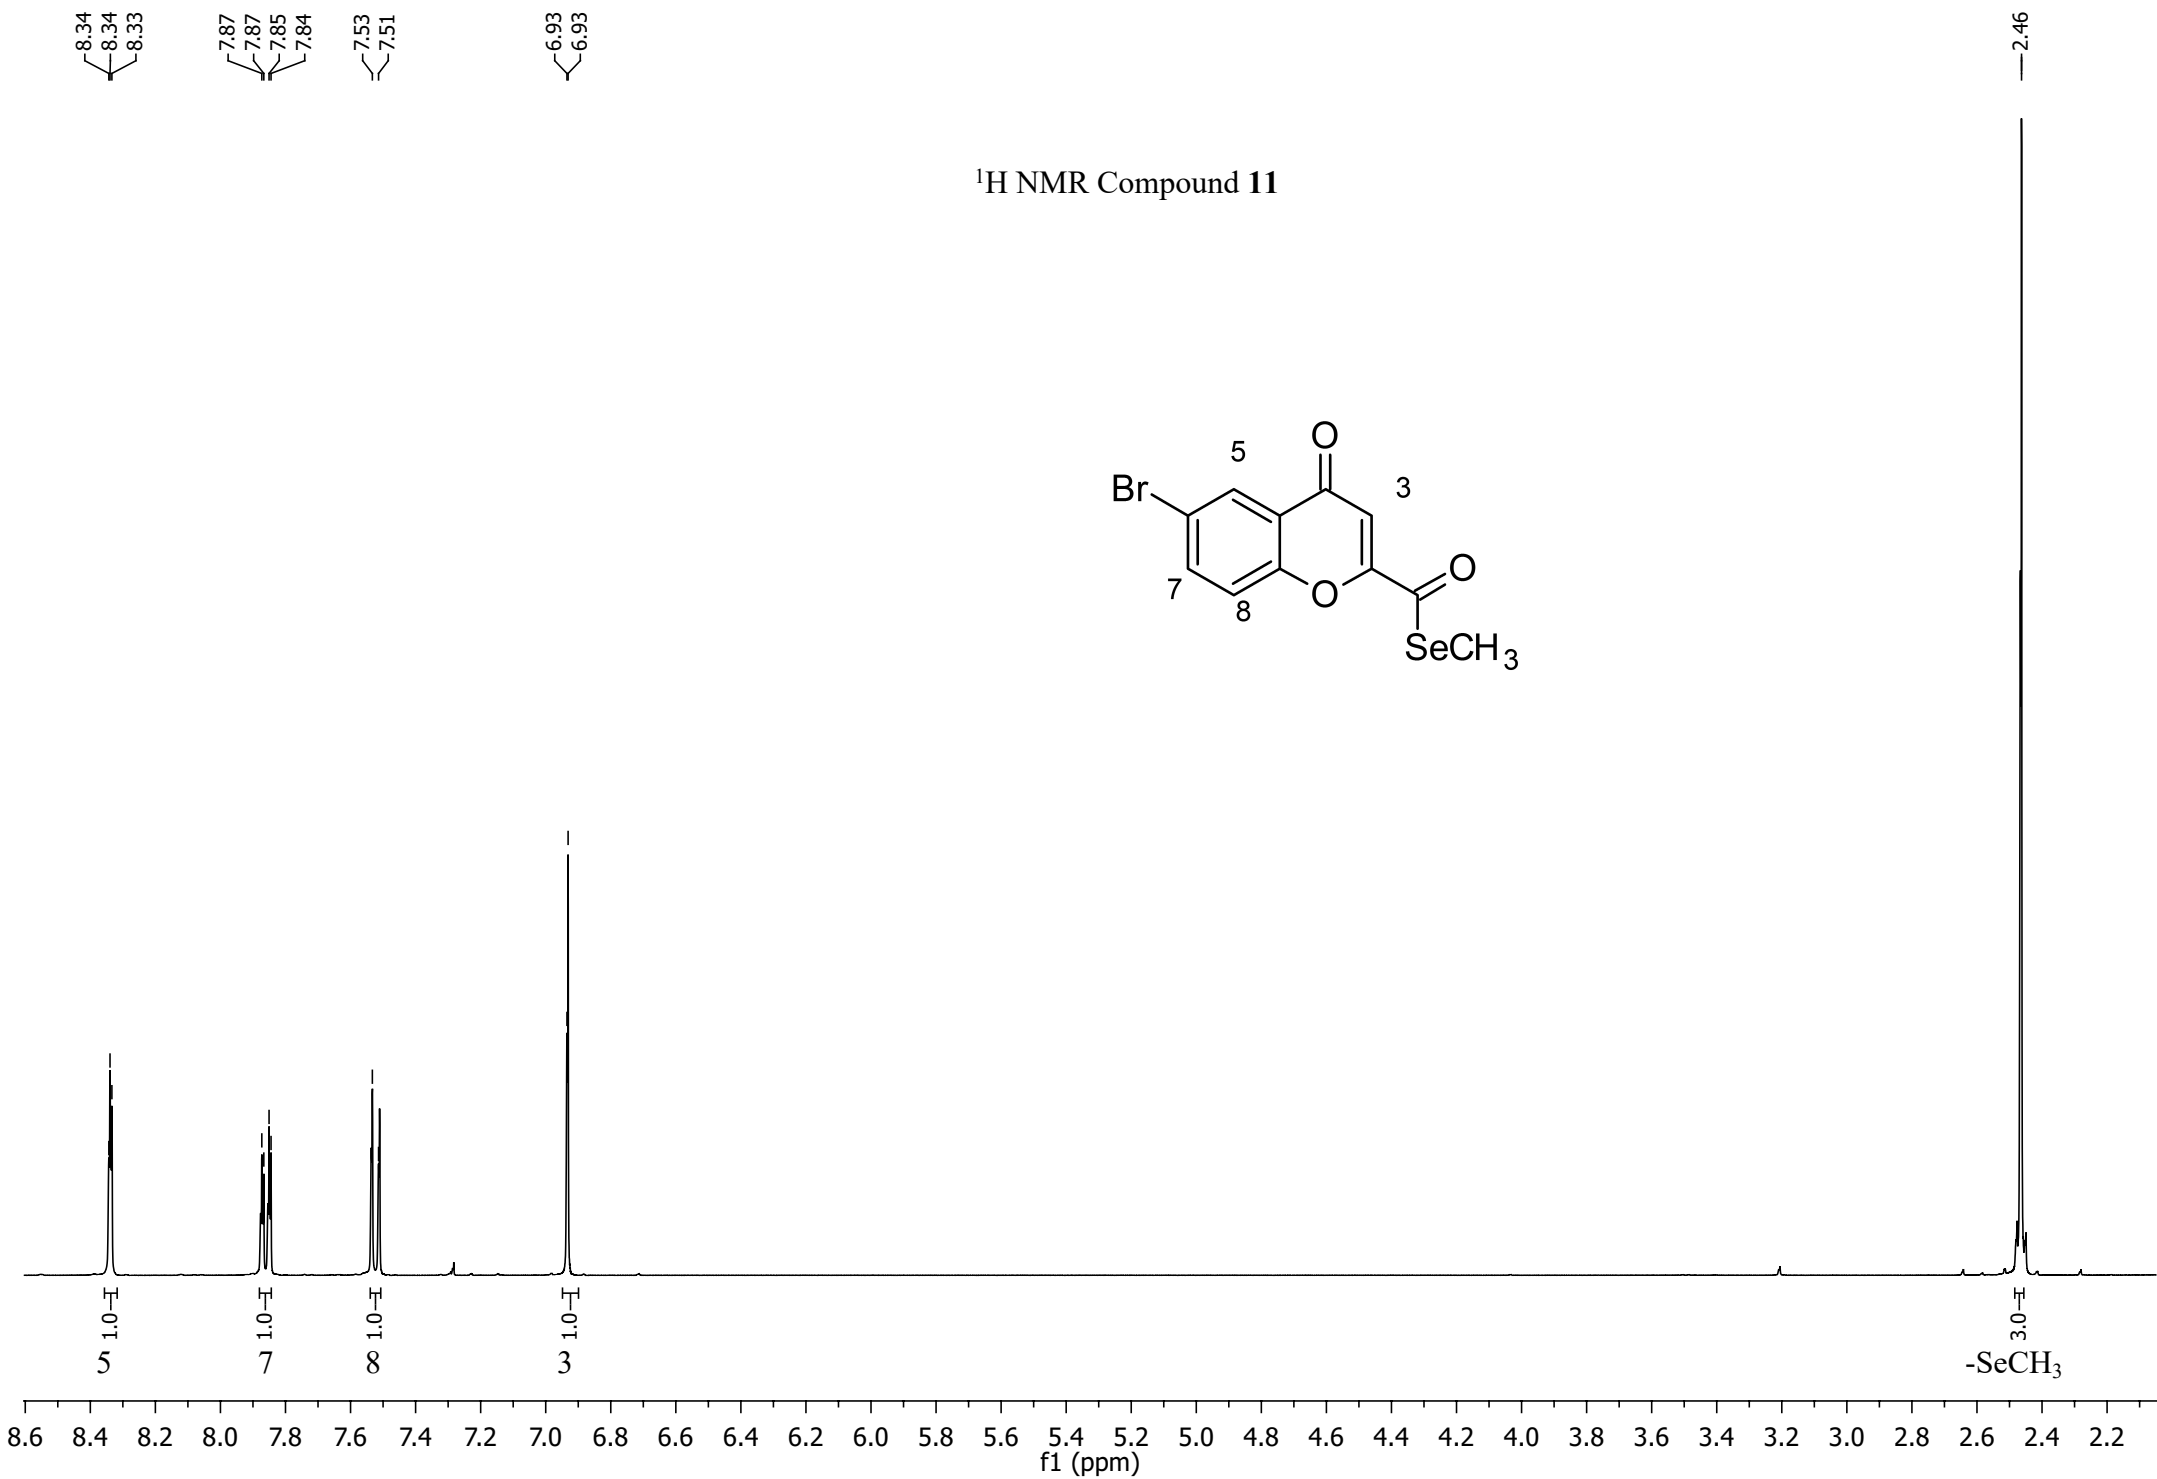

—190.55

—177.15

—157.09  
—154.58

—138.23

—129.04  
—126.25

—120.88  
—120.19

—108.98

—77.77  
—77.45  
—77.13

### <sup>13</sup>C NMR Compound 11

—5.66

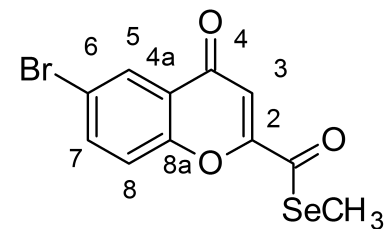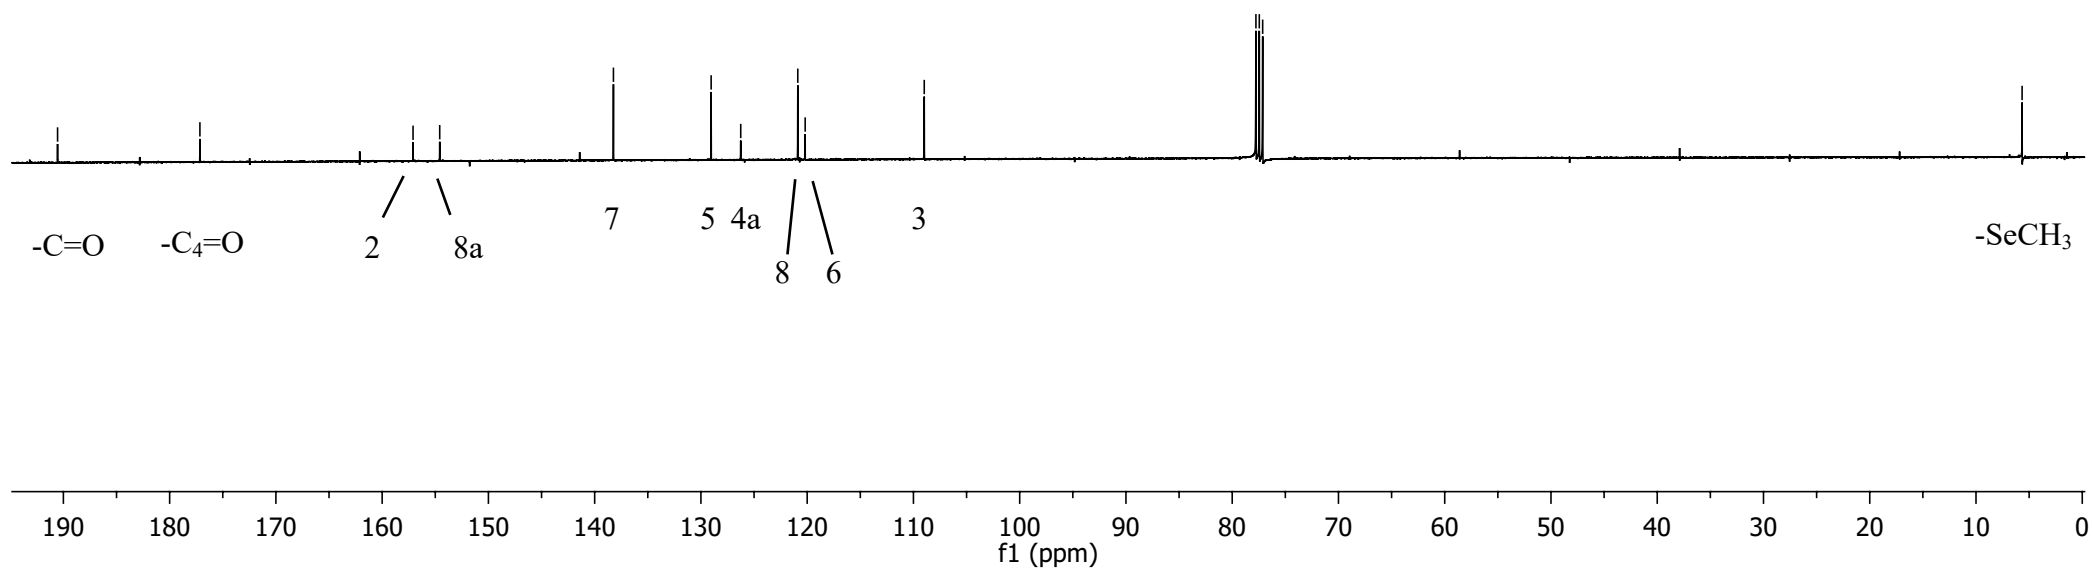

<sup>1</sup>H NMR Compound 12

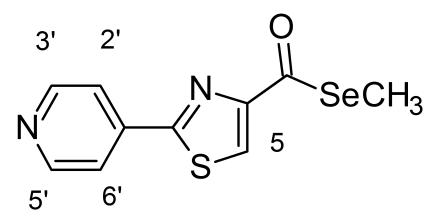

8.82  
8.81

8.20  
8.01  
8.00

2.40

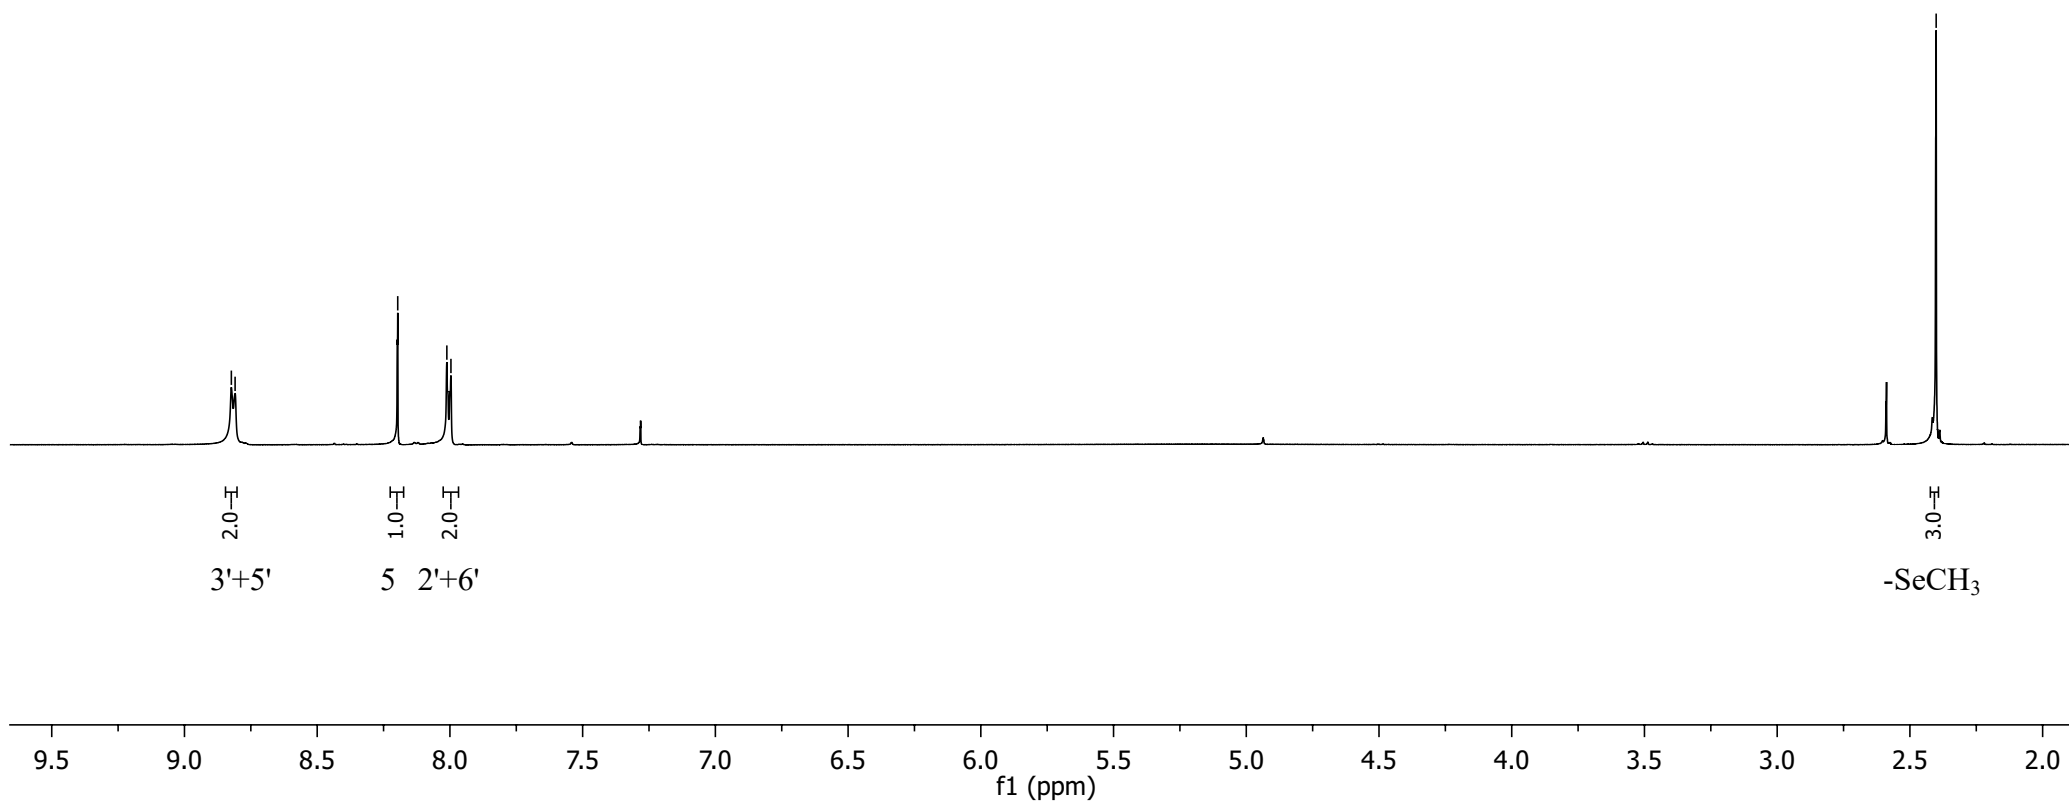



—189.66

—164.89

—156.45

—149.61

—141.11

—122.68

—121.39

77.76

77.44

77.13

<sup>13</sup>C NMR Compound **12**

—5.27

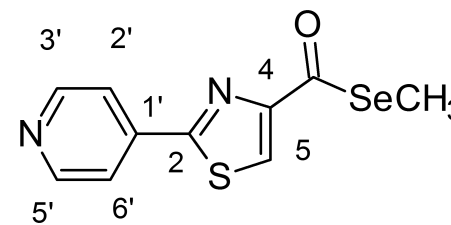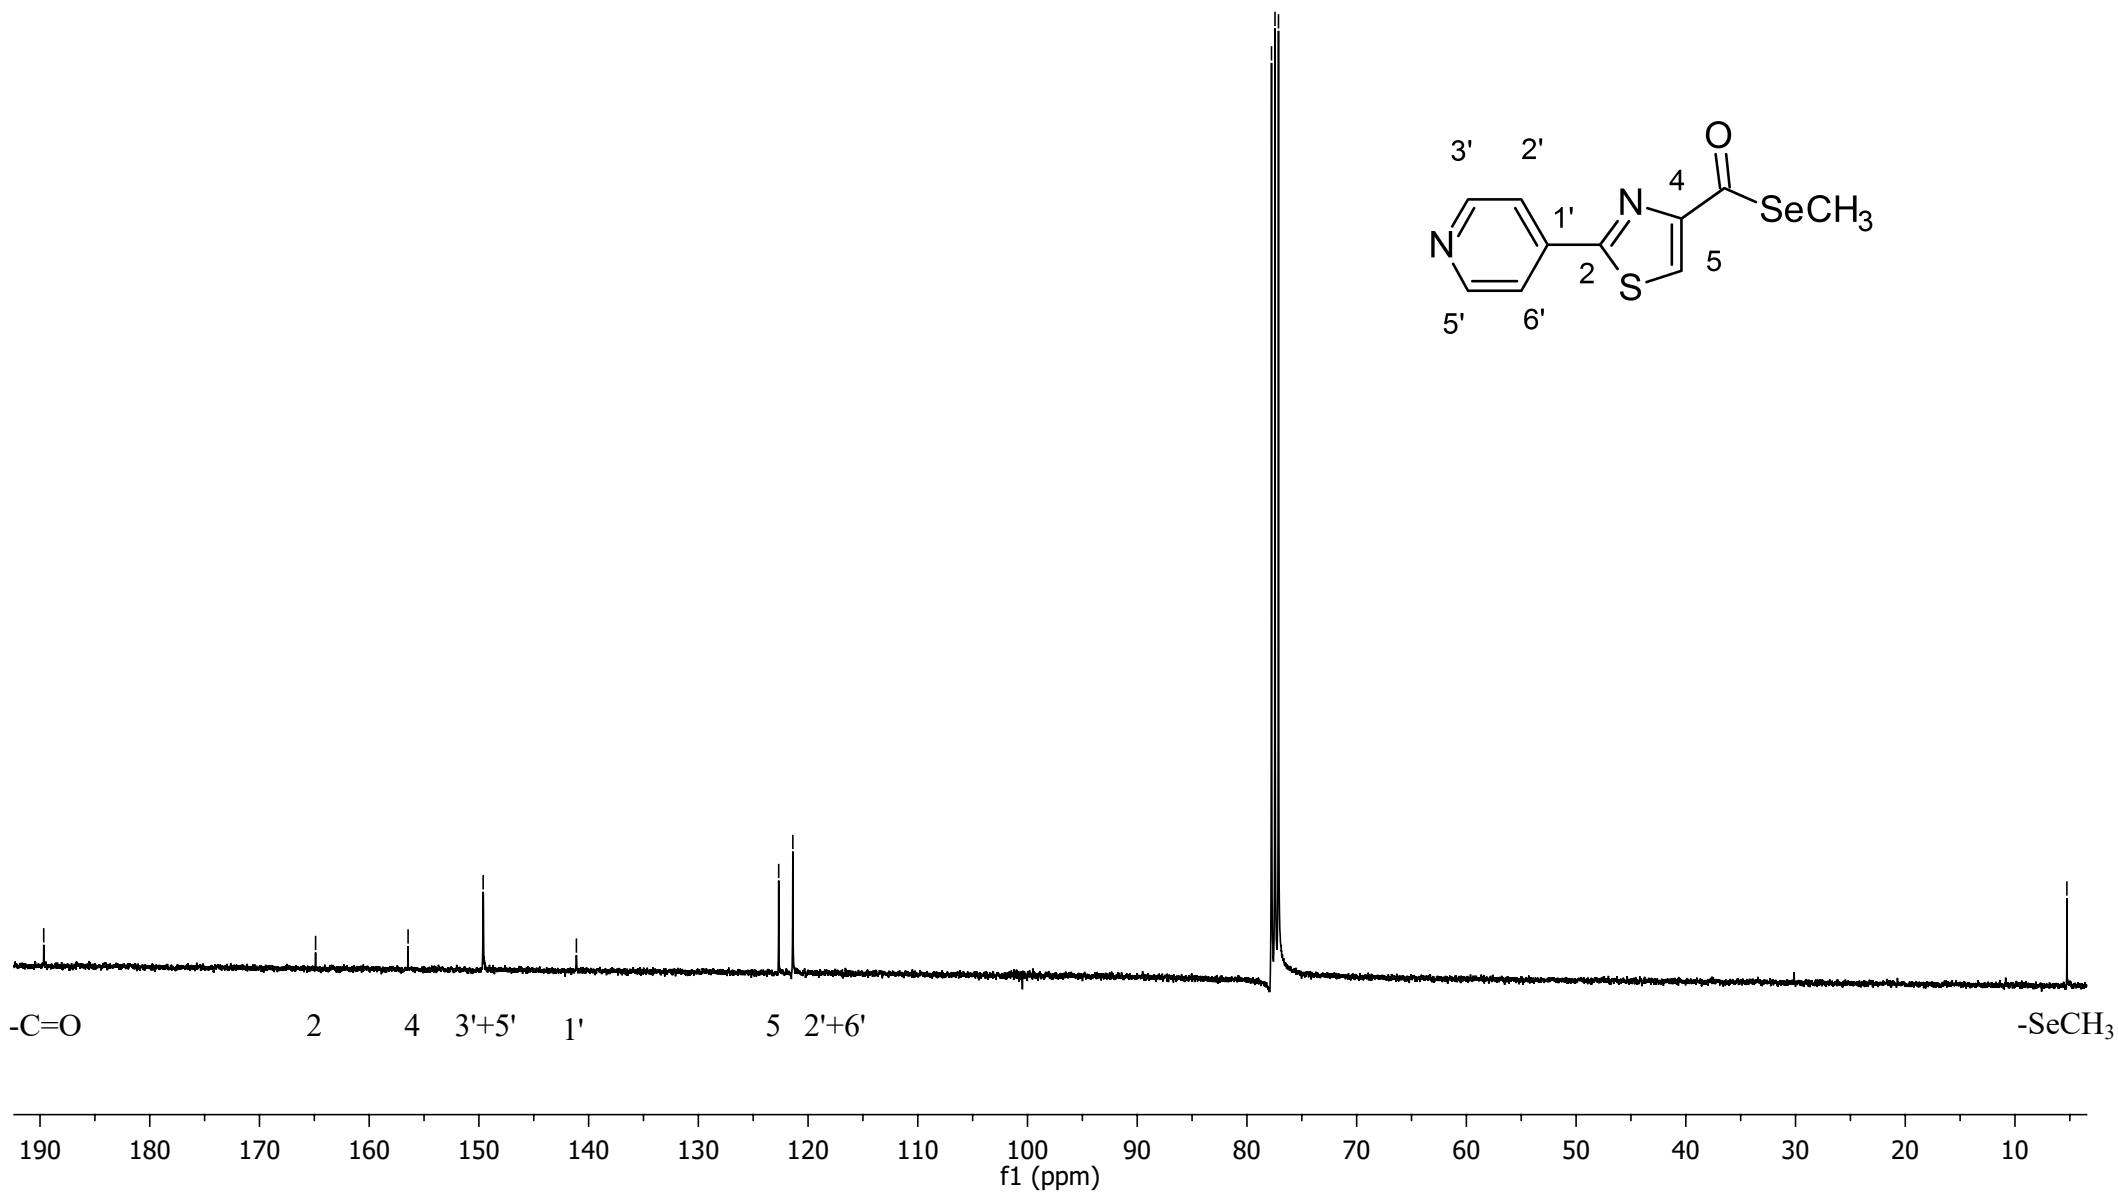

<sup>1</sup>H NMR Compound 13

—2.64

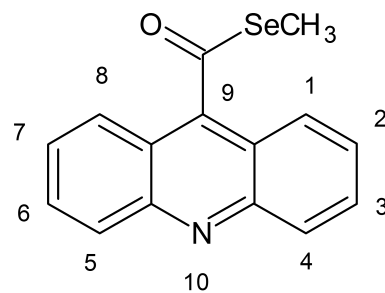

8.32  
8.30  
8.10  
8.08  
7.84  
7.82  
7.80  
7.62  
7.60  
7.58

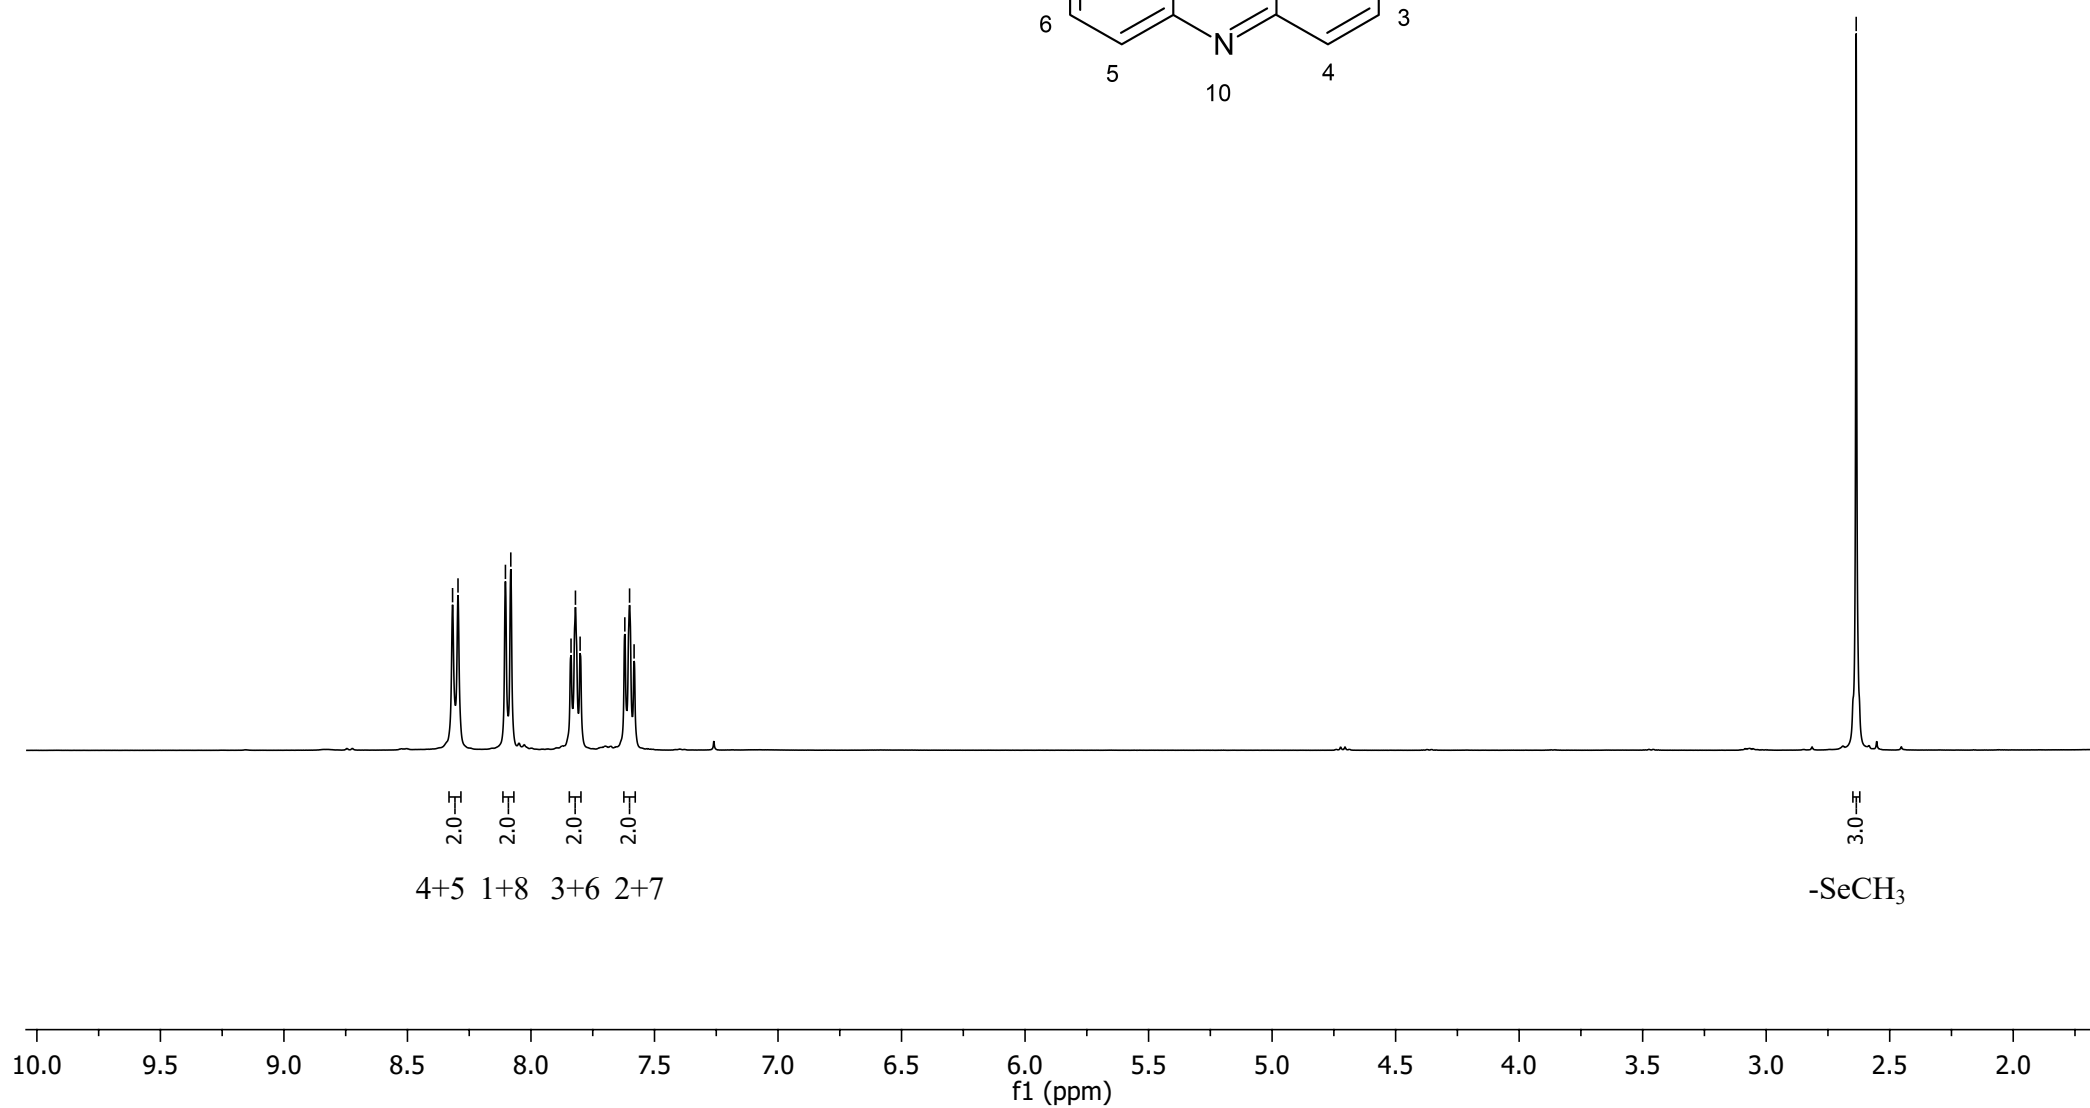

—198.40

—148.05

130.68  
129.19  
126.91  
124.56  
120.24  
120.23

77.18  
76.87  
76.55

### <sup>13</sup>C NMR Compound 13

—6.86

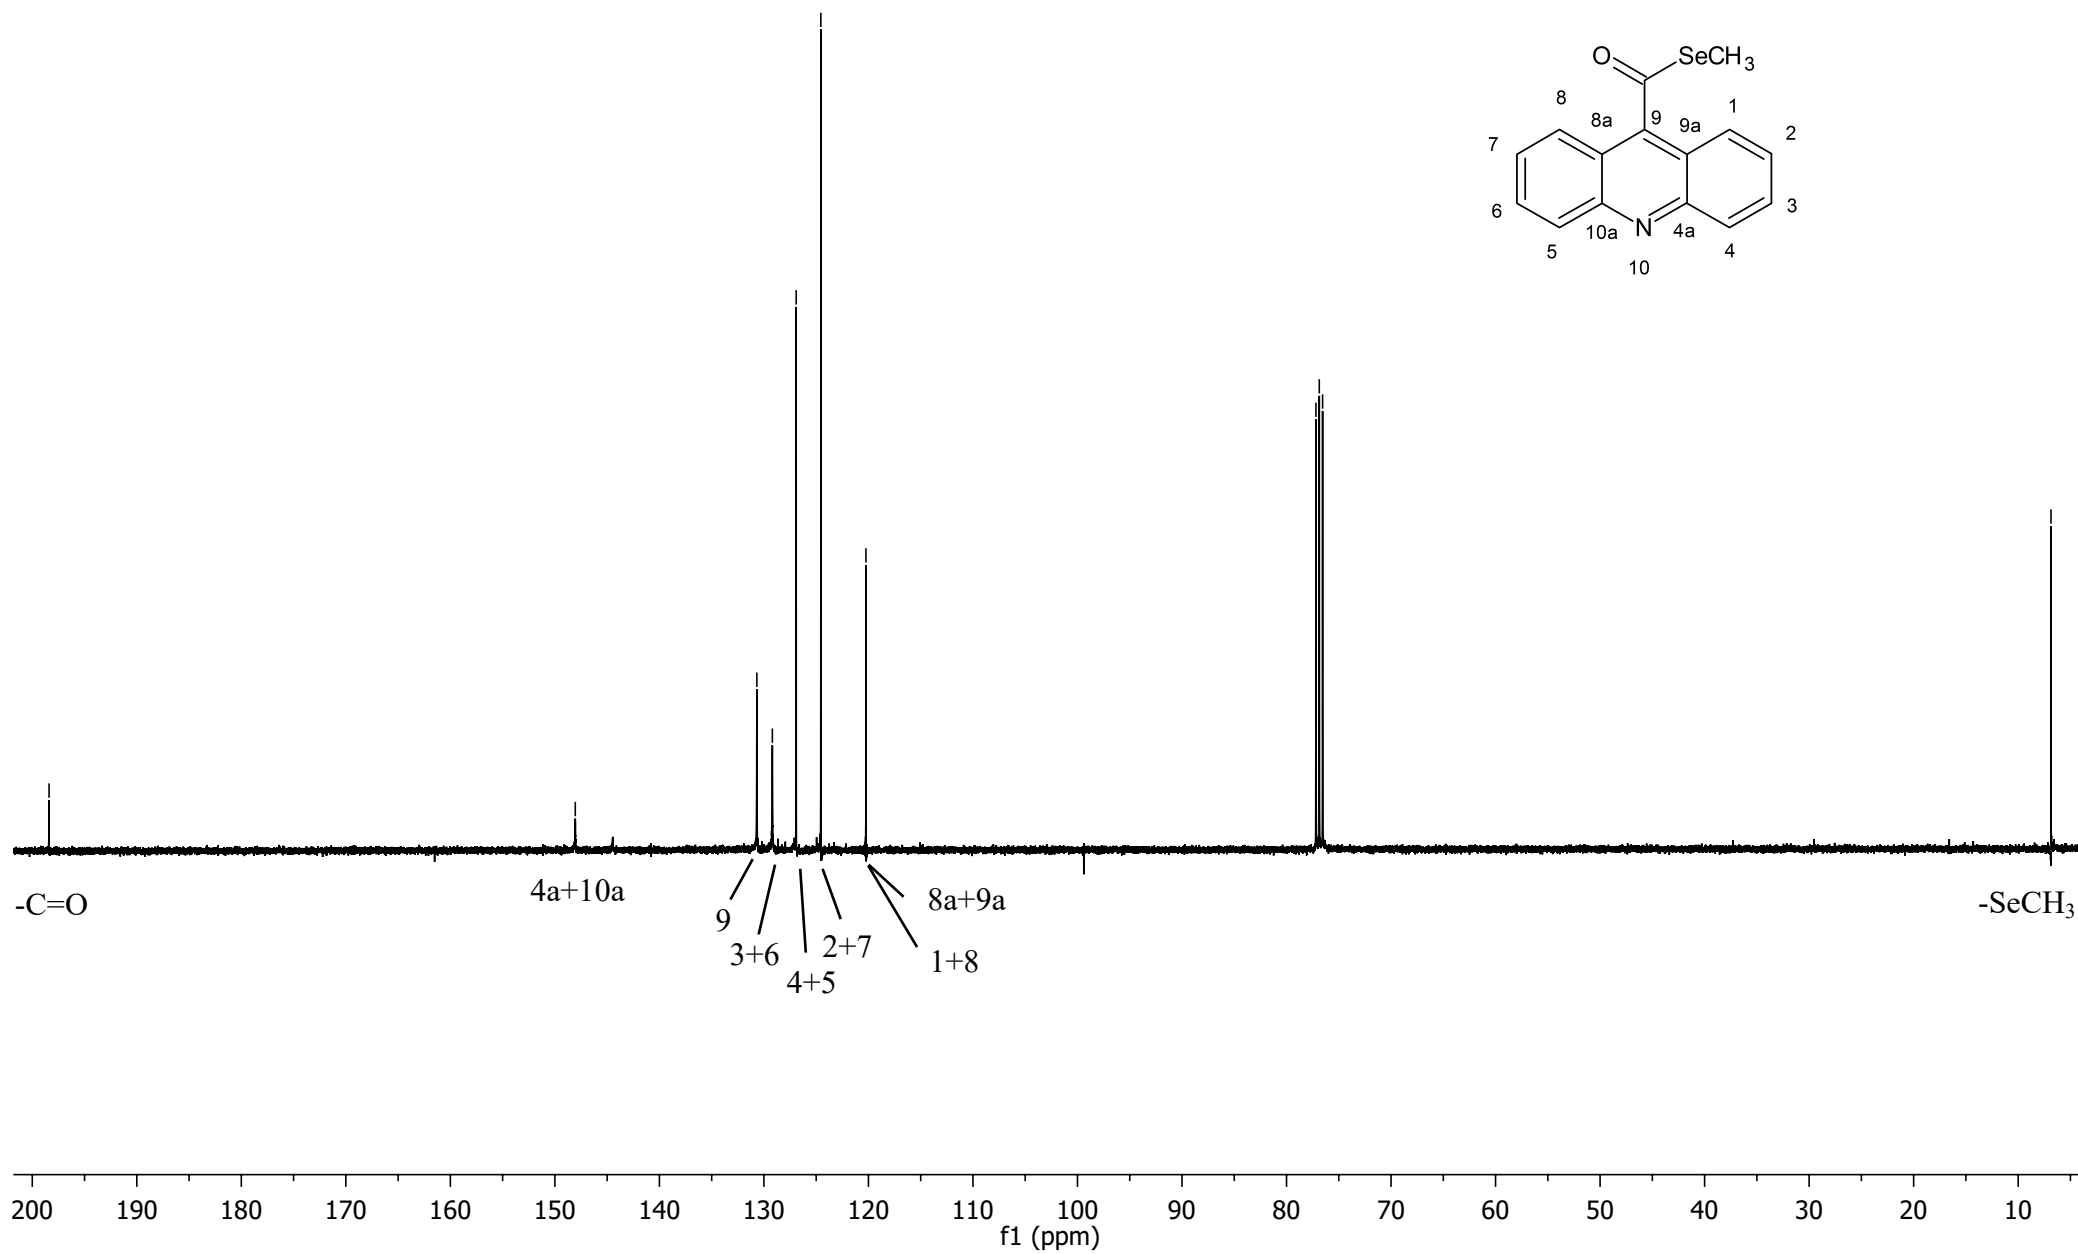

<sup>1</sup>H NMR Compound 14

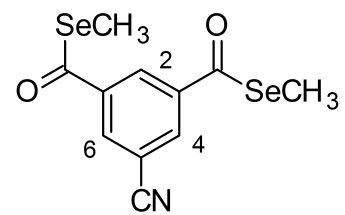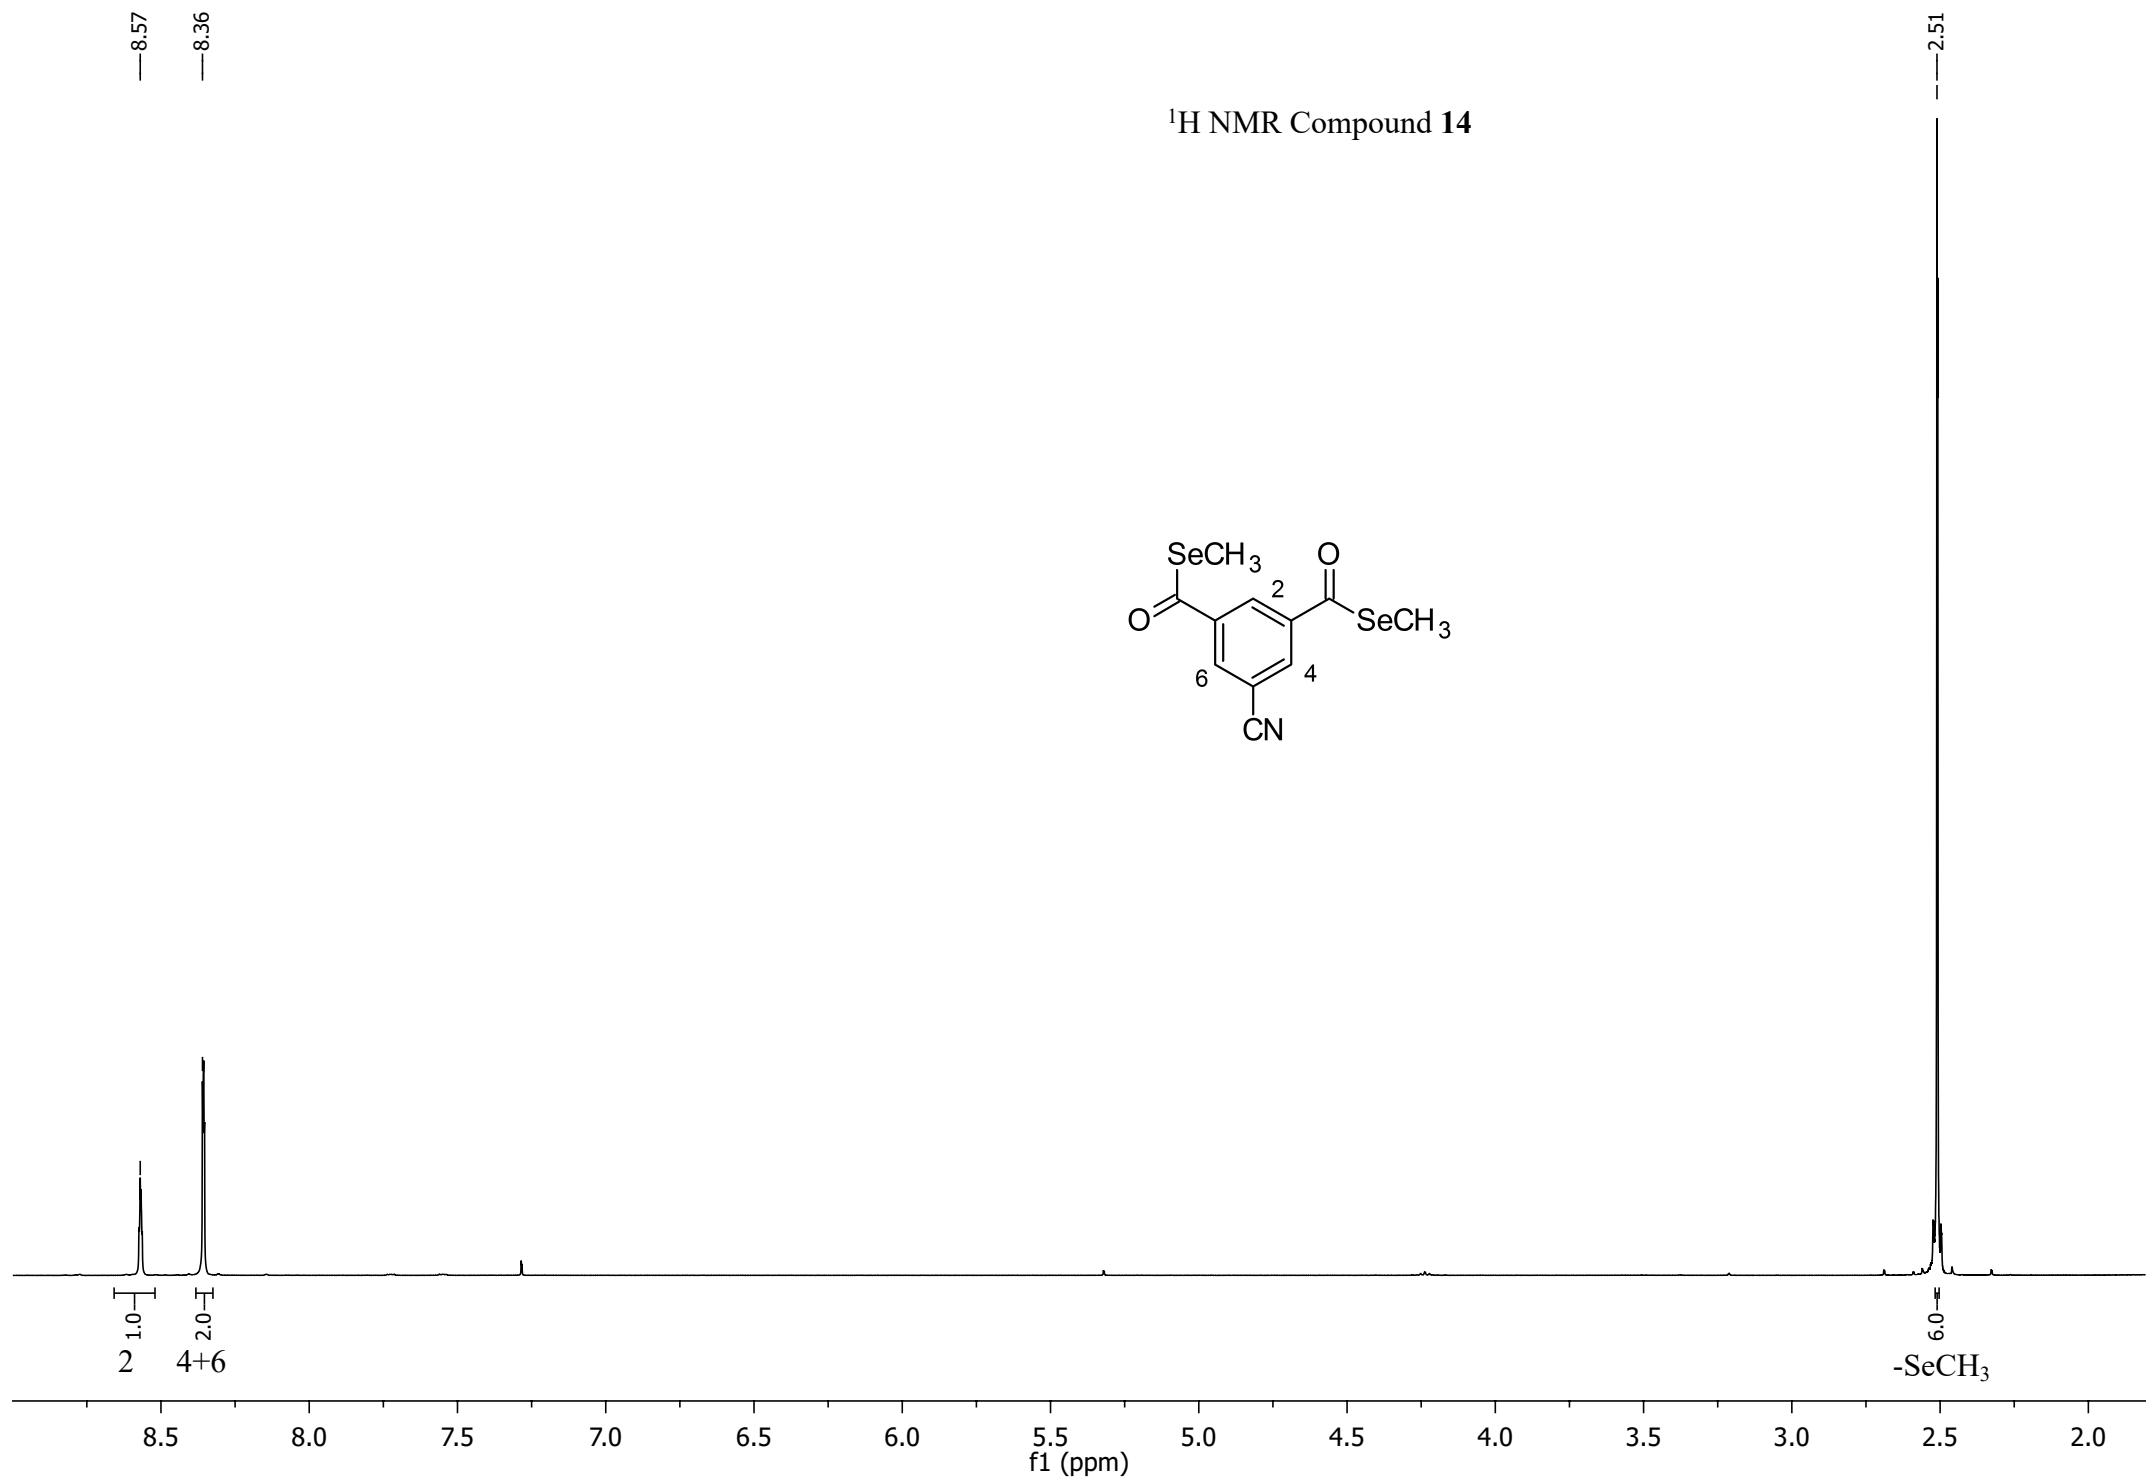

—192.85

—141.02

—134.47

—129.11

—117.08

—114.69

{ 77.76  
77.44  
77.12 }

<sup>13</sup>C NMR Compound **14**

—6.55

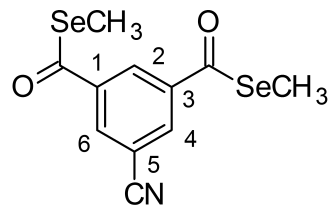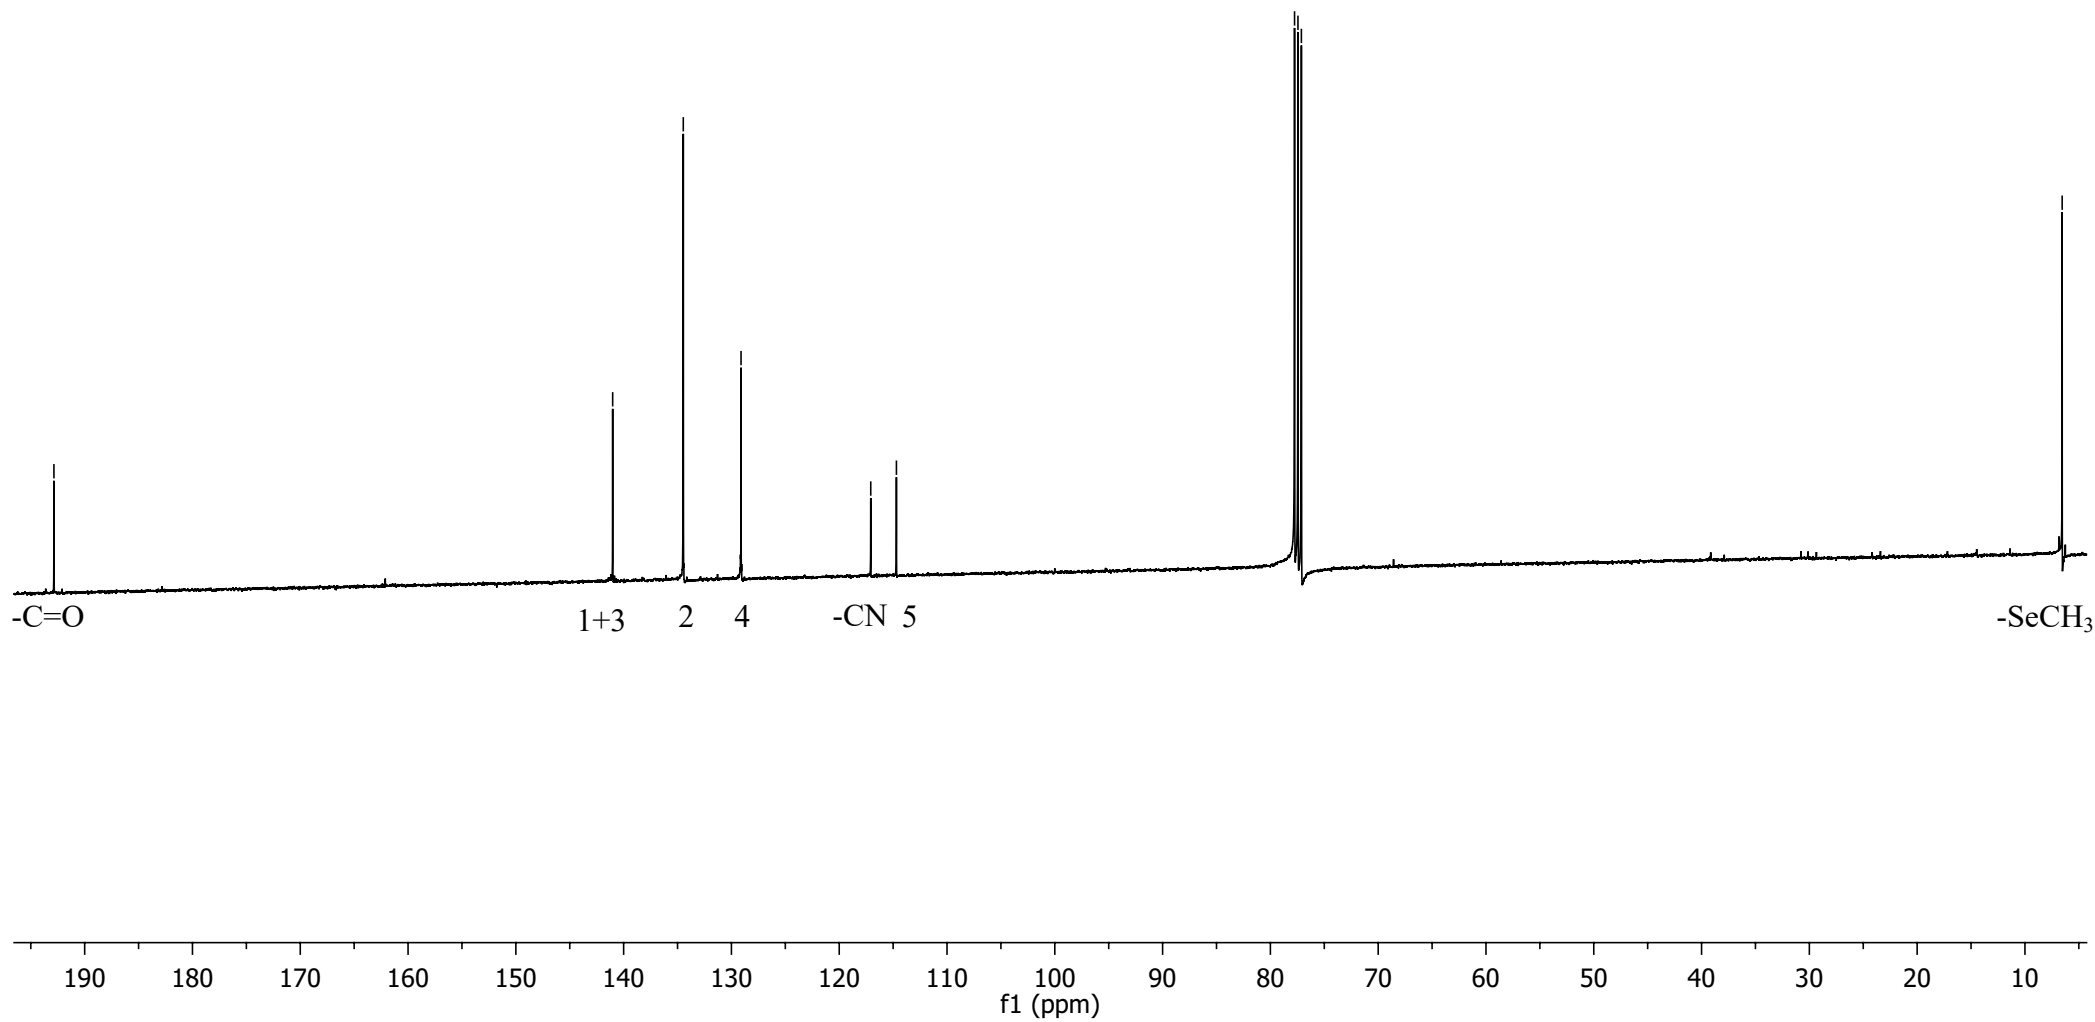

—7.21

$^1\text{H}$  NMR Compound **15**

—2.43

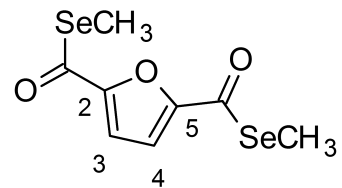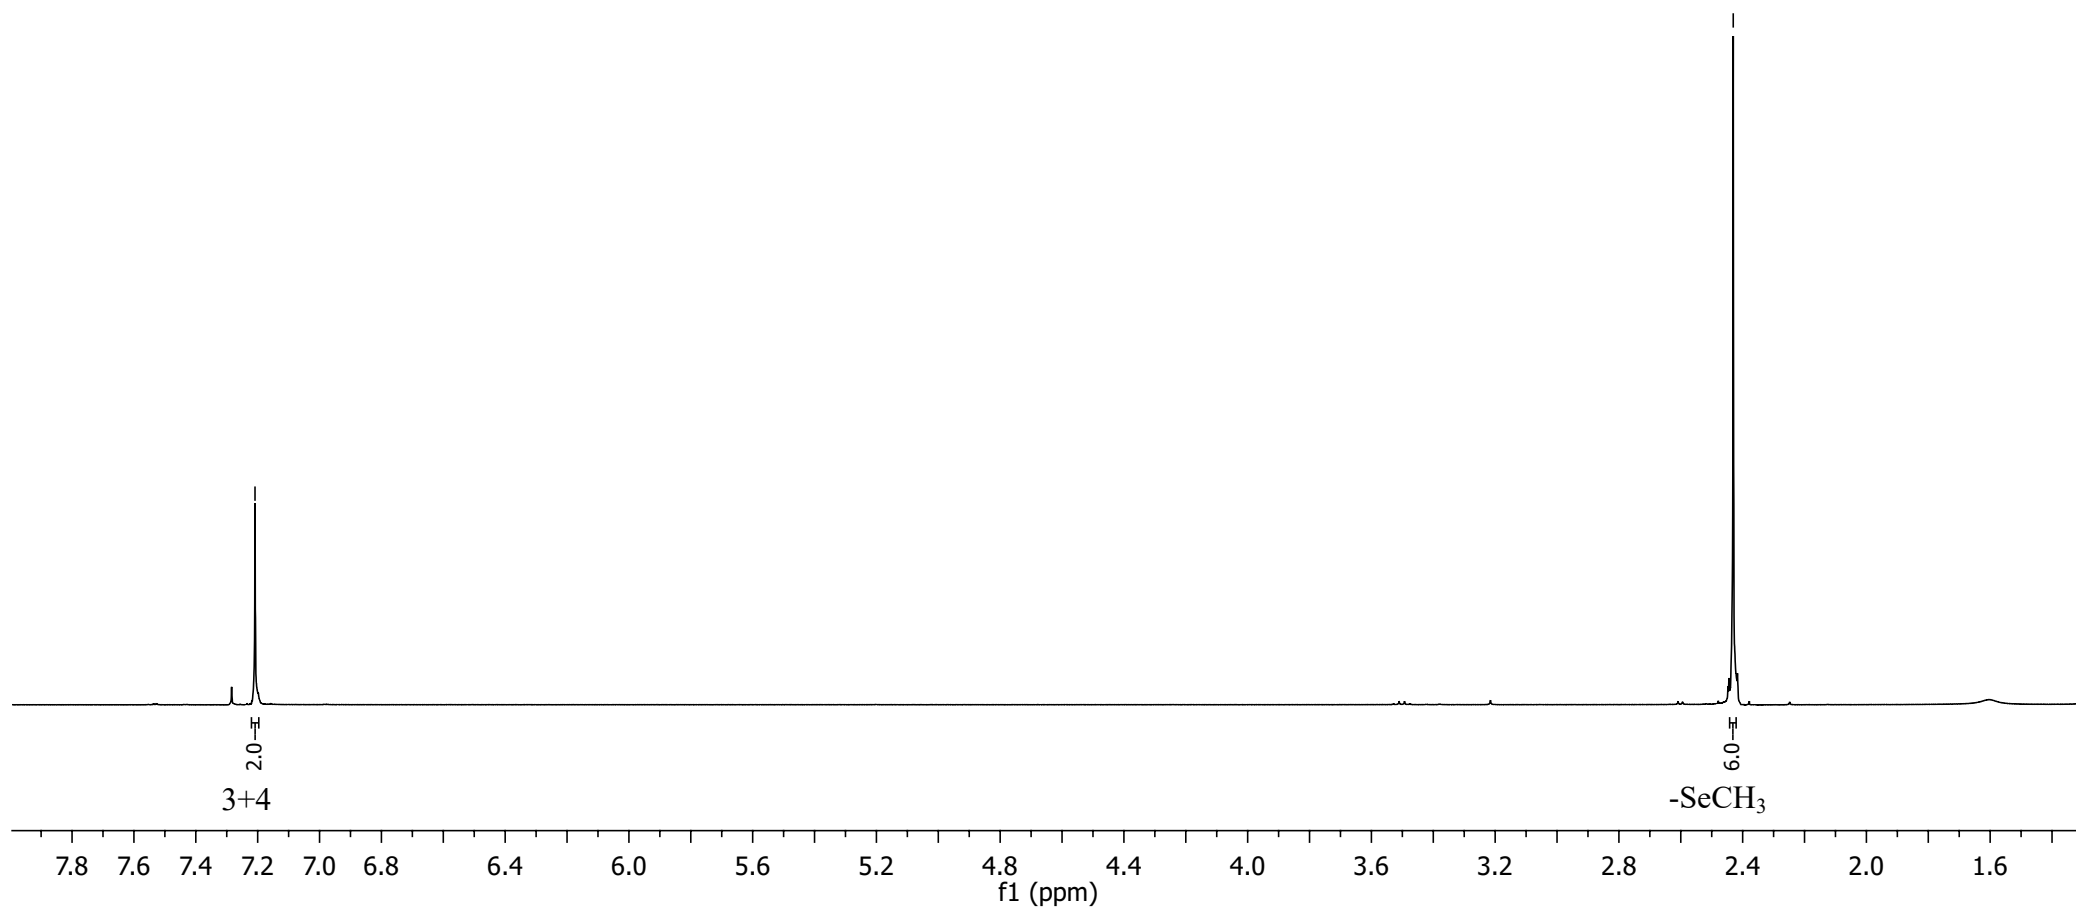

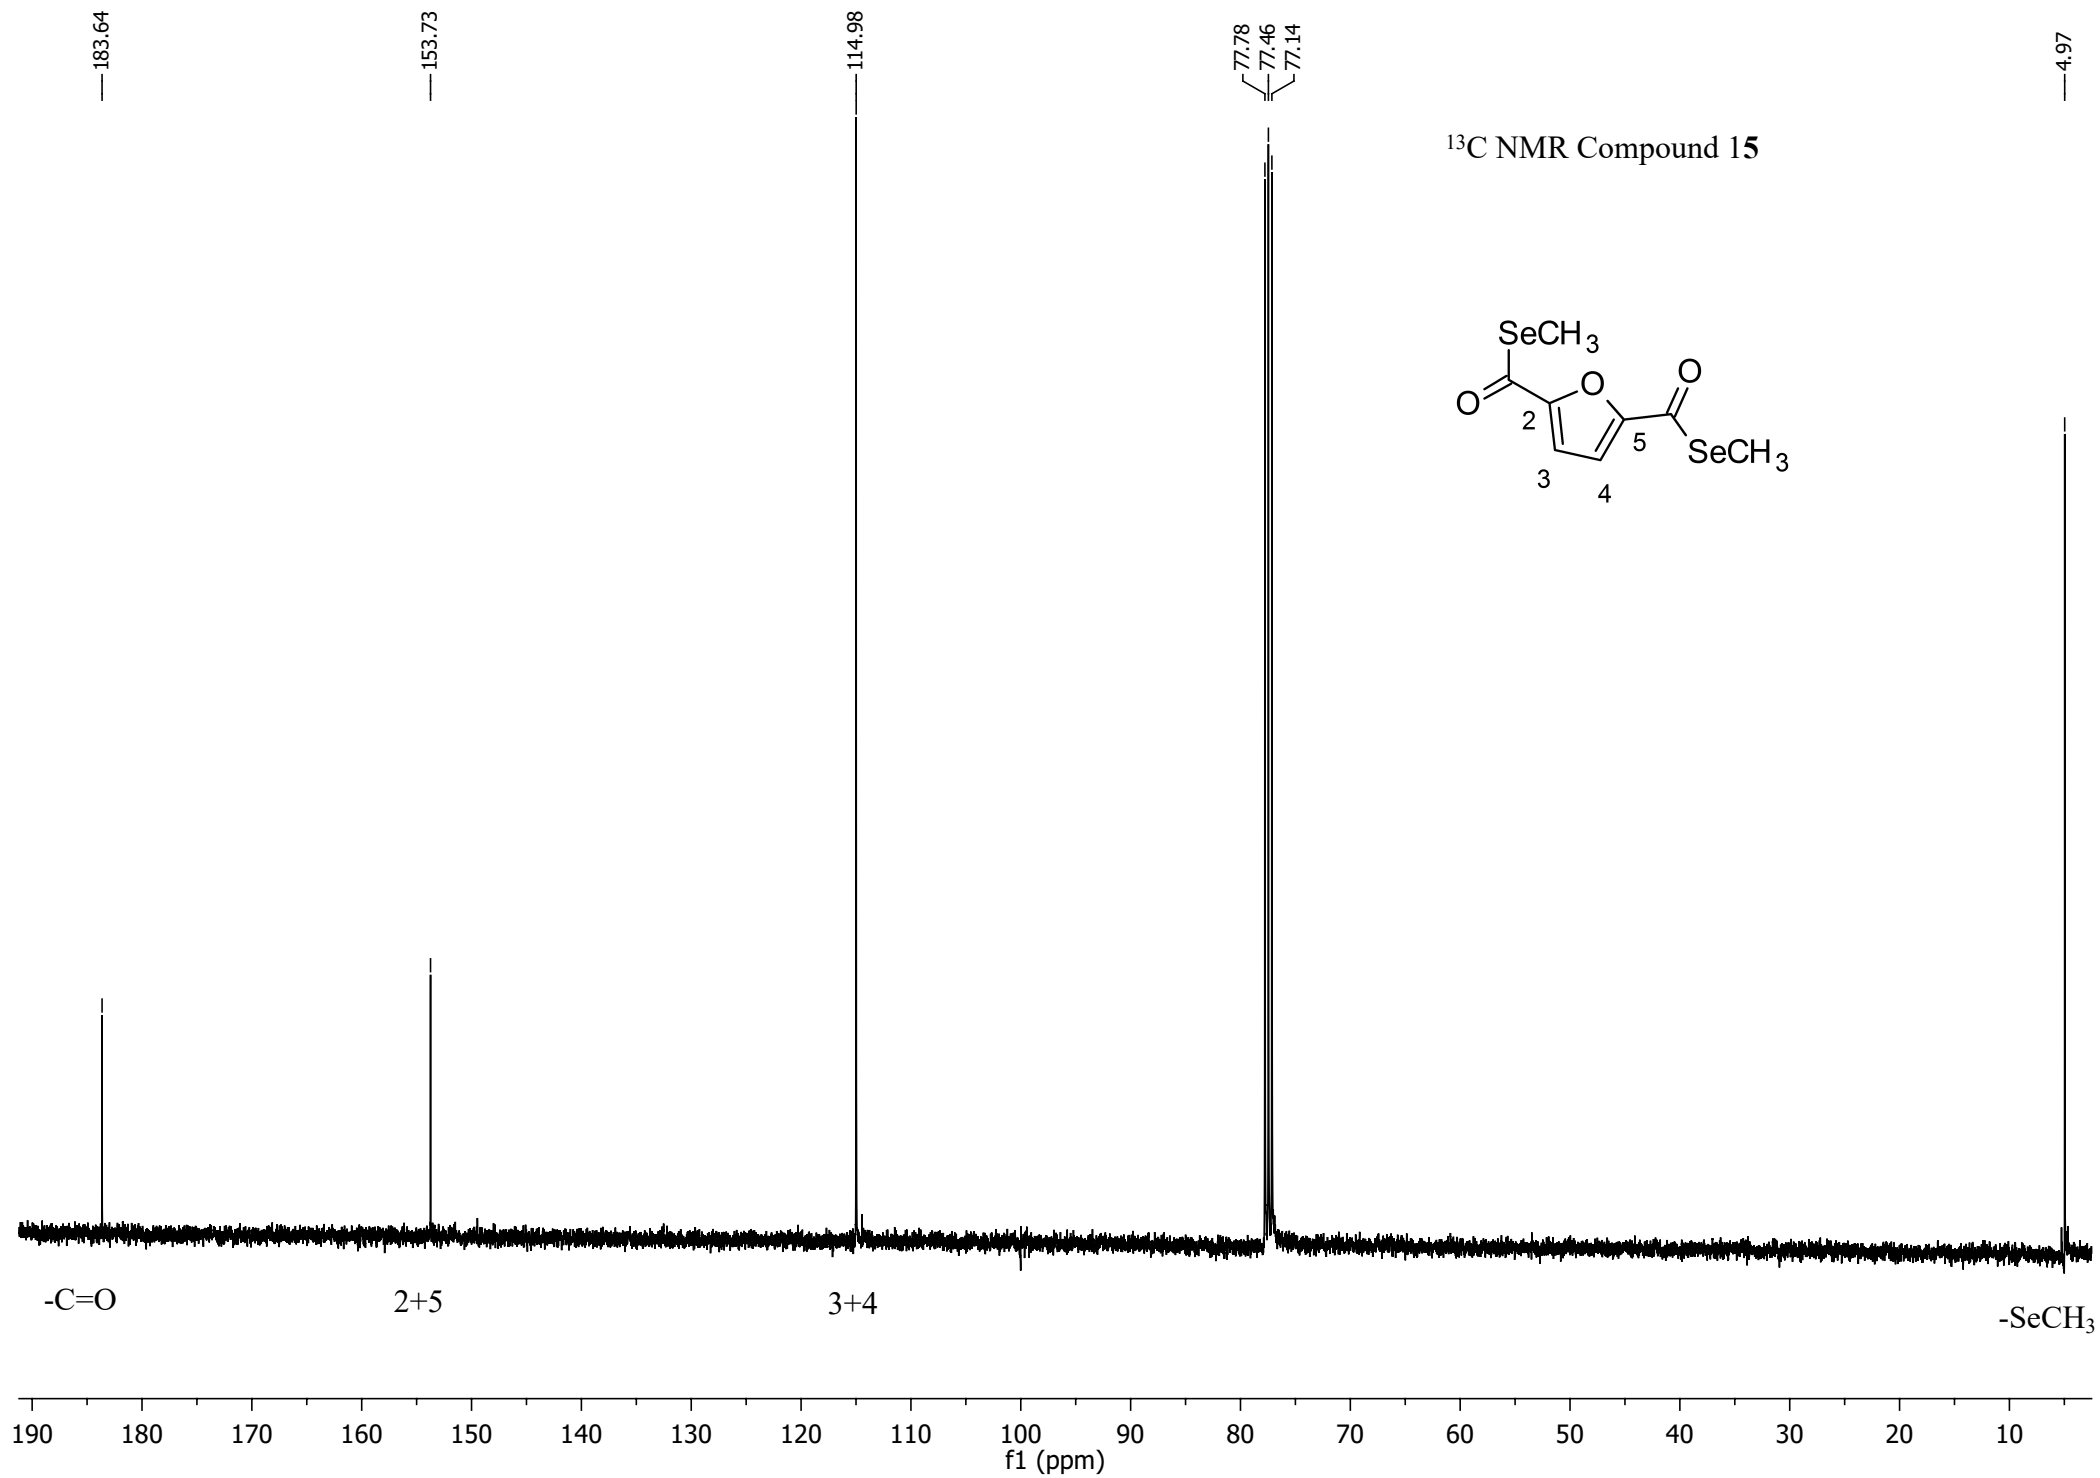

Supplement: molecules-22-01288-s001.pdf [file molecules-22-01288-s001.pdf]
